# Supplementary material
Source: PubMed Central journal article supplement (PMC3144986)
Supplement: NIHMS268105-supplement-2_si_002.pdf [file NIHMS268105-supplement-2_si_002.pdf]

## Supporting Information

### Rhodium(II)-Catalyzed Enantioselective C-H Functionalization of Indoles

Andrew DeAngelis, Valerie W. Shurtleff, Olga Dmitrenko, and Joseph M. Fox\*

Brown Laboratories, Department of Chemistry and Biochemistry, University of Delaware,  
Newark, DE 19716

| <b>Experimental Section</b>              | <b>Page</b> |
|------------------------------------------|-------------|
| General Considerations                   | S-4         |
| Assignment of Absolute Configuration     | S-5         |
| Experimental Procedures                  | S-5         |
| References                               | S-30        |
| <b>Spectral Data</b>                     |             |
| <sup>1</sup> H NMR spectrum of <b>A</b>  | S-32        |
| <sup>13</sup> C NMR spectrum of <b>A</b> | S-33        |
| <sup>1</sup> H NMR spectrum of <b>B</b>  | S-34        |
| <sup>13</sup> C NMR spectrum of <b>B</b> | S-35        |
| <sup>1</sup> H NMR spectrum of <b>C</b>  | S-36        |
| <sup>13</sup> C NMR spectrum of <b>C</b> | S-37        |
| <sup>1</sup> H NMR spectrum of <b>D</b>  | S-38        |
| <sup>13</sup> C NMR spectrum of <b>D</b> | S-39        |
| <sup>1</sup> H NMR spectrum of <b>E</b>  | S-40        |
| <sup>13</sup> C NMR spectrum of <b>E</b> | S-41        |

|                                           |      |
|-------------------------------------------|------|
| <sup>1</sup> H NMR spectrum of <b>F</b>   | S-42 |
| <sup>13</sup> C NMR spectrum of <b>F</b>  | S-43 |
| <sup>1</sup> H NMR spectrum of <b>1</b>   | S-44 |
| <sup>13</sup> C NMR spectrum of <b>1</b>  | S-45 |
| HPLC Trace of <b>1</b>                    | S-46 |
| <sup>1</sup> H NMR spectrum of <b>2</b>   | S-47 |
| <sup>13</sup> C NMR spectrum of <b>2</b>  | S-48 |
| HPLC Trace of <b>2</b>                    | S-49 |
| <sup>1</sup> H NMR spectrum of <b>3</b>   | S-50 |
| <sup>13</sup> C NMR spectrum of <b>3</b>  | S-51 |
| HPLC Trace of <b>3</b>                    | S-52 |
| <sup>1</sup> H NMR spectrum of <b>4</b>   | S-53 |
| <sup>13</sup> C NMR spectrum of <b>4</b>  | S-54 |
| HPLC Trace of <b>4</b>                    | S-55 |
| <sup>1</sup> H NMR spectrum of <b>5</b>   | S-56 |
| <sup>13</sup> C NMR spectrum of <b>5</b>  | S-57 |
| HPLC Trace of <b>5</b>                    | S-58 |
| <sup>1</sup> H NMR spectrum of <b>6</b>   | S-59 |
| <sup>13</sup> C NMR spectrum of <b>6</b>  | S-60 |
| HPLC Trace of <b>6</b>                    | S-61 |
| <sup>1</sup> H NMR spectrum of <b>7</b>   | S-62 |
| <sup>13</sup> C NMR spectrum of <b>7</b>  | S-63 |
| HPLC Trace of <b>7</b>                    | S-64 |
| <sup>1</sup> H NMR spectrum of <b>8</b>   | S-65 |
| <sup>13</sup> C NMR spectrum of <b>8</b>  | S-66 |
| HPLC Trace of <b>8</b>                    | S-67 |
| <sup>1</sup> H NMR spectrum of <b>9</b>   | S-68 |
| <sup>13</sup> C NMR spectrum of <b>9</b>  | S-69 |
| HPLC Trace of <b>9</b>                    | S-70 |
| <sup>1</sup> H NMR spectrum of <b>10</b>  | S-71 |
| <sup>13</sup> C NMR spectrum of <b>10</b> | S-72 |

|                                           |      |
|-------------------------------------------|------|
| HPLC Trace of <b>10</b>                   | S-73 |
| <sup>1</sup> H NMR spectrum of <b>11</b>  | S-74 |
| <sup>13</sup> C NMR spectrum of <b>11</b> | S-75 |
| HPLC Trace of <b>11</b>                   | S-76 |
| <sup>1</sup> H NMR spectrum of <b>12</b>  | S-77 |
| <sup>13</sup> C NMR spectrum of <b>12</b> | S-78 |
| HPLC Trace of <b>12</b>                   | S-79 |
| <sup>1</sup> H NMR spectrum of <b>13</b>  | S-80 |
| <sup>13</sup> C NMR spectrum of <b>13</b> | S-81 |
| HPLC Trace of <b>13</b>                   | S-82 |
| <sup>1</sup> H NMR spectrum of <b>14</b>  | S-83 |
| <sup>13</sup> C NMR spectrum of <b>14</b> | S-84 |
| HPLC Trace of <b>14</b>                   | S-85 |
| <sup>1</sup> H NMR spectrum of <b>15</b>  | S-86 |
| <sup>13</sup> C NMR spectrum of <b>15</b> | S-87 |
| HPLC Trace of <b>15</b>                   | S-88 |
| <sup>1</sup> H NMR spectrum of <b>16</b>  | S-89 |
| <sup>13</sup> C NMR spectrum of <b>16</b> | S-90 |
| HPLC Trace of <b>16</b>                   | S-91 |
| <sup>1</sup> H NMR spectrum of <b>17</b>  | S-92 |
| <sup>13</sup> C NMR spectrum of <b>17</b> | S-93 |
| HPLC Trace of <b>17</b>                   | S-94 |
| <sup>1</sup> H NMR spectrum of <b>G</b>   | S-95 |
| <sup>13</sup> C NMR spectrum of <b>G</b>  | S-96 |
| HPLC Trace of <b>G</b>                    | S-97 |
| Computational details                     | S-98 |

## General Considerations

All reactions were carried out in glassware that was flame-dried under vacuum and cooled under nitrogen. Toluene, diethyl ether, hexanes, methylene chloride, and acetonitrile were dried with columns packed with activated neutral alumina and degassed with nitrogen prior to use. THF was distilled from sodium/benzophenone. Chromatography was performed on silica gel (silicycle 40-63D, 60Å). For  $^{13}\text{C}$  NMR, multiplicities were distinguished using an ATP pulse sequence: typical methylene and quaternary carbons appear 'up' (u); methine and methyl carbons appear 'down' (dn). NMR yields were determined by addition of 1 equivalent of methyl *tert*-butyl ether as an internal standard to the crude reaction mixture. Reagents were used directly as purchased from commercial sources without further purification. Ethyl 2-diazopropanoate, ethyl 2-diazobutanoate, ethyl 2-diazohexanoate, ethyl 2-diazo-octanoate, ethyl 2-diazo-5-methylhexanoate, methyl 2-diazobutanoate, and propyl 2-diazobutanoate were prepared from the corresponding  $\beta$ -ketoesters according to literature protocol.<sup>1</sup> 1-Phenylindole,<sup>2</sup> 2-methyl-1-phenylindole,<sup>3</sup> 1-benzyl-2-methylindole,<sup>3</sup> 1-(4-bromophenyl)indole,<sup>4</sup> dihydro-3H-pyrrolo[1,2- $\alpha$ ]indole,<sup>5</sup> 6,7,8,9-tetrahydropyrido[1,2- $\alpha$ ]indole,<sup>6</sup> and 1,2-dimethyl-5-methoxyindole,<sup>7</sup> dirhodium tetrakis *N*-1,8-naphthoyl (*S*)-*tert*-leucinate,<sup>8</sup> dirhodium tetrakis *N*-phthaloyl (*S*)-*tert*-leucinate,<sup>9</sup> dirhodium tetrakis *N*-tetrachlorophthaloyl (*S*)-*tert*-leucinate,<sup>10</sup> dirhodium tetrapivalate,<sup>11</sup> 4-iodo-*N*-*tert*-butoxycarbonylamino-benzene,<sup>12</sup> and *tert*-butyl(4-iodophenoxy)dimethylsilane<sup>13</sup> were also prepared by literature methods. X-ray quality crystals of **G** were grown by slow diffusion of a solution of **G** in 1:1 benzene/hexanes into hexanes. Enantiomeric excesses were measured on materials directly after chromatography (i.e. the reported ee's have not been enhanced through crystallization).

## Assignment of Absolute Configuration

For the indole functionalization reactions catalyzed by  $\text{Rh}_2(\text{S-NTTL})_4$ , the absolute configuration was determined by x-ray diffraction of compound **G** which was prepared from indole **C** and methyl 2-diazobutanoate. From the x-ray data, it was determined that the absolute configuration of the product is *R*.

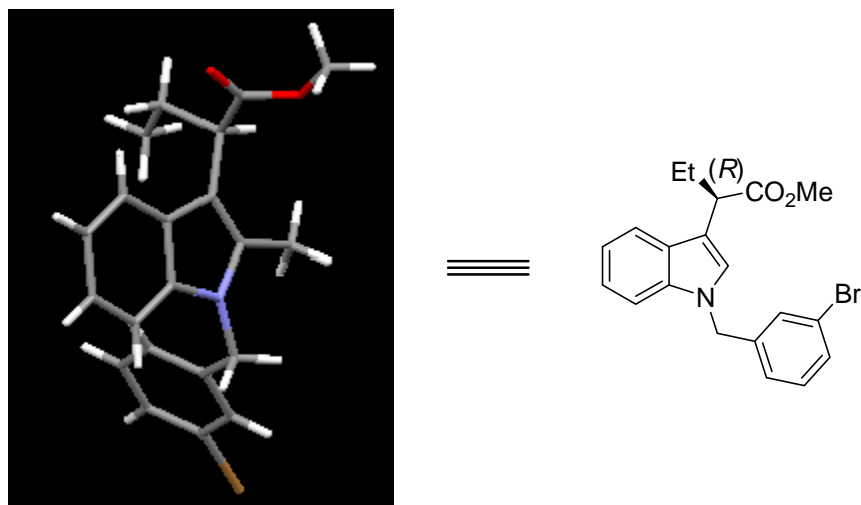

## Experimental Procedures

### 1-Benzyl-2,5-dimethylindole (A)

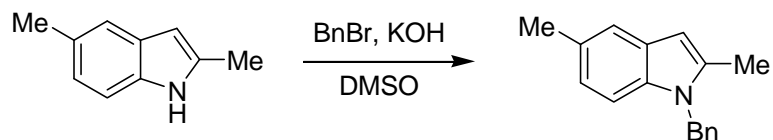

To a dry round bottomed flask was added 1.55 g powdered KOH (27.6 mmol) and 13.5 mL DMSO. The mixture was stirred at ambient temperature for 5 minutes and then 1.00 g (6.89 mmol) of 2,5-dimethylindole was added and the mixture was stirred for an additional 45 minutes and then cooled by an ice bath (0 °C). Benzyl bromide (1.65 mL, 13.8 mmol) was then added

and the mixture was allowed to warm to ambient temperature and stir for 45 minutes. It was then diluted with 13.5 mL of water and extracted with three 50 mL portions of Et<sub>2</sub>O. The combined organic extracts were then washed with three 50 mL portions of water, dried over anhydrous MgSO<sub>4</sub>, decanted, and concentrated. The residue was chromatographed on silica gel eluting with pure hexanes to give 0.545 g (2.32 mmol, 34%) of the title compound as a white solid, m.p. 73 – 75 °C. <sup>1</sup>H NMR (C<sub>6</sub>D<sub>6</sub>, 400 MHz, δ): 7.48 (s, 1H), 7.01 – 6.88 (m, 5H), 6.72 – 6.67 (m, 2H), 6.30 (s, 1H), 4.70 (s, 2H), 2.43 (s, 3H), 1.94 (s, 3H); <sup>13</sup>C NMR (C<sub>6</sub>D<sub>6</sub>, 100 MHz, δ): 138.6 (u), 136.4 (u) (2 carbons), 129.3 (dn), 128.9 (u), 128.8 (u), 127.3 (dn), 126.1 (dn), 122.8 (dn), 120.3 (dn), 109.3 (dn), 100.7 (dn), 46.3 (u), 21.8 (dn), 12.5 (dn); IR (Thin film, cm<sup>-1</sup>): 3029, 2920, 2861, 1604, 1580, 1555, 1485, 1453, 1440, 1354, 1329, 1298, 1175, 1161, 1029, 866, 789, 717; HRMS-CI (NH<sub>3</sub>) m/z: [M<sup>+</sup>], calcd for C<sub>17</sub>H<sub>17</sub>N, 235.1361; found 235.1356.

### 1-Benzyl-5-fluoro-2-methylindole (B)

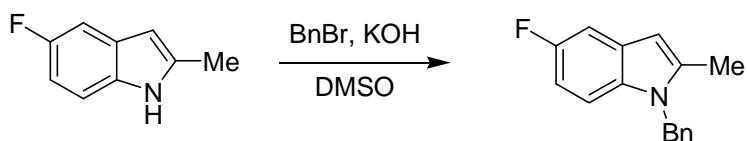

To a dry round bottomed flask was added 1.50 g powdered KOH (26.8 mmol) and 13.5 mL DMSO. The mixture was stirred at ambient temperature for 5 minutes and then 1.00 g (6.71 mmol) of 5-fluoro-2-methylindole was added and the mixture was stirred for an additional 45 minutes and then cooled by an ice bath (0 °C). Benzyl bromide (1.60 mL, 13.4 mmol) was then added and the mixture was allowed to warm to ambient temperature and stir for 45 minutes. It was then diluted with 13.5 mL of water and extracted with three 50 mL portions of Et<sub>2</sub>O. The combined organic extracts were then washed with three 50 mL portions of water, dried over

anhydrous  $\text{MgSO}_4$ , decanted, and concentrated. The residue was chromatographed on silica gel eluting with pure hexanes to give 0.855 g (3.58 mmol, 53%) of the title compound as a white solid, m.p. 72 – 74 °C.  $^1\text{H}$  NMR ( $\text{C}_6\text{D}_6$ , 400 MHz,  $\delta$ ): 7.36 – 7.32 (m, 1H), 6.96 – 6.90 (m, 3H), 6.90 – 6.85 (m, 1H), 6.71 – 6.67 (m, 1H), 6.64 – 6.58 (m, 2H), 6.13 (s, 1H), 4.57 (s, 2H), 1.86 (s, 3H);  $^{13}\text{C}$  NMR ( $\text{CDCl}_3$ , 100 MHz,  $\delta$ ): 158.0 (u) [d,  $^1J(\text{CF}) = 232$  Hz], 138.5 (u), 137.5 (u), 133.6 (u), 128.8 (dn), 128.4 (u) [d,  $^3J(\text{CF}) = 9.8$  Hz], 127.4 (dn), 125.8 (dn), 109.7 (dn) [d,  $^3J(\text{CF}) = 10$  Hz], 108.8 (dn) [d,  $^2J(\text{CF}) = 26$  Hz], 104.6 (dn) [d,  $^2J(\text{CF}) = 23$  Hz], 100.5 (dn) [d,  $^4J(\text{CF}) = 4.4$  Hz], 46.6 (u), 12.9 (dn); IR (Thin film,  $\text{cm}^{-1}$ ): 3064, 3032, 2921, 1620, 1587, 1483, 1451, 1402, 1355, 1334, 1181, 1144, 1123, 1104, 1029, 953, 859, 792; HRMS-CI ( $\text{NH}_3$ ) m/z:  $[\text{M}^+]$ , calcd for  $\text{C}_{16}\text{H}_{14}\text{NF}$ , 239.1110; found 239.1107.

### 1-(3-Bromobenzyl)-2-methylindole (C)

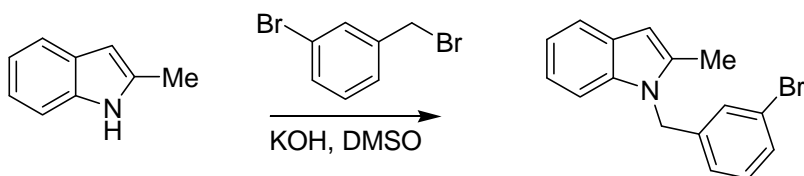

To a dry round bottomed flask was added 8.55 g powdered KOH (152 mmol) and 76 mL DMSO. The mixture was stirred at ambient temperature for 5 minutes and then 5.00 g (38.1 mmol) of 2-methylindole was added and the mixture was stirred for an additional 45 minutes and then cooled by an ice bath (0 °C). 3-Bromobenzyl bromide (19.0 g, 76.2 mmol) was then added and the mixture was allowed to warm to ambient temperature and stir for 45 minutes. It was then diluted with 76 mL of water and extracted with three 150 mL portions of  $\text{Et}_2\text{O}$ . The combined organic extracts were then washed with three 50 mL portions of water, dried over anhydrous  $\text{MgSO}_4$ ,

decanted, and concentrated. The residue was chromatographed on silica gel eluting with pure hexanes to give 5.64 g (18.8 mmol, 49%) of the title compound as a pale yellow oil.  $^1\text{H}$  NMR ( $\text{C}_6\text{D}_6$ , 400 MHz,  $\delta$ ): 7.63 (d,  $J = 7.8$  Hz, 1H), 7.19 – 7.08 (m, 2H), 7.03 – 6.96 (m, 2H), 6.90 (d,  $J = 8.2$  Hz, 1H), 6.44 (app t,  $J = 8.0$  Hz, 1H), 6.34 – 6.25 (m, 2H), 4.47 (s, 2H), 1.83 (s, 3H);  $^{13}\text{C}$  NMR ( $\text{C}_6\text{D}_6$ , 100 MHz,  $\delta$ ): 140.8 (u), 137.6 (u), 136.2 (u), 130.6 (dn), 130.5 (dn), 129.3 (dn), 128.9 (u), 124.5 (dn), 123.0 (u), 121.4 (dn), 120.4 (dn), 120.3 (dn), 109.3 (dn), 101.3 (dn), 45.4 (u), 12.4 (dn); IR ( $\text{CHCl}_3$ ,  $\text{cm}^{-1}$ ): 3053, 2937, 2861, 1596, 1571, 1555, 1476, 1463, 1427, 1398, 1336, 1310, 1257, 1166, 1071, 1009, 896, 776, 747; HRMS-CI ( $\text{NH}_3$ )  $m/z$ :  $[\text{M}^+]$ , calcd for  $\text{C}_{16}\text{H}_{14}\text{N}^{79}\text{Br}$ , 299.0310; found 299.0305.

### Methyl 1-phenyl-1*H*-indole-6-carboxylate (**D**)

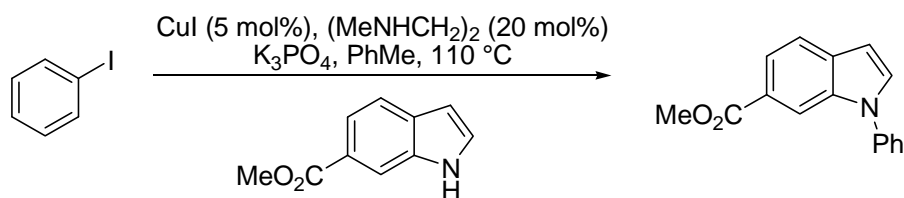

A literature procedure was followed.<sup>2</sup> Thus, a resealable Schlenk tube was charged with CuI (24 mg, 0.13 mmol), indole-6-methoxycarbonyl (0.525 g, 3.0 mmol), and  $\text{K}_3\text{PO}_4$  (1.11 g, 5.3 mmol) and the vessel was evacuated and filled with  $\text{N}_2$ . Iodobenzene (0.28 mL, 2.5 mmol),  $N,N'$ -dimethylethylenediamine (54  $\mu\text{L}$ , 0.50 mmol), and toluene (2.5 mL) were then added and the vessel was sealed and heated to 110  $^\circ\text{C}$  for 20h. The reaction mixture was then allowed to cool to ambient temperature, diluted with 10 mL of ethyl acetate, filtered through a plug of silica eluting with 50 mL of additional ethyl acetate, concentrated, and chromatographed on silica gel eluting with a gradient of 0 – 10% ethyl acetate/hexanes to give 0.45 g (1.8 mmol, 72%) of **D** as a white



solid, m.p. 66 – 68 °C. The purity was measured to be > 95% by <sup>1</sup>H NMR. <sup>1</sup>H NMR (C<sub>6</sub>D<sub>6</sub>, 400 MHz, δ): 8.59 – 8.58 (m, 1H), 8.24 (dd, *J* = 8.6 Hz, 1.6 Hz, 1H), 7.60 (dd, *J* = 8.3 Hz, 0.68 Hz, 1H), 7.05 – 7.01 (m, 2H), 6.99 – 6.89 (m, 4H), 6.49 (dd, *J* = 3.3 Hz, 0.90 Hz, 1H), 3.52 (s, 3H); <sup>13</sup>C NMR (C<sub>6</sub>D<sub>6</sub>, 100 MHz, δ): 167.7 (u), 139.3 (u), 135.9 (u), 133.4 (u), 131.1 (dn), 129.8 (dn), 126.9 (dn), 125.2 (u), 124.7 (dn), 122.2 (dn), 121.3 (dn), 113.2 (dn), 104.1 (dn), 51.5 (dn); IR (CHCl<sub>3</sub>, cm<sup>-1</sup>): 3012, 2953, 1710, 1599, 1507, 1449, 1345, 1289, 1249, 1216, 1143, 1086, 992, 696; HRMS-CI (NH<sub>3</sub>) *m/z*: [M+H], calcd for C<sub>16</sub>H<sub>14</sub>NO<sub>2</sub>, 252.1025; found 252.1021.

***tert*-Butyl 4-(2-methyl-1*H*-indol-1-yl)phenylcarbamate (E)**

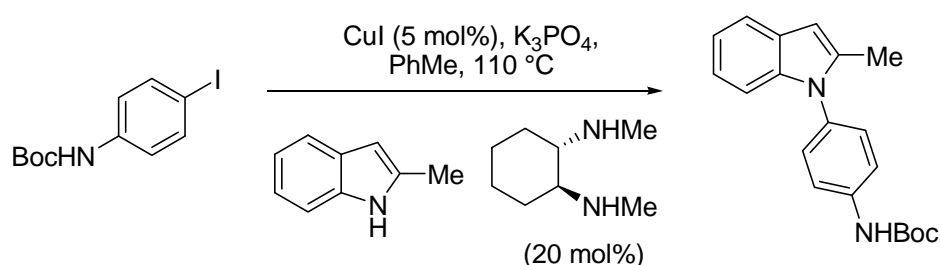

A literature procedure was followed.<sup>2</sup> Thus, a resealable Schlenk tube was charged with CuI (48 mg, 0.25 mmol), 2-methylindole (0.66 g, 5.0 mmol), and K<sub>3</sub>PO<sub>4</sub> (2.23 g 10.5 mmol) and the vessel was evacuated and filled with N<sub>2</sub>. *tert*-butyl 4-iodophenylcarbamate<sup>12</sup> (1.91 g, 6.00 mmol), *trans*-*N,N'*-dimethyl-1,2-cyclohexanediamine (0.16 mL, 1.0 mmol), and toluene (5 mL) were then added and the vessel was sealed and heated to 110 °C for 48h. The reaction mixture was then allowed to cool to ambient temperature, diluted with 20 mL of ethyl acetate, filtered through a plug of silica eluting with 100 mL of additional ethyl acetate, concentrated, and chromatographed on silica gel eluting with 50 % toluene/hexanes to give 0.23 g (0.71 mmol, 14%) of **E** as a white solid, m.p. 178 – 180 °C. The purity was measured to be > 95% by <sup>1</sup>H

NMR.  $^1\text{H}$  NMR ( $\text{CDCl}_3$ , 400 MHz,  $\delta$ ): 7.58 – 7.51 (m, 3H), 7.30 – 7.26 (2H), 7.12 – 7.05 (m, 3H), 6.62 (s, 1H), 6.39 (s, 1H), 2.29 (d,  $J = 0.89$  Hz, 3H), 1.56 (s, 9H);  $^{13}\text{C}$  NMR ( $\text{CDCl}_3$ , 100 MHz,  $\delta$ ): 152.7 (u), 138.2 (u), 137.8 (u), 137.2 (u), 132.6 (u), 128.6 (dn), 128.0 (u), 120.9 (dn), 119.9 (dn), 119.5 (dn), 119.1 (dn), 109.9 (dn), 100.9 (dn), 80.9 (u), 28.3 (dn), 13.3 (dn); IR ( $\text{CHCl}_3$ ,  $\text{cm}^{-1}$ ): 3438, 3011, 2983, 1726, 1522, 1459, 1410, 1391, 1369, 1308, 1216, 1156, 1054; HRMS-ESI  $m/z$ :  $[\text{M}+\text{H}]$ , calcd for  $\text{C}_{20}\text{H}_{23}\text{N}_2\text{O}_2$ , 323.1760; found 323.1753.

**1-(4-(*tert*-Butyldimethylsilyloxy)phenyl)-2-methyl-1*H*-indole (F)**

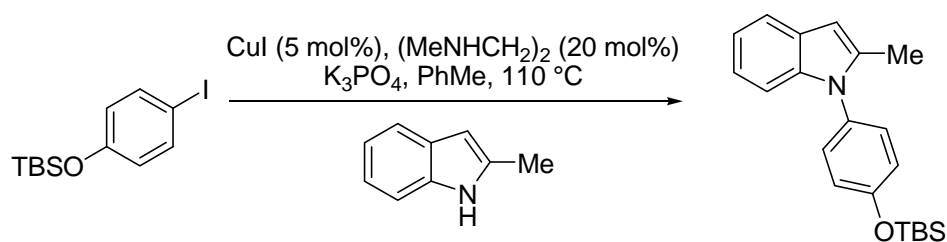

A literature procedure was followed.<sup>2</sup> Thus, a resealable Schlenk tube was charged with CuI (48 mg, 0.25 mmol), 2-methylindole (0.78 g, 6.0 mmol), and  $\text{K}_3\text{PO}_4$  (2.23 g 10.5 mmol) and the vessel was evacuated and filled with  $\text{N}_2$ . *tert*-butyl(4-iodophenoxy)dimethylsilane<sup>13</sup> (1.67 g, 5.00 mmol), *N,N'*-dimethylethylenediamine (0.11 mL, 1.0 mmol), and toluene (5 mL) were then added and the vessel was sealed and heated to 110 °C for 48h. The reaction mixture was then allowed to cool to ambient temperature, diluted with 20 mL of ethyl acetate, filtered through a plug of silica eluting with 100 mL of additional ethyl acetate, concentrated, and chromatographed on silica gel eluting with hexanes to give 1.15 g (3.41 mmol, 68%) of **F** as a pale yellow oil. The purity was measured to be > 95% by  $^1\text{H}$  NMR.  $^1\text{H}$  NMR ( $\text{CDCl}_3$ , 400 MHz,  $\delta$ ): 7.59 – 7.54 (m, 1H), 7.23 – 7.18 (m, 2H), 7.13 – 7.06 (m, 3H), 7.01 – 6.96 (m, 2H), 6.39 (s,

1H), 2.31 (d,  $J = 1.0$  Hz, 3H), 1.04 (s, 9H), 0.29 (s, 6H);  $^{13}\text{C}$  NMR ( $\text{CDCl}_3$ , 100 MHz,  $\delta$ ): 155.2 (u), 138.4 (u), 137.3 (u), 131.1 (u), 129.1 (dn), 128.0 (u), 120.8 (dn), 120.7 (dn), 119.8 (dn), 119.4 (dn), 110.0 (dn), 100.6 (dn), 25.6 (dn), 18.2 (u), 13.3 (dn),  $-4.39$  (dn); IR ( $\text{CHCl}_3$ ,  $\text{cm}^{-1}$ ): 3008, 2957, 2932, 2860, 1609, 1511, 1460, 1391, 1323, 1265, 1163, 913.

### General procedure for the preparation of racemic samples

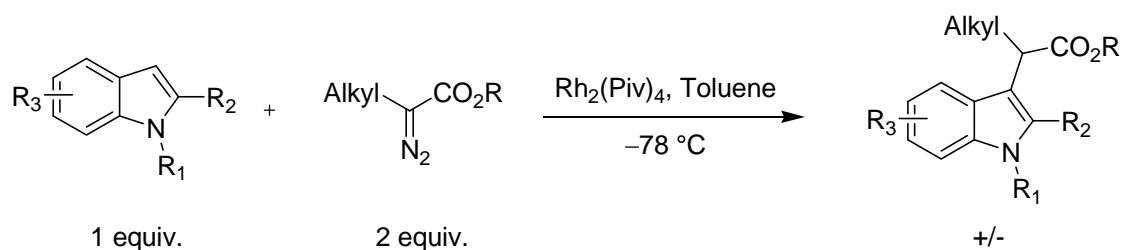

In a dry round bottomed flask,  $\text{Rh}_2\text{Piv}_4$  (1 mg, 0.002 mmol) and 0.40 mmol of indole were dissolved in anhydrous toluene (2.0 mL) and cooled by a bath of dry ice/acetone ( $-78\text{ }^\circ\text{C}$ ) under a nitrogen atmosphere. The appropriate diazoester (0.80 mmol) was dissolved in anhydrous toluene (1.2 mL) and added to the reaction mixture via syringe pump at a rate of 1 mL/h. After the addition was complete, the mixture was allowed to warm to ambient temperature. The solvent was subsequently removed and the residue was chromatographed on silica gel.

## General Procedure for Enantioselective Indole Functionalization

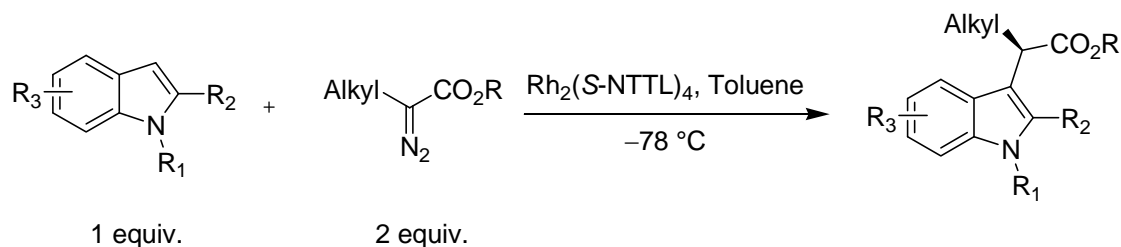

A dry round bottomed flask was charged with 3 mg (0.002 mmol) of  $\text{Rh}_2(\text{S-NTTL})_4$  and 0.40 mmol of indole, and the flask was evacuated and filled with nitrogen. Anhydrous toluene (2.0 mL) was added, and the flask was cooled by a bath of dry ice/acetone ( $-78\text{ }^\circ\text{C}$ ). The appropriate diazoester (0.80 mmol) was dissolved in anhydrous toluene (1.2 mL) and added to the reaction mixture via syringe pump at a rate of 1 mL/h. After the addition was complete, the mixture was allowed to warm to ambient temperature. The solvent was subsequently removed and the residue was chromatographed on silica gel.

### (*R*)-(-)-Ethyl 2-(1,2-dimethyl-1*H*-indol-3-yl)hexanoate (**1**)

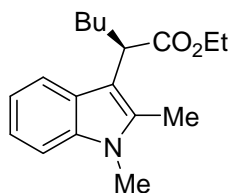

The general procedure for enantioselective indole functionalization was followed on 1.5 $\times$  scale: 87 mg (0.60 mmol) of 1,2-dimethylindole and 204 mg (1.20 mmol) of ethyl 2-diazohexanoate gave 167 mg (0.58 mmol, 97%) of **1** as a pale yellow oil. The purity was measured to be  $\geq 95\%$  by  $^1\text{H}$  NMR. The enantiomeric excess was measured to be 94% by HPLC analysis. A similar

experiment starting with 58 mg (0.40 mmol) of 1,2-dimethylindole and 136 mg (0.80 mmol) of ethyl 2-diazohehexanoate gave 108 mg (0.38 mmol, 95%) of **1**. The enantiomeric excess was measured to be 95% by HPLC analysis.  $[\alpha]_D^{18} = -52.6^\circ$  (c. 1.01 CHCl<sub>3</sub>); <sup>1</sup>H NMR (C<sub>6</sub>D<sub>6</sub>, 400 MHz, δ): 8.10 (app d, *J* = 8.3 Hz, 1H), 7.24 – 7.16 (m, 2H), 7.01 – 6.96 (m, 1H), 4.06 – 3.98 (m, 1H), 3.97 – 3.86 (m, 2H), 2.78 (s, 3H), 2.50 – 2.39 (m, 1H), 2.22 – 2.10 (m, 1H), 2.06 (s, 3H), 1.42 – 1.18 (m, 4H), 0.88 (t, *J* = 7.2 Hz, 3H), 0.80 (t, *J* = 7.1 Hz, 3H); <sup>13</sup>C NMR (C<sub>6</sub>D<sub>6</sub>, 100 MHz, δ): 174.3 (u), 137.3 (u), 133.5 (u), 127.3 (u), 121.1 (dn), 119.9 (dn), 119.6 (dn), 109.3 (u), 109.0 (dn), 60.4 (u), 43.5 (dn), 32.1 (u), 30.4 (u), 28.8 (dn), 23.0 (u), 14.3 (dn) (2 carbons), 10.4 (dn); IR (CHCl<sub>3</sub>, cm<sup>-1</sup>): 3007, 2958, 2933, 2872, 1724, 1612, 1562, 1471, 1369, 1335, 1216, 1173, 1116, 1039, 757; HRMS-Cl (NH<sub>3</sub>) *m/z*: [M<sup>+</sup>], calcd for C<sub>18</sub>H<sub>25</sub>NO<sub>2</sub>, 287.1885; found 287.1883.

**(R)-(-)-Ethyl 2-(1,2-dimethyl-1*H*-indol-3-yl)butanoate (2)**

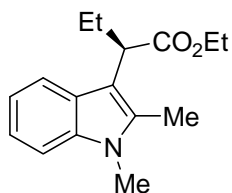

The general procedure for enantioselective indole functionalization was followed with 58 mg (0.40 mmol) of 1,2-dimethylindole and 114 mg (0.80 mmol) of ethyl 2-diazobutanoate to give 94 mg (0.36 mmol, 90%) of **2** as a pale yellow oil. The purity was measured to be  $\geq 95\%$  by <sup>1</sup>H NMR. The enantiomeric excess was measured to be 89% by HPLC analysis. An identical experiment gave 93 mg (0.36 mmol, 90%) of **2**. The enantiomeric excess was measured to be 91% by HPLC analysis.  $[\alpha]_D^{18} = -46.1^\circ$  (c. 1.01 CHCl<sub>3</sub>); <sup>1</sup>H NMR (C<sub>6</sub>D<sub>6</sub>, 400 MHz, δ): 8.08 –

7.99 (m, 1H), 7.22 – 7.16 (m, 2H), 7.01 – 6.94 (m, 1H), 4.03 – 3.95 (m, 1H), 3.94 – 3.86 (m, 1H), 3.78 – 3.69 (app t,  $J = 7.7$  Hz, 1H), 2.80 (s, 3H), 2.48 – 2.36 (m, 1H), 2.15 – 2.05 (m, 1H), 2.00 (s, 3H), 0.94 – 0.84 (m, 6H);  $^{13}\text{C}$  NMR ( $\text{C}_6\text{D}_6$ , 100 MHz,  $\delta$ ): 174.2 (u), 137.3 (u), 133.6 (u), 127.2 (u), 121.1 (dn), 119.8 (dn), 119.6 (dn), 109.0 (u), 109.0 (dn), 60.3 (u), 45.2 (dn), 28.8 (dn), 25.4 (u), 14.3 (dn), 12.6 (dn), 10.3 (dn); IR ( $\text{CHCl}_3$ ,  $\text{cm}^{-1}$ ): 3006, 2969, 2935, 2875, 1723, 1612, 1561, 1472, 1369, 1336, 1251, 1191, 1114, 1022, 754; HRMS-CI ( $\text{NH}_3$ )  $m/z$ :  $[\text{M}^+]$ , calcd for  $\text{C}_{16}\text{H}_{21}\text{NO}_2$ , 259.1572; found 259.1560.

**(R)-(-)-Ethyl 5-methyl-2-(1-benzyl-1H-indol-3-yl)hexanoate (3)**

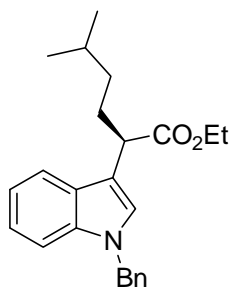

The general procedure for enantioselective indole functionalization was followed starting with 83 mg (0.40 mmol) of 1-benzylindole and 147 mg (0.80 mmol) of ethyl 2-diazo-5-methylhexanoate to give 133 mg (0.37 mmol, 93%) of **3** as a pale yellow oil. The purity was measured to be  $\geq 95\%$  by  $^1\text{H}$  NMR. The enantiomeric excess was measured to be 84% by HPLC analysis. A similar experiment starting with 84 mg (0.41 mmol) of 1-benzylindole and 149 mg (0.80 mmol) of ethyl 2-diazo-5-methylhexanoate gave 141 mg (0.39 mmol, 95%) of **3**. The enantiomeric excess was measured to be 84% by HPLC analysis.  $[\alpha]_{\text{D}}^{19} = -25.5^\circ$  ( $c$ . 1.00  $\text{CHCl}_3$ );  $^1\text{H}$  NMR ( $\text{C}_6\text{D}_6$ , 400 MHz,  $\delta$ ): 8.00 (d,  $J = 7.7$  Hz, 1H), 7.22 – 7.12 (m, 2H), 7.03 (d,  $J = 8.6$  Hz, 1H), 6.99 – 6.91 (m, 4H), 6.78 – 6.70 (m, 2H), 4.67 – 4.58 (m, 2H),<sup>a</sup> 4.07 – 3.89 (m,

3H), 2.40 – 2.29 (m, 1H), 2.08 – 1.97 (m, 1H), 1.53 – 1.45 (m, 1H), 1.40 – 1.20 (m, 2H), 0.90 (t,  $J = 7.0$  Hz, 3H), 0.84 (d,  $J = 6.6$  Hz, 3H), 0.82 (d,  $J = 6.5$  Hz, 3H);  $^{13}\text{C}$  NMR ( $\text{C}_6\text{D}_6$ , 100 MHz,  $\delta$ ): 174.4 (u), 138.1 (u), 137.3 (u), 128.8 (dn), 128.2 (u), 127.6 (dn), 126.8 (dn), 126.4 (dn), 122.4 (dn), 120.2 (dn), 119.9 (dn), 114.3 (u), 110.3 (dn), 60.5 (u), 49.8 (u), 43.8 (dn), 37.5 (u), 31.6 (u), 28.3 (dn), 22.8 (dn), 22.7 (dn), 14.3 (dn); IR ( $\text{CHCl}_3$ ,  $\text{cm}^{-1}$ ): 3019, 2958, 2871, 1724, 1468, 1369, 1335, 1224, 1208, 1176, 1030, 789, 669; HRMS-ESI  $m/z$ :  $[\text{M}+\text{H}]$ , calcd for  $\text{C}_{24}\text{H}_{30}\text{NO}_2$ , 364.2277; found 364.2271.

$^a$ AB-spinsystem:  $\delta_{\text{A}}=4.63$  ppm,  $\delta_{\text{B}}=4.61$  ppm,  $J(\text{AB})=17$  Hz

**(R) -(-)-Ethyl 2-(1-benzyl-2-methyl-1H-indol-3-yl)hexanoate (4)**

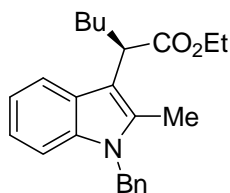

The general procedure for enantioselective indole functionalization was followed on 0.5 $\times$  scale: 44 mg (0.20 mmol) of 1-benzyl-2-methylindole<sup>3</sup> and 68 mg (0.40 mmol) of ethyl 2-diazohexanoate gave 70 mg (0.19 mmol, 95%) of **4** as a yellow oil. The purity was measured to be  $\geq 95\%$  by  $^1\text{H}$  NMR. The enantiomeric excess was measured to be 96% by HPLC analysis. A similar experiment starting with 88 mg (0.40 mmol) of 1-benzyl-2-methylindole and 136 mg (0.80 mmol) of ethyl 2-diazohexanoate gave 136 mg (0.37 mmol, 94%) of **4**. The enantiomeric excess was measured to be 95% by HPLC analysis.  $[\alpha]_{\text{D}}^{18} = -44.3^\circ$  ( $c$ . 1.06  $\text{CHCl}_3$ );  $^1\text{H}$  NMR ( $\text{C}_6\text{D}_6$ , 400 MHz,  $\delta$ ): 8.15 (d,  $J = 8.3$  Hz, 1H), 7.19 (t,  $J = 7.6$  Hz, 1H), 7.14 – 7.09 (m, 1H), 7.00

(t,  $J = 8.0$  Hz, 1H), 6.98 – 6.90 (m, 3H), 6.68 – 6.62 (m, 2H), 4.76 – 4.63 (m, 2H),<sup>a</sup> 4.03 – 3.85 (m, 3H), 2.52 – 2.40 (m, 1H), 2.25 – 2.13 (m, 1H), 2.08 (s, 3H), 1.40 – 1.18 (m, 4H), 0.87 (t,  $J = 7.3$  Hz, 3H), 0.78 (t,  $J = 7.3$  Hz, 3H); <sup>13</sup>C NMR (C<sub>6</sub>D<sub>6</sub>, 100 MHz,  $\delta$ ): 174.2 (u), 138.4 (u), 137.3 (u), 133.6 (u), 128.9 (dn), 127.5 (u), 127.3 (dn), 126.1 (dn), 121.6 (dn), 120.1 (dn), 120.0 (dn), 110.2 (u), 109.4 (dn), 60.4 (u), 46.3 (u), 43.5 (dn), 32.0 (u), 30.5 (u), 23.0 (u), 14.3 (dn) (2 carbons), 10.4 (dn); IR (CHCl<sub>3</sub>, cm<sup>-1</sup>): 3008, 2958, 2931, 2871, 1723, 1607, 1564, 1468, 1369, 1171, 1116, 1027, 740; HRMS-Cl (NH<sub>3</sub>)  $m/z$ : [M<sup>+</sup>], calcd for C<sub>24</sub>H<sub>29</sub>NO<sub>2</sub>, 363.2198; found 363.2203.

<sup>a</sup>AB-spinsystem:  $\delta_A = 4.72$  ppm,  $\delta_B = 4.67$  ppm,  $J(AB) = 18$  Hz

**(R) -(-)-Ethyl 2-(1,2-dimethyl-1H-indol-3-yl)octanoate (5)**

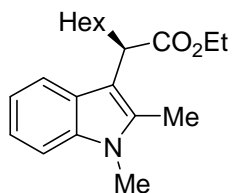

The general procedure for enantioselective indole functionalization was followed with 58 mg (0.40 mmol) of 1,2-dimethylindole and 238 mg (1.20 mmol) of ethyl 2-diazoctanoate to give 105 mg (0.33 mmol, 83%) of **5** as a yellow oil. The purity was measured to be  $\geq 95\%$  by <sup>1</sup>H NMR. The enantiomeric excess was measured to be 95% by HPLC analysis. An identical experiment gave 100 mg (0.32 mmol, 80%) of **5**. The enantiomeric excess was measured to be 96% by HPLC analysis.  $[\alpha]_D^{18} = -52.6^\circ$  (c. 1.06 CHCl<sub>3</sub>); <sup>1</sup>H NMR (C<sub>6</sub>D<sub>6</sub>, 400 MHz,  $\delta$ ): 8.10 – 8.04 (m, 1H), 7.22 – 7.15 (m, 2H), 6.98 – 6.94 (m, 1H), 4.06 – 3.97 (m, 1H), 3.96 – 3.86 (m,



2H), 2.80 (s, 3H), 2.49 – 2.37 (m, 1H), 2.22 – 2.11 (m, 1H), 2.09 (s, 3H), 1.40 – 1.10 (m, 8H), 0.89 (t,  $J = 7.0$  Hz, 3H), 0.81 (t,  $J = 6.6$  Hz, 3H);  $^{13}\text{C}$  NMR ( $\text{C}_6\text{D}_6$ , 100 MHz,  $\delta$ ): 174.3 (u), 137.3 (u), 133.5 (u), 127.3 (u), 121.1 (dn), 119.9 (dn), 119.6 (dn), 109.3 (u), 109.0 (dn), 60.4 (u), 43.6 (dn), 32.4 (u), 32.2 (u), 29.7 (u), 28.8 (dn), 28.3 (u), 23.1 (u), 14.3 (dn) (2 carbons), 10.4 (dn); IR ( $\text{CHCl}_3$ ,  $\text{cm}^{-1}$ ): 3030, 3006, 2959, 2930, 2858, 1723, 1613, 1562, 1471, 1409, 1370, 1336, 1251, 1172, 1118, 1040; HRMS-CI ( $\text{NH}_3$ )  $m/z$ :  $[\text{M}^+]$ , calcd for  $\text{C}_{20}\text{H}_{29}\text{NO}_2$ , 315.2198; found 315.2187.

**(R) -(-)-Ethyl 5-methyl-2-(1-benzyl-2,5-dimethyl-1H-indol-3-yl)hexanoate (6)**

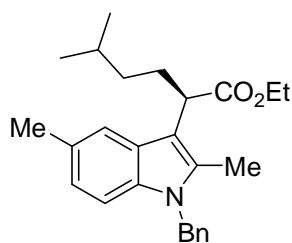

The general procedure for enantioselective indole functionalization was followed with 94 mg (0.40 mmol) of 1-benzyl-2,5-dimethylindole and 147 mg (0.80 mmol) of ethyl 2-diazo-5-methylhexanoate to give 148 mg (0.38 mmol, 95%) of **6** as a yellow oil. The purity was measured to be  $\geq 95\%$  by  $^1\text{H}$  NMR. The enantiomeric excess was measured to be 97% by HPLC analysis. An identical experiment gave 139 mg (0.36 mmol, 90%) of **6**. The enantiomeric excess was measured to be 96% by HPLC analysis.  $[\alpha]_{\text{D}}^{18} = -40.2^\circ$  ( $c$ . 1.00  $\text{CHCl}_3$ );  $^1\text{H}$  NMR ( $\text{C}_6\text{D}_6$ , 400 MHz,  $\delta$ ): 7.95 (s, 1H), 7.00 – 6.88 (m, 5H), 6.65 (d,  $J = 7.0$  Hz, 2H), 4.78 – 4.65 (m, 2H),<sup>a</sup> 4.06 – 3.82 (m, 3H), 2.58 – 2.40 (m, 1H), 2.40 (s, 3H), 2.28 – 2.15 (m, 1H), 2.09 (s, 3H), 1.53 – 1.41 (m, 1H), 1.33 – 1.15 (m, 2H), 0.88 (t,  $J = 7.0$  Hz, 3H), 0.84 (d,  $J = 6.6$  Hz, 3H), 0.79

(d,  $J = 6.7$  Hz, 3H);  $^{13}\text{C}$  NMR ( $\text{C}_6\text{D}_6$ , 100 MHz,  $\delta$ ): 174.2 (u), 138.6 (u), 135.8 (u), 133.7 (u), 128.9 (dn), 128.8 (u), 127.7 (dn), 127.3 (dn), 126.0 (dn), 123.1 (dn), 119.8 (dn), 109.7 (u), 109.2 (dn), 60.4 (u), 46.3 (u), 43.7 (dn), 37.5 (u), 30.1 (u), 28.3 (dn), 22.9 (dn), 22.8 (dn), 21.9 (dn), 14.4 (dn), 10.5 (dn); IR ( $\text{CHCl}_3$ ,  $\text{cm}^{-1}$ ): 3030, 3006, 2956, 2870, 1723, 1581, 1454, 1416, 1370, 1301, 1254, 1178, 1030, 913, 865, 793, 724; HRMS-CI ( $\text{NH}_3$ )  $m/z$ :  $[\text{M}^+]$ , calcd for  $\text{C}_{26}\text{H}_{33}\text{NO}_2$ , 391.2511; found 391.2505.

<sup>a</sup>AB-spinsystem:  $\delta_{\text{A}}=4.74$  ppm,  $\delta_{\text{B}}=4.68$  ppm,  $J(\text{AB})=17$  Hz

**(R) -(-)-Ethyl 5-methyl-2-(1-benzyl-5-fluoro-2-methyl-1H-indol-3-yl)hexanoate (7)**

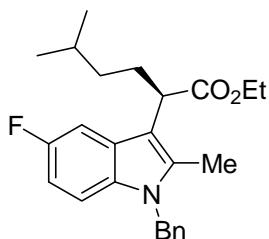

The general procedure for enantioselective indole functionalization was followed with 96 mg (0.40 mmol) of 1-benzyl-5-fluoro-2-methylindole and 147 mg (0.80 mmol) of ethyl 2-diazo-5-methylhexanoate to give 149 mg (0.38 mmol, 95%) of **7** as a yellow oil. The purity was measured to be  $\geq 95\%$  by  $^1\text{H}$  NMR. The enantiomeric excess was measured to be 98% by HPLC analysis. An identical experiment gave 149 mg (0.38 mmol, 95%) of **7**. The enantiomeric excess was measured to be 97% by HPLC analysis.  $[\alpha]_{\text{D}}^{18} = -37^\circ$  ( $c$ . 0.95  $\text{CHCl}_3$ );  $^1\text{H}$  NMR ( $\text{C}_6\text{D}_6$ , 400 MHz,  $\delta$ ): 7.95 (dd,  $J = 9.9$  Hz, 2.2 Hz, 1H), 6.98 – 6.90 (m, 3H), 6.89 – 6.83 (m, 1H), 6.68 (dd,  $J = 8.8$  Hz, 4.2 Hz, 1H), 6.61 – 6.57 (m, 2H), 4.64 – 4.53 (m, 2H), <sup>a</sup> 4.00 – 3.86 (m, 2H), 3.78 (app t,  $J = 7.7$  Hz, 1H), 2.45 – 2.35 (m, 1H), 2.14 – 2.03 (m, 1H), 2.00 (s, 3H), 1.49 –

1.41 (m, 1H), 1.27 – 1.08 (m, 2H), 0.87 (t,  $J = 7.1$  Hz, 3H), 0.81 (d,  $J = 6.6$  Hz, 3H), 0.77 (d,  $J = 6.6$  Hz, 3H);  $^{13}\text{C}$  NMR ( $\text{C}_6\text{D}_6$ , 100 MHz,  $\delta$ ): 173.9 (u), 158.6 (u) [ $d, ^1J(\text{CF}) = 233$  Hz], 138.1 (u), 135.7 (u), 133.8 (u), 129.0 (dn), 127.7 (u) [ $d, ^3J(\text{CF}) = 10$  Hz], 127.5 (dn), 125.9 (dn), 110.2 (u) [ $d, ^4J(\text{CF}) = 4.3$  Hz], 110.1 (dn) [ $d, ^3J(\text{CF}) = 9.7$  Hz], 109.6 (dn) [ $d, ^2J(\text{CF}) = 26$  Hz], 105.3 (dn) [ $d, ^2J(\text{CF}) = 24$  Hz], 60.5 (u), 46.5 (u), 43.7 (dn), 37.3 (u), 29.9 (u), 28.2 (dn), 22.8 (dn), 22.7 (dn), 14.3 (dn), 10.5 (dn); IR ( $\text{CHCl}_3$ ,  $\text{cm}^{-1}$ ): 3030, 2957, 2871, 1723, 1623, 1582, 1482, 1370, 1255, 1216, 1179, 1142, 1031, 915, 860, 768; HRMS-CI ( $\text{NH}_3$ )  $m/z$ :  $[\text{M}^+]$ , calcd for  $\text{C}_{25}\text{H}_{30}\text{NO}_2\text{F}$ , 395.2261; found 395.2260.

$^a\text{AB}$ -spinsystem:  $\delta_{\text{A}}=4.61$  ppm,  $\delta_{\text{B}}=4.57$  ppm,  $J(\text{AB})=17$  Hz

**(R) -(-)-Ethyl 2-(1-benzyl-5-methoxy-2-methyl-1*H*-indol-3-yl)hexanoate (8)**

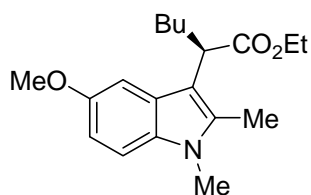

The general procedure for enantioselective indole functionalization was followed with 70 mg (0.40 mmol) of 1-benzyl-5-methoxy-2-methylindole<sup>7</sup> and 136 mg (0.80 mmol) of ethyl diazohexanoate to give 117 mg (0.37 mmol, 93%) of **8** as a pale yellow oil. The purity was measured to be  $\geq 95\%$  by  $^1\text{H}$  NMR. The enantiomeric excess was measured to be 84% by HPLC analysis. An identical experiment gave 118 mg (0.37 mmol, 93%) of **8**. The enantiomeric excess was measured to be 83% by HPLC analysis.  $[\alpha]_{\text{D}}^{19} = -38.5^\circ$  ( $c. 1.00$   $\text{CHCl}_3$ );  $^1\text{H}$  NMR ( $\text{C}_6\text{D}_6$ , 400 MHz,  $\delta$ ): 7.63 (d,  $J = 2.7$  Hz, 1H), 7.07 (dd,  $J = 8.9$  Hz, 2.7 Hz, 1H), 6.85 (d,  $J = 8.9$

Hz, 1H), 4.06 – 3.98 (m, 1H), 3.97 – 3.85 (m, 2H), 3.65 (s, 3H), 2.73 (s, 3H), 2.48 – 2.38 (m, 1H), 2.23 – 2.12 (m, 1H), 2.05 (s, 3H), 1.39 – 1.21 (m, 4H), 0.89 (t,  $J = 7.2$  Hz, 3H), 0.79 (t,  $J = 7.2$  Hz, 3H);  $^{13}\text{C}$  NMR ( $\text{C}_6\text{D}_6$ , 100 MHz,  $\delta$ ): 174.3 (u), 154.8 (u), 134.0 (u), 132.5 (u), 127.5 (u), 111.3 (dn), 109.6 (dn), 108.9 (u), 101.9 (dn), 60.4 (u), 55.4 (dn), 43.6 (dn), 31.9 (u), 30.4 (u), 28.9 (dn), 23.1 (u), 14.4 (dn), 14.3 (dn), 10.5 (dn); IR ( $\text{CHCl}_3$ ,  $\text{cm}^{-1}$ ): 3018, 2958, 1722, 1488, 1456, 1411, 1371, 1216, 1179, 1155, 1031, 759, 668; HRMS-ESI  $m/z$ :  $[\text{M}+\text{H}]$ , calcd for  $\text{C}_{19}\text{H}_{28}\text{NO}_3$ , 318.2056; found 318.2062.

**(R) -(-)-Ethyl 2-(2-methyl-1-phenyl-1H-indol-3-yl)propanoate (9)**

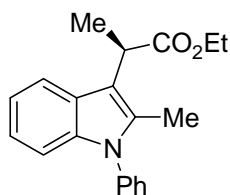

The general procedure for enantioselective indole functionalization was followed with 81 mg (0.39 mmol) of 2-methyl-1-phenylindole<sup>3</sup> and 272 mg (2.13 mmol) of ethyl 2-diazopropanoate to give 94 mg (0.31 mmol, 79%) of **9** as a colorless oil. The purity was measured to be 94% by  $^1\text{H}$  NMR. The enantiomeric excess was measured to be 79% by HPLC analysis. A similar experiment starting with 88 mg (0.43 mmol) of 2-methyl-1-phenylindole and 272 mg (2.13 mmol) of ethyl 2-diazopropanoate gave 111 mg (0.36 mmol, 84%) of **9**. The enantiomeric excess was measured to be 79% by HPLC analysis.  $[\alpha]_D^{19} = -61^\circ$  ( $c$ . 0.87  $\text{CHCl}_3$ );  $^1\text{H}$  NMR ( $\text{C}_6\text{D}_6$ , 400 MHz,  $\delta$ ): 8.05 (d,  $J = 8.0$  Hz, 1H), 7.20 (app t,  $J = 7.0$  Hz, 1H), 7.13 – 7.00 (m, 2H), 7.00 – 6.93 (m, 3H), 6.88 – 6.73 (m, 2H), 4.06 – 3.97 (m, 2H), 3.97 – 3.87 (m, 1H), 2.07 (s, 3H), 1.74 (d,  $J = 7.4$  Hz, 3H), 0.88 (t,  $J = 7.7$  Hz, 3H);  $^{13}\text{C}$  NMR ( $\text{C}_6\text{D}_6$ , 100 MHz,  $\delta$ ): 174.6 (u),

138.3 (u) (2 carbons), 133.1 (u), 129.5 (dn), 128.5 (dn), 127.6 (dn), 127.3 (u), 121.9 (dn), 120.5 (dn), 119.6 (dn), 112.6 (u), 110.5 (dn), 60.6 (u), 37.4 (dn), 17.9 (dn), 14.3 (dn), 11.1 (dn); IR (CHCl<sub>3</sub>, cm<sup>-1</sup>): 3019, 2983, 1723, 1598, 1501, 1461, 1370, 1325, 1216, 1093, 774, 700, 669; HRMS-ESI m/z: [M+H], calcd for C<sub>20</sub>H<sub>22</sub>NO<sub>2</sub>, 308.1651; found 308.1644.

**(R) -(-)-Ethyl 2-(2-methyl-1-phenyl-1*H*-indol-3-yl)hexanoate (10)**

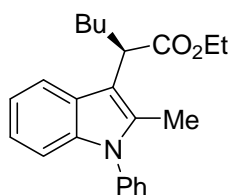

The general procedure for enantioselective indole functionalization was followed with 82 mg (0.40 mmol) of 2-methyl-1-phenylindole<sup>3</sup> and 135 mg (0.80 mmol) of ethyl 2-diazohehexanoate to give 134 mg (0.38 mmol, 95%) of **10** as a colorless oil. The purity was measured to be  $\geq 95\%$  by <sup>1</sup>H NMR. The enantiomeric excess was measured to be 98% by HPLC analysis. A similar experiment starting with 84 mg (0.41 mmol) of 2-methyl-1-phenylindole and 138 mg (0.81 mmol) of ethyl 2-diazohehexanoate gave 136 mg (0.39 mmol, 95%) of **10**. The enantiomeric excess was measured to be 99% by HPLC analysis.  $[\alpha]_D^{19} = -64.2^\circ$  (c. 1.00 CHCl<sub>3</sub>); <sup>1</sup>H NMR (C<sub>6</sub>D<sub>6</sub>, 400 MHz,  $\delta$ ): 8.18 (d,  $J = 8.0$  Hz, 1H), 7.23 – 7.18 (m, 1H), 7.15 – 7.03 (m, 2H), 7.02 – 6.93 (m, 3H), 6.90 – 6.75 (m, 2H), 4.10 – 4.00 (m, 1H), 3.99 – 3.87 (m, 2H), 2.57 – 2.45 (m, 1H), 2.26 – 2.15 (m, 1H), 2.15 (s, 3H), 1.42 – 1.22 (m, 4H), 0.89 (t,  $J = 7.2$  Hz, 3H), 0.81 (t,  $J = 7.2$  Hz, 3H); <sup>13</sup>C NMR (C<sub>6</sub>D<sub>6</sub>, 100 MHz,  $\delta$ ): 174.1 (u), 138.4 (u), 133.8 (u), 129.5 (dn), 128.5 (dn), 128.4 (u), 127.7 (u), 127.6 (dn), 121.9 (dn), 120.6 (dn), 120.1 (dn), 111.1 (u), 110.5 (dn), 60.5 (u), 43.7 (dn), 32.1 (u), 30.6 (u), 23.1 (u), 14.4 (dn), 14.3 (dn), 11.4 (dn); IR (CHCl<sub>3</sub>, cm<sup>-1</sup>):

3019, 2960, 1723, 1501, 1461, 1370, 1216, 1180, 762, 700, 669; HRMS-ESI  $m/z$ :  $[M+Na]$ , calcd for  $C_{23}H_{27}NO_2Na$ , 372.1939; found 372.1935.

**(R)-(-)-Ethyl 5-methyl-2-(1-phenyl-1*H*-indol-3-yl)hexanoate (**11**)**

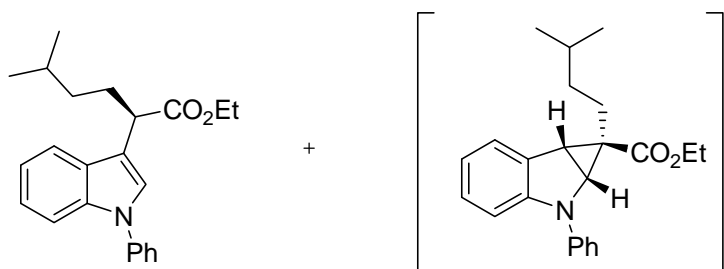

The general procedure for enantioselective indole functionalization was followed with 74 mg (0.38 mmol) of 1-phenylindole<sup>2</sup> and 141 mg (0.77 mmol) of ethyl 2-diazo-5-methylhexanoate to give 112 mg (0.32 mmol, 84%) of **11** which contained < 5% of the product of cyclopropanation as a colorless oil. The purity was measured to be  $\geq 95\%$  by  $^1H$  NMR. The enantiomeric excess was measured to be 97% by HPLC analysis. A similar experiment starting with 81 mg (0.42 mmol) of 1-phenylindole and 155 mg (0.84 mmol) of ethyl 2-diazo-5-methylhexanoate gave 121 mg (0.37 mmol, 88%) of **11**. The enantiomeric excess was measured to be 98% by HPLC analysis.  $[\alpha]_D^{19} = -25^\circ$  (*c.* 0.92  $CHCl_3$ );  $^1H$  NMR ( $C_6D_6$ , 400 MHz,  $\delta$ ): 8.02 (d,  $J = 7.8$  Hz, 1H), 7.44 (d,  $J = 8.9$  Hz, 1H), 7.26 – 7.20 (m, 2H), 7.18 – 7.15 (m, 1H), 7.08 – 6.97 (m, 4H), 6.95 – 6.89 (m, 1H), 4.07 – 3.90 (m, 3H), 2.46 – 2.36 (m, 1H), 2.11 – 2.00 (m, 1H), 1.58 – 1.47 (m, 1H), 1.42 – 1.28 (m, 2H), 0.91 (t,  $J = 7.6$  Hz, 3H), 0.86 (d,  $J = 6.5$  Hz, 3H), 0.84 (d,  $J = 7.0$  Hz, 3H);  $^{13}C$  NMR ( $C_6D_6$ , 100 MHz,  $\delta$ ): 174.2 (u), 140.0 (u), 136.7 (u), 129.7 (dn), 128.9 (u), 126.3 (dn), 126.0 (dn), 124.5 (dn), 123.1 (dn), 120.8 (dn), 120.3 (dn), 116.3 (u), 111.1 (dn), 60.6 (u), 43.8 (dn), 37.5 (u), 31.5 (u), 28.4 (dn), 22.8 (dn), 22.7 (dn), 14.3 (dn); IR ( $CHCl_3$ ,  $cm^{-1}$ ): 3019,

2958, 1725, 1598, 1502, 1458, 1379, 1216, 1179, 1138, 748, 669; HRMS-ESI  $m/z$ :  $[M+H]$ , calcd for  $C_{23}H_{28}NO_2$ , 350.2120; found 350.2111.

**(R)-(-)-Ethyl 2-(1-(4-bromophenyl)-1H-indol-3-yl)hexanoate (12)**

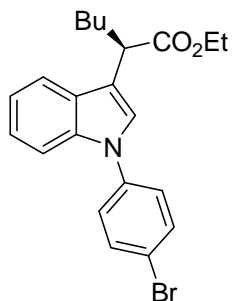

The general procedure for enantioselective indole functionalization was followed with 106 mg (0.39 mmol) of 1-(4-bromophenyl)indole<sup>4</sup> and 133 mg (0.78 mmol) of ethyl 2-diazohehexanoate to give 157 mg (0.38 mmol, 97%) of **12** as a colorless oil. The purity was measured to be 95% by <sup>1</sup>H NMR. The enantiomeric excess was measured to be 91% by HPLC analysis. A similar experiment starting with 107 mg (0.39 mmol) of 1-(4-bromophenyl)indole and 134 mg (0.78 mmol) of ethyl 2-diazohehexanoate gave 148 mg (0.36 mmol, 92%) of **12**. The enantiomeric excess was measured to be 89% by HPLC analysis.  $[\alpha]_D^{19} = -13.7^\circ$  (c. 1.00  $CHCl_3$ ); <sup>1</sup>H NMR ( $C_6D_6$ , 400 MHz,  $\delta$ ): 7.98 (d,  $J = 8.2$  Hz, 1H), 7.26 (d,  $J = 7.6$  Hz, 1H), 7.25 – 7.19 (m, 1H), 7.16 – 7.08 (m, 4H), 6.64 (d,  $J = 9.4$  Hz, 2H), 4.10 – 3.97 (m, 2H), 3.97 – 3.89 (m, 1H), 2.42 – 2.28 (m, 1H), 2.07 – 1.96 (m, 1H), 1.46 – 1.23 (m, 4H), 0.93 (t,  $J = 7.6$  Hz, 3H), 0.82 (t,  $J = 7.6$  Hz, 3H) (minor impurities detected at 7.33 ppm, 6.91 ppm, 6.86 ppm, 4.22 ppm, 3.23 ppm, 1.08 ppm, 0.70 ppm, and 0.60 ppm); <sup>13</sup>C NMR ( $C_6D_6$ , 100 MHz,  $\delta$ ): 174.1 (u), 138.8 (u), 136.4 (u), 132.7 (dn), 128.9 (u), 125.9 (dn), 125.6 (dn), 123.3 (dn), 121.0 (dn), 120.4 (dn), 119.6 (u), 116.6

(u), 110.9 (dn), 60.7 (u), 43.4 (dn), 33.4 (u), 30.5 (u), 23.0 (u), 14.3 (dn), 14.1 (dn); IR (CHCl<sub>3</sub>, cm<sup>-1</sup>): 3019, 2960, 2932, 1725, 1591, 1494, 1458, 1380, 1215, 1178, 1072, 1012, 832, 760, 669; HRMS-ESI m/z: [M+H], calcd for C<sub>22</sub>H<sub>25</sub>NO<sub>2</sub><sup>79</sup>Br, 414.1069; found 414.1061.

**(R)-(-)-Methyl 3-(1-ethoxy-1-oxobutan-2-yl)-1-phenyl-1H-indole-6-carboxylate (13)**

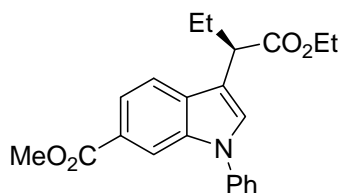

The general procedure for enantioselective indole functionalization was followed with 126 mg (0.50 mmol) of methyl 1-phenyl-1H-indole-6-carboxylate and 142 mg (1.00 mmol) of ethyl 2-diazobutanoate to give 158 mg (0.43 mmol, 86%) of **13** as a yellow oil. The purity was measured to be > 95% by <sup>1</sup>H NMR. The enantiomeric excess was measured to be 87% by HPLC analysis. An identical experiment gave 155 mg (0.42 mmol, 84%) of **13**. The enantiomeric excess was measured to be 88% by HPLC analysis. [α]<sub>D</sub><sup>22</sup> = -20.8° (c. 1.00 CHCl<sub>3</sub>); <sup>1</sup>H NMR (C<sub>6</sub>D<sub>6</sub>, 400 MHz, δ): 8.56 (s, 1H), 8.28 (dd, *J* = 8.4 Hz, 1.5 Hz, 1H), 7.89 (dd, *J* = 8.41 Hz, 0.39 Hz, 1H), 7.28 (s, 1H), 7.02 – 6.87 (m, 5H), 4.03 – 3.88 (m, 2H), 3.84 (dd, *J* = 8.5 Hz, 6.8 Hz, 1H), 3.52 (s, 3H), 2.32 – 2.20 (m, 1H), 1.98 – 1.86 (m, 1H), 0.96 (t, *J* = 7.3 Hz, 3H), 0.90 (t, *J* = 7.0 Hz, 3H); <sup>13</sup>C NMR (C<sub>6</sub>D<sub>6</sub>, 100 MHz, δ): 173.8 (u), 167.6 (u), 139.2 (u), 136.1 (u), 132.1 (u), 129.8 (dn), 129.2 (dn), 126.8 (dn), 125.4 (u), 124.6 (dn), 121.9 (dn), 120.0 (dn), 116.1 (u), 113.4 (dn), 60.7 (u), 51.6 (dn), 44.9 (dn), 26.7 (u), 14.3 (dn), 12.5 (dn); IR (CHCl<sub>3</sub>, cm<sup>-1</sup>): 3028, 2967, 2876, 1724, 1713, 1599, 1502, 1448, 1384, 1301, 1248, 1216, 1180, 1022, 697; HRMS-ESI m/z: [M+Na], calcd for C<sub>22</sub>H<sub>23</sub>NO<sub>4</sub>Na, 388.1525; found 388.1507.



**(R)-(-)-Ethyl 2-(1-(4-(*tert*-butoxycarbonyl)phenyl)-2-methyl-1*H*-indol-3-yl)-5-methylhexanoate (14)**

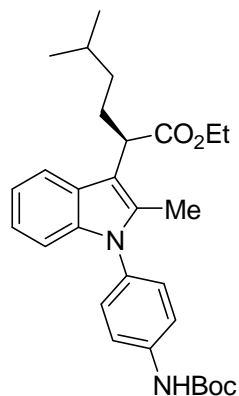

The general procedure for enantioselective indole functionalization was followed with 63 mg (0.20 mmol) of *tert*-butyl 4-(2-methyl-1*H*-indol-1-yl)phenylcarbamate and 180 mg (1.0 mmol) of ethyl 2-diazo-5-methylhexanoate to give 80 mg (0.17 mmol, 85%) of **14** as a white solid, m.p. 63 – 67 °C. The purity was measured to be > 95% by <sup>1</sup>H NMR. The enantiomeric excess was measured to be 97% by HPLC analysis. A similar experiment starting with 62 mg (0.19 mmol) of *tert*-butyl 4-(2-methyl-1*H*-indol-1-yl)phenylcarbamate and 177 mg (0.96 mmol) of ethyl 2-diazo-5-methylhexanoate gave 80 mg (0.17 mmol, 89%) of **14**. The enantiomeric excess was measured to be 96% by HPLC analysis.  $[\alpha]_D^{22} = -49.3^\circ$  (*c.* 1.00 CHCl<sub>3</sub>); <sup>1</sup>H NMR (CD<sub>2</sub>Cl<sub>2</sub>, 400 MHz,  $\delta$ ): 7.73 – 7.69 (m, 1H), 7.57 – 7.53 (m, 2H), 7.28 – 7.23 (m, 2H), 7.08 – 7.01 (m, 3H), 6.80 (s, 1H), 4.20 – 4.11 (m, 1H), 4.10 – 4.01 (m, 1H), 3.80 (app t, *J* = 7.6 Hz, 1H), 2.33 – 2.23 (m, 1H), 2.24 (s, 3H), 2.02 – 1.90 (m, 1H), 1.61 – 1.53 (m, 1H), 1.54 (s, 9H), 1.28 – 1.12 (m, 2H), 1.21 (t, *J* = 7.1 Hz, 3H), 0.89 (d, *J* = 6.5 Hz, 3H), 0.87 (d, *J* = 6.5 Hz, 3H); <sup>13</sup>C NMR (CD<sub>2</sub>Cl<sub>2</sub>, 100 MHz,  $\delta$ ): 174.6 (u), 152.9 (u), 138.6 (u), 138.1 (u), 134.7 (u), 132.7 (u), 129.1 (dn), 127.1 (u), 121.3 (dn), 119.8 (dn), 119.6 (dn), 119.3 (dn), 110.2 (u), 110.1 (dn), 81.0 (u), 60.8 (u), 43.7 (dn), 37.3 (u), 29.8 (u), 28.4 (dn), 22.8 (dn, 2 carbons [signals resolved in C<sub>6</sub>D<sub>6</sub>]), 22.6 (dn),

14.4 (dn), 11.3 (dn); IR (CHCl<sub>3</sub>, cm<sup>-1</sup>): 3437, 3349 (br), 3009, 2958, 2871, 1724, 1594, 1522, 1462, 1410, 1369, 1309, 1230, 1157, 1054, 1018; HRMS-ESI m/z: [M+Na], calcd for C<sub>29</sub>H<sub>38</sub>N<sub>2</sub>O<sub>4</sub>Na, 501.2729; found 501.2723.

**(R)-(-)-Ethyl 2-(1-(4-(*tert*-butyldimethylsilyloxy)phenyl)-2-methyl-1*H*-indol-3-yl)hexanoate**  
**(15)**

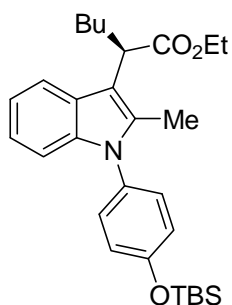

The general procedure for enantioselective indole functionalization was followed with 134 mg (0.40 mmol) of 1-(4-(*tert*-butyldimethylsilyloxy)phenyl)-2-methyl-1*H*-indole and 135 mg (0.80 mmol) of ethyl 2-diazohehexanoate to give 172 mg (0.36 mmol, 90%) of **15** as a pale yellow oil. The purity was measured to be 90% by <sup>1</sup>H NMR. The enantiomeric excess was measured to be 87% by HPLC analysis. A similar experiment starting with 127 mg (0.38 mmol) of 1-(4-(*tert*-butyldimethylsilyloxy)phenyl)-2-methyl-1*H*-indole and 128 mg (0.76 mmol) of ethyl 2-diazohehexanoate gave 170 mg (0.35 mmol, 92%) of **15**. The enantiomeric excess was measured to be 85% by HPLC analysis.  $[\alpha]_D^{22} = -40.0^\circ$  (c. 1.00 CHCl<sub>3</sub>); <sup>1</sup>H NMR (CDCl<sub>3</sub>, 400 MHz,  $\delta$ ): 7.79 – 7.76 (m, 1H), 7.19 (app d, *J* = 8.6 Hz, 2H), 7.12 – 7.01 (m, 3H), 6.97 (app d, *J* = 8.9 Hz, 2H), 4.23 – 4.15 (m, 1H), 4.13 – 4.04 (m, 1H), 3.82 (app t, *J* = 8.0 Hz, 1H), 2.35 – 2.25 (m, 1H), 2.26 (s, 3H), 2.05 – 1.92 (m, 1H), 1.40 – 1.26 (m, 4H), 1.23 (t, *J* = 7.2 Hz, 3H), 1.04 (s, 9H), 0.88

(t,  $J = 7.0$  Hz, 3H), 0.28 (s, 6H);  $^{13}\text{C}$  NMR ( $\text{CDCl}_3$ , 100 MHz,  $\delta$ ): 174.5 (u), 155.2 (u), 137.8 (u), 134.4 (u), 131.1 (u), 129.4 (dn), 126.7 (u), 120.8 (dn), 120.6 (dn), 119.4 (dn), 119.3 (dn), 109.9 (dn), 109.7 (u), 60.4 (u), 43.3 (dn), 31.4 (u), 30.1 (u), 25.6 (dn), 22.6 (u), 18.2 (u), 14.3 (dn), 14.0 (dn), 11.2 (dn),  $-4.39$  (dn); IR ( $\text{CHCl}_3$ ,  $\text{cm}^{-1}$ ): 3008, 2959, 2932, 2861, 1723, 1609, 1512, 1463, 1179, 1163, 1117, 1098, 1022, 914, 844; HRMS-ESI  $m/z$ :  $[\text{M}+\text{H}]$ , calcd for  $\text{C}_{29}\text{H}_{42}\text{NO}_3\text{Si}$ , 480.2934; found 480.2929.

**(R) -(-)-Ethyl 2-(2,3-dihydropyrrolo[1,2-a]indol-9-yl)hexanoate (16)**

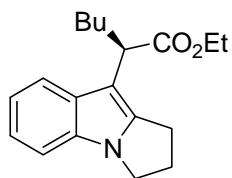

A dry round bottomed flask was charged with 3 mg (0.002 mmol) of  $\text{Rh}_2(\text{S-NTTL})_4$  and 63 mg (0.40 mmol) of dihydro-3H-pyrrolo[1,2- $\alpha$ ]indole,<sup>5</sup> and the flask was evacuated and filled with nitrogen. Anhydrous toluene (2.0 mL) was added and the flask was cooled by a bath of dry ice/acetone ( $-78$  °C). Ethyl 2-diazoheptanoate (68 mg, 0.40 mmol) was dissolved in anhydrous toluene (1.2 mL) and added to the reaction mixture via syringe pump at a rate of 1 mL/h. After the addition was complete, the mixture was allowed to warm to ambient temperature. The solvent was subsequently evaporated and the residue was chromatographed on silica gel to give 97 mg (0.32 mmol, 80%) of **16** as a yellow oil. The purity was measured to be  $\geq 95\%$  by  $^1\text{H}$  NMR. The enantiomeric excess was measured to be 95% by HPLC analysis. A similar experiment starting with 65 mg (0.41 mmol) of dihydro-3H-pyrrolo[1,2- $\alpha$ ]indole and 70 mg (0.41 mmol) of ethyl 2-diazoheptanoate gave 105 mg (0.35 mmol, 85%) of **16**. The enantiomeric

excess was measured to be 94% by HPLC analysis.  $[\alpha]_D^{19} = -43^\circ$  (c. 0.98  $\text{CHCl}_3$ );  $^1\text{H NMR}$  ( $\text{C}_6\text{D}_6$ , 400 MHz,  $\delta$ ): 7.97 (app d,  $J = 7.3$  Hz, 1H), 7.28 – 7.18 (m, 2H), 7.03 (app d,  $J = 8.0$  Hz, 1H), 4.08 – 3.99 (m, 2H), 3.97 – 3.88 (m, 1H), 3.21 – 3.12 (m, 2H), 2.90 – 2.80 (m, 1H), 2.75 – 2.65 (m, 1H), 2.43 – 2.32 (m, 1H), 2.11 – 2.00 (m, 1H), 1.80 – 1.72 (m, 2H), 1.48 – 1.22 (m, 4H), 0.90 (t,  $J = 7.3$  Hz, 3H), 0.85 (t,  $J = 7.2$  Hz, 3H);  $^{13}\text{C NMR}$  ( $\text{C}_6\text{D}_6$ , 100 MHz,  $\delta$ ): 174.4 (u), 141.7 (u), 133.1 (u), 132.7 (u), 120.8 (dn), 119.6 (dn), 119.5 (dn), 109.7 (dn), 104.1 (u), 60.3 (u), 43.2 (dn), 43.0 (u), 32.4 (u), 30.5 (u), 27.4 (u), 24.4 (u), 23.1 (u), 14.4 (dn), 14.3 (dn); IR ( $\text{CHCl}_3$ ,  $\text{cm}^{-1}$ ): 3019, 2959, 2874, 1722, 1479, 1461, 1376, 1299, 1216, 1180, 1033, 740, 669; HRMS-CI ( $\text{NH}_3$ )  $m/z$ :  $[\text{M}+\text{H}]$ , calcd for  $\text{C}_{19}\text{H}_{26}\text{NO}_2$ , 300.1964; found 300.1959.

**(R) -(-)-Ethyl 5-methyl-2-(6,7,8,9-tetrahydropyrido[1,2-a]indol-10-yl)hexanoate (17)**

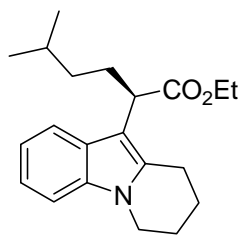

A dry round bottomed flask was charged with 3 mg  $\text{Rh}_2(\text{S-NTTL})_4$  and 73 mg (0.43 mmol) of 6,7,8,9-tetrahydropyrido[1,2- $\alpha$ ]indole,<sup>6</sup> and the flask was evacuated and filled with nitrogen. Anhydrous toluene (2.0 mL) was added and the flask was cooled by a bath of dry ice/acetone ( $-78^\circ\text{C}$ ). Ethyl 2-diazo-5-methylhexanoate (73 mg, 0.43 mmol) was dissolved in 1.2 mL of anhydrous toluene and the solution was added to the reaction mixture at a rate of 1 mL/hr. After addition was complete the reaction mixture was allowed to warm to ambient temperature. The solvent was subsequently evaporated and the residue was chromatographed on silica gel to give

94 mg (0.29 mmol, 67%) of **17** as a pale yellow oil. The purity was measured to be  $\geq 95\%$  by  $^1\text{H}$  NMR. The enantiomeric excess was measured to be 95% by HPLC analysis. A similar experiment starting with 74 mg (0.43 mmol) of 6,7,8,9-tetrahydropyrido[1,2- $\alpha$ ]indole and 80 mg (0.43 mmol) of ethyl 2-diazo-5-methylhexanoate gave 100 mg (0.31 mmol, 72%) of **17**. The enantiomeric excess was measured to be 95% by HPLC analysis.  $[\alpha]_{\text{D}}^{19} = -50^\circ$  (c. 0.71  $\text{CHCl}_3$ );  $^1\text{H}$  NMR ( $\text{C}_6\text{D}_6$ , 400 MHz,  $\delta$ ): 8.16 (app d,  $J = 7.8$  Hz, 1H), 7.30 – 7.20 (m, 2H), 7.05 (app d,  $J = 7.5$  Hz, 1H), 4.08 – 3.97 (m, 1H), 3.95 – 3.84 (m, 2H), 3.32 – 3.20 (m, 2H), 2.85 – 2.72 (m, 2H), 2.53 – 2.44 (m, 1H), 2.23 – 2.14 (m, 1H), 1.57 – 1.45 (m, 1H), 1.39 – 1.20 (m, 6H), 1.97 – 1.82 (m, 6H), 0.79 (d,  $J = 6.6$  Hz, 3H);  $^{13}\text{C}$  NMR ( $\text{C}_6\text{D}_6$ , 100 MHz,  $\delta$ ): 174.2 (u), 136.8 (u), 133.7 (u), 127.5 (u), 120.8 (dn), 120.0 (dn), 119.9 (dn), 109.0 (dn), 107.8 (u), 60.4 (u), 43.4 (dn), 41.9 (u), 37.5 (u), 30.1 (u), 28.4 (dn), 23.1 (u), 23.0 (u), 22.9 (dn), 22.7 (dn), 21.1 (u), 14.4 (dn); IR ( $\text{CHCl}_3$ ,  $\text{cm}^{-1}$ ): 3019, 2956, 2871, 1722, 1462, 1422, 1367, 1330, 1317, 1216, 1175, 1163, 1117, 1034, 750, 669; HRMS-CI ( $\text{NH}_3$ )  $m/z$ :  $[\text{M}+\text{H}]$ , calcd for  $\text{C}_{21}\text{H}_{30}\text{NO}_2$ , 328.2277; found 328.2274.

**(R) -(-)-Methyl 2-(1-(3-bromobenzyl)-2-methyl-1H-indol-3-yl)butanoate (G)**

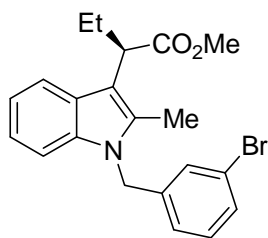

General procedure I was followed with 120 mg (0.40 mmol) of 1-(3-bromobenzyl)-2-methylindole and 96 mg (0.75 mmol) of methyl 2-diazobutanoate to give 141 mg (0.35 mmol, 88%) of **G** as a white solid, m.p. 102 – 103 °C. The purity was measured to be  $\geq 95\%$  by  $^1\text{H}$

NMR. The enantiomeric excess was measured to be 88% by HPLC analysis.  $[\alpha]_D^{18} = -49^\circ$  (c. 0.98 CHCl<sub>3</sub>); <sup>1</sup>H NMR (C<sub>6</sub>D<sub>6</sub>, 400 MHz, δ): 8.03 (d, *J* = 8.1 Hz, 1H), 7.20 – 7.04 (m, 2H), 7.00 (d, *J* = 8.1 Hz, 1H), 6.94 (s, 1H), 6.89 (d, *J* = 8.5 Hz, 1H), 6.44 (t, *J* = 8.1 Hz, 1H), 6.28 (d, *J* = 7.6 Hz, 1H), 4.53 – 4.41 (m, 2H),<sup>a</sup> 3.69 (dd, *J* = 9.0 Hz, 7.2 Hz, 1H), 3.30 (s, 3H), 2.44 – 2.33 (m, 1H), 2.18 – 2.06 (m, 1H), 1.91 (s, 3H), 0.84 (t, *J* = 7.6 Hz, 3H); <sup>13</sup>C NMR (C<sub>6</sub>D<sub>6</sub>, 100 MHz, δ): 174.4 (u), 140.8 (u), 137.1 (u), 133.5 (u), 130.6 (dn), 130.5 (dn), 129.3 (dn), 127.4 (u), 124.4 (dn), 123.1 (u), 121.8 (dn), 120.3 (dn), 120.1 (dn), 110.0 (u), 109.2 (dn), 51.3 (dn), 45.6 (u), 44.8 (dn), 25.3 (u), 12.5 (dn), 10.2 (dn); IR (Thin film, cm<sup>-1</sup>): 3050, 2964, 2873, 1732, 1596, 1571, 1468, 1429, 1337, 1197, 1167, 1003, 772, 742; HRMS-ESI *m/z*: [M+H], calcd for C<sub>21</sub>H<sub>23</sub>NO<sub>2</sub><sup>79</sup>Br, 400.0912; found 400.0907.

<sup>a</sup>AB-spinsystem: δ<sub>A</sub>=4.49 ppm, δ<sub>B</sub>=4.45 ppm, *J*(AB)=18 Hz

## References

- 1 Taber, D. F.; Sheth, R. B. Joshi, P. V. *J. Org. Chem.* **2005**, *70*, 2851.
- 2 Antilla, J. C.; Klapars, A.; Buchwald, S. L. *J. Am. Chem. Soc.* **2002**, *124*, 11684.
- 3 Roy, S.; Gribble, G. W. *Heterocycles* **2006**, *70*, 51.
- 4 Tao, C. Z.; Li, J.; Cui, X.; Fu, Y.; Guo, Q. X. *Chin. Chem. Lett.* **2007**, *18*, 1199.
- 5 Jones, G. B.; Guzel, M.; Mathews, J. E. *Tetrahedron Lett.* **2000**, *41*, 1123.
- 6 Caddick, S.; Aboutayab, K.; Jenkins, K.; West, R. I. *J. Chem. Soc., Perkin Trans. 1* **1996**, 675.
- 7 Ferrer, S.; Naughton, D. P.; Threadgill, M. D. *Tetrahedron* **2003**, *59*, 3445.
- 8 Müller, P.; Allenbach, Y.; Robert, E. *Tetrahedron: Asymmetry* **2003**, *14*, 779.
- 9 Watanabe, N.; Ogawa, T.; Ohtake, S.; Ikegami, S.; Hashimoto, S. *Synlett* **1996**, 85.
- 10 Yamawaki, M.; Tsutsui, H.; Kitagaki, S.; Anada, M.; Hashimoto, S. *Tetrahedron Lett.* **2002**, *42*, 9561.

- 11 Cotton, F. A., Felthouse, T. R., *Inorg. Chem.* **1980**, 19, 323-328.
- 12 Hu, L.,-Y.; Ryder, T. R.; Rafferty, M. F.; Taylor, C. P.; Feng, M. R.; Kuo, B.,-S.; Lotarski, S. M.; Miljanich, G. P.; Millerman, E.; Siebers, K. M.; Szoke, B. G. *Bioorg. Med. Chem.* **2000**, 1203.
- 13 Figadere, B.; Norman, A. W.; Henry, H. L.; Koeffler, H. P.; Zhou, J. Y.; Okamura, W. H. *J. Med. Chem.* **1991**, 34, 2452.

**<sup>1</sup>H NMR of A (400 MHz, C<sub>6</sub>D<sub>6</sub>)**

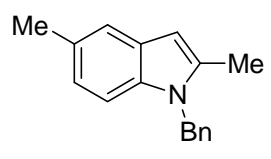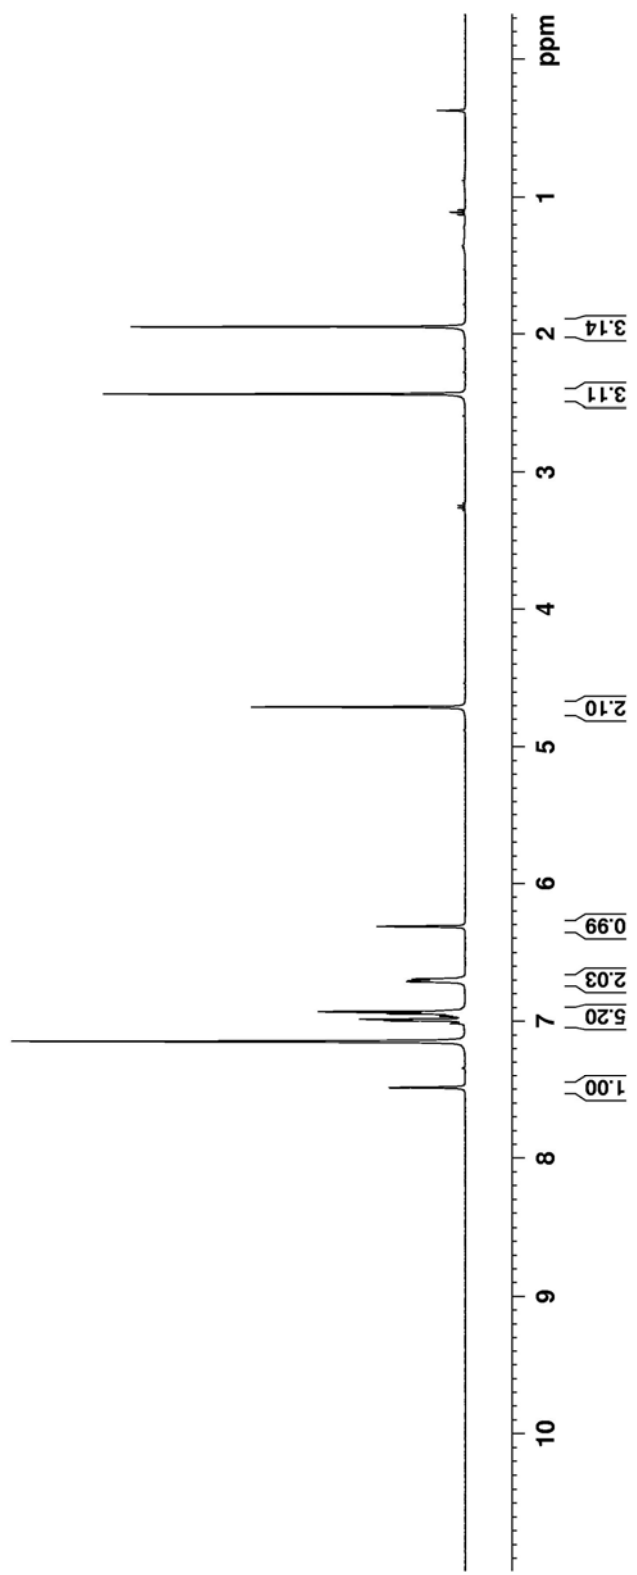



<sup>13</sup>C NMR spectrum of A (100 MHz, C<sub>6</sub>D<sub>6</sub>)

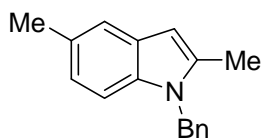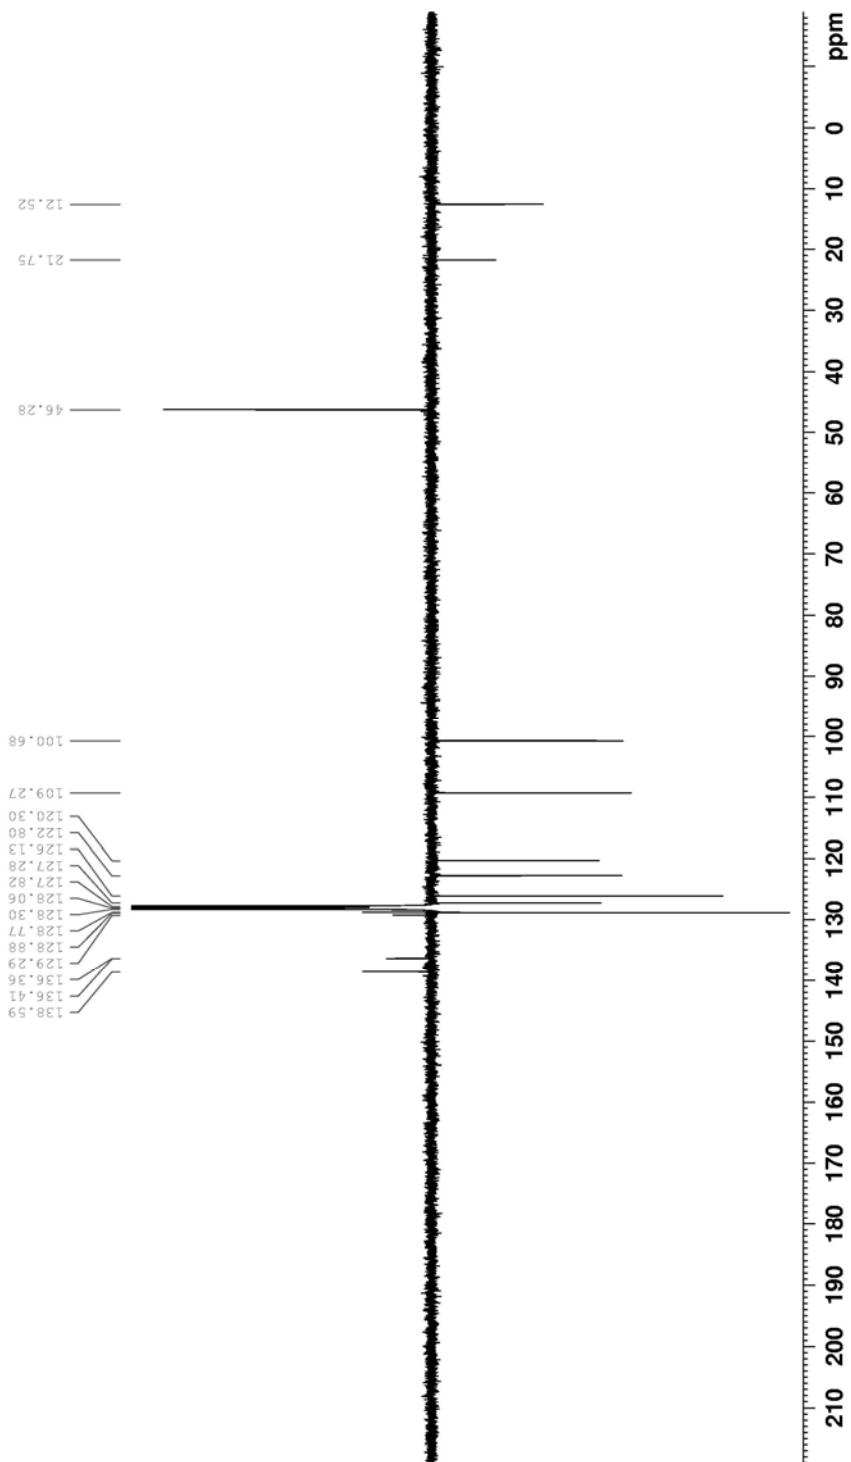

**<sup>1</sup>H NMR of B (400 MHz, C<sub>6</sub>D<sub>6</sub>)**

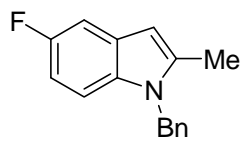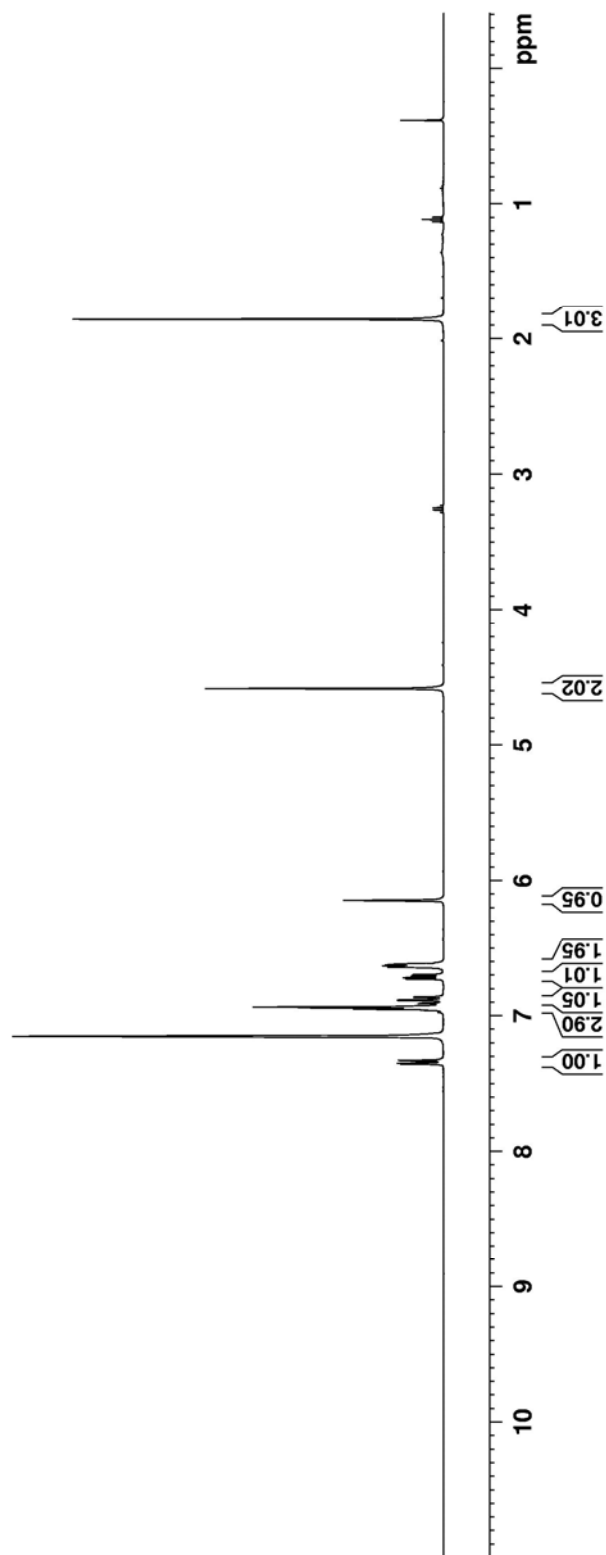

<sup>13</sup>C NMR spectrum of B (100 MHz, CDCl<sub>3</sub>)

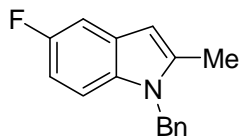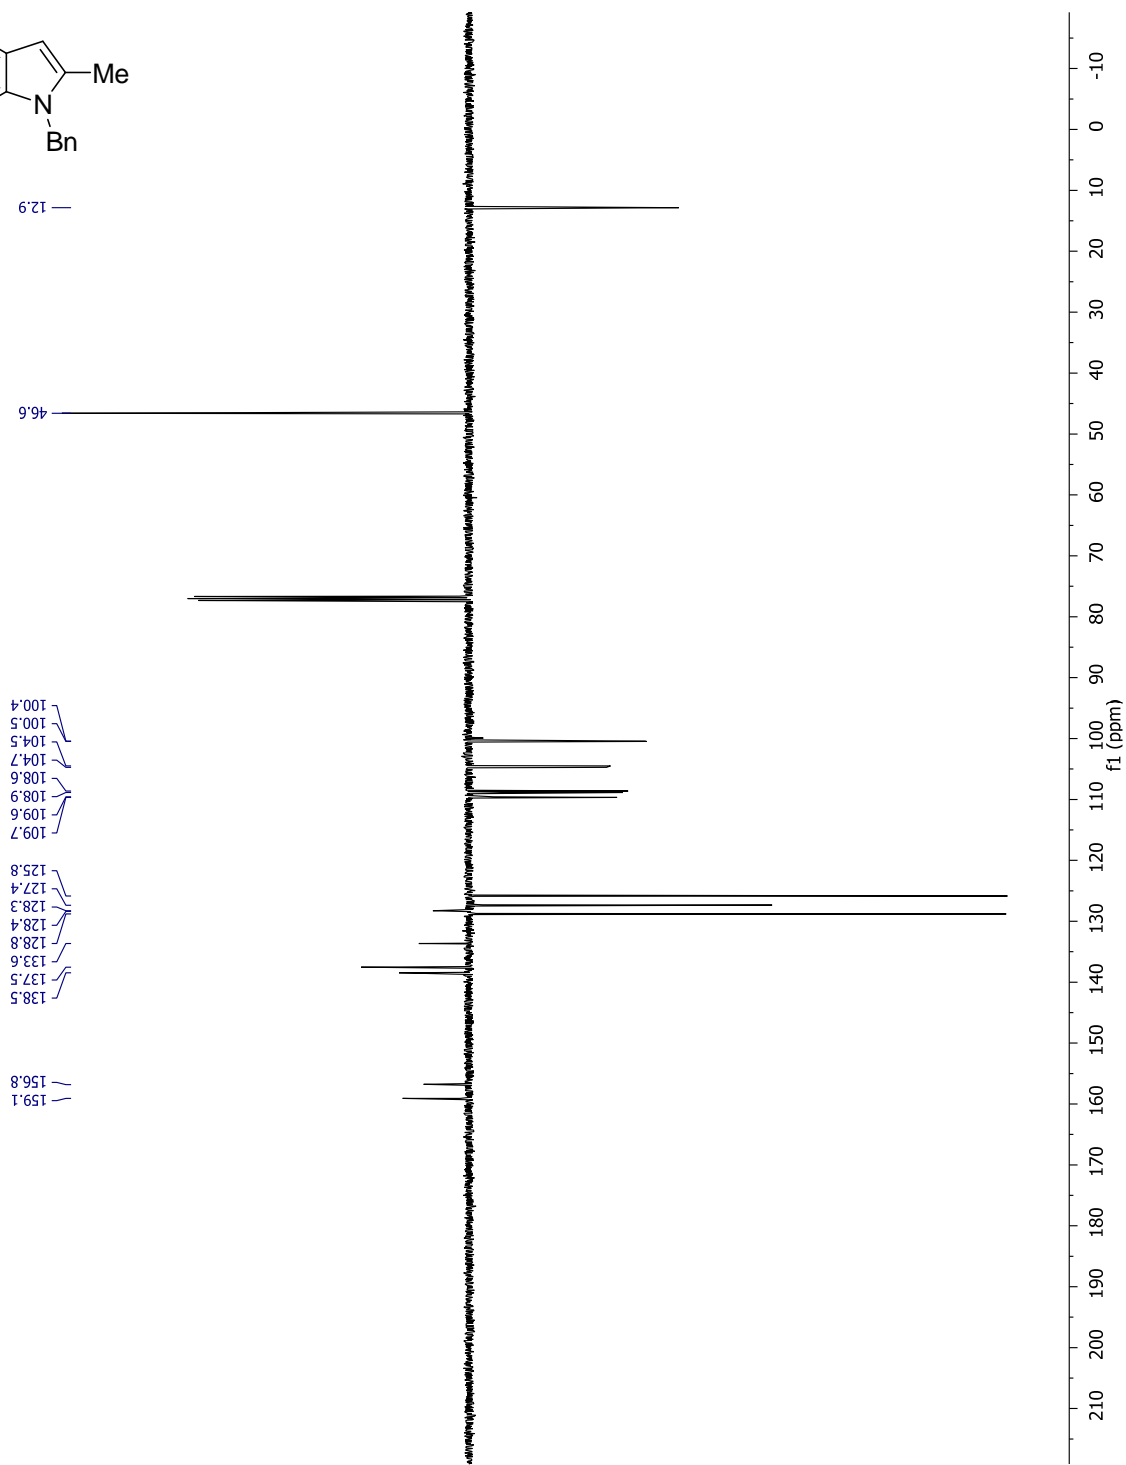

<sup>1</sup>H NMR of C (400 MHz, C<sub>6</sub>D<sub>6</sub>)

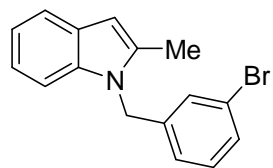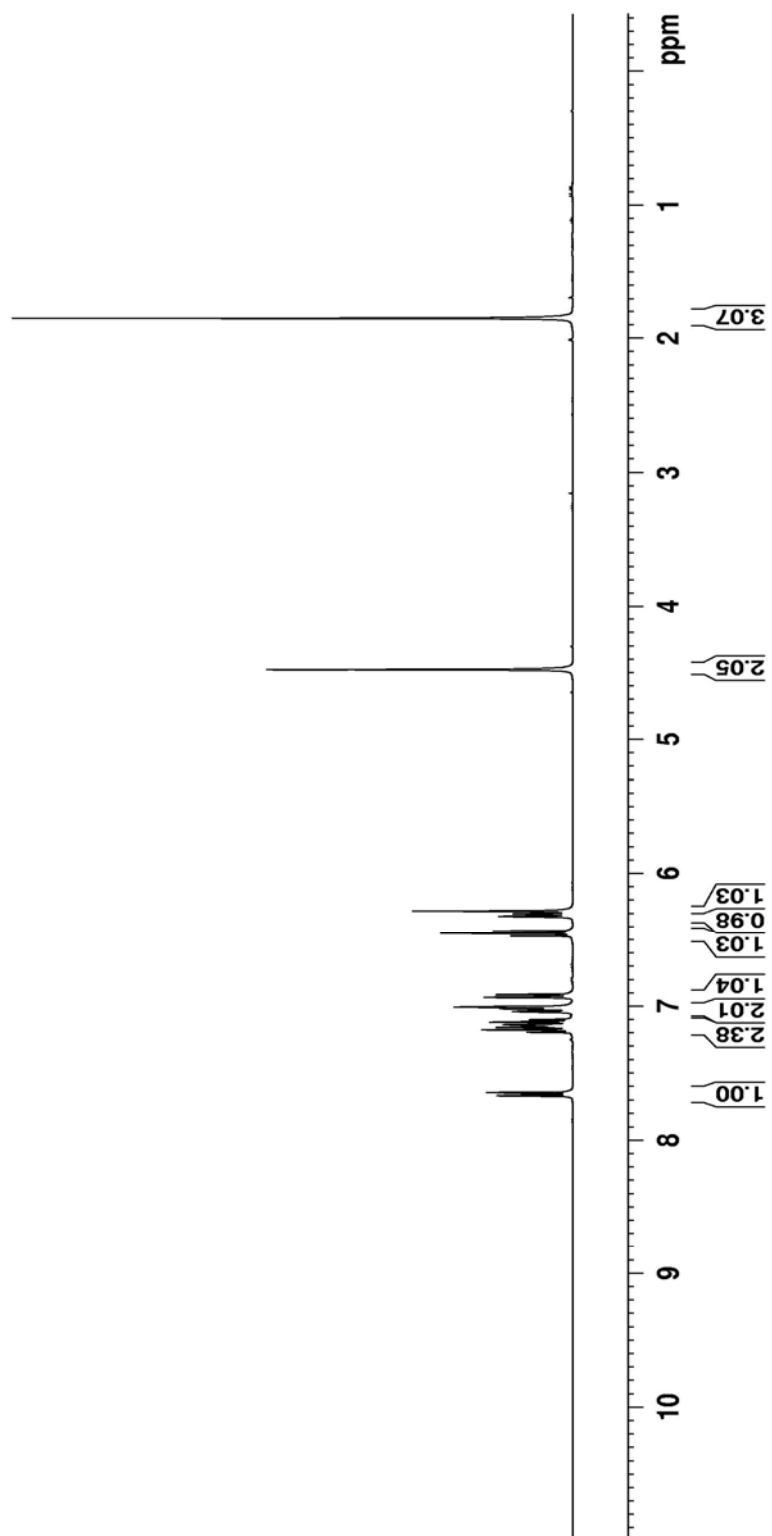

<sup>13</sup>C NMR spectrum of C (100 MHz, C<sub>6</sub>D<sub>6</sub>)

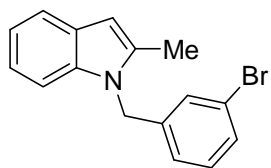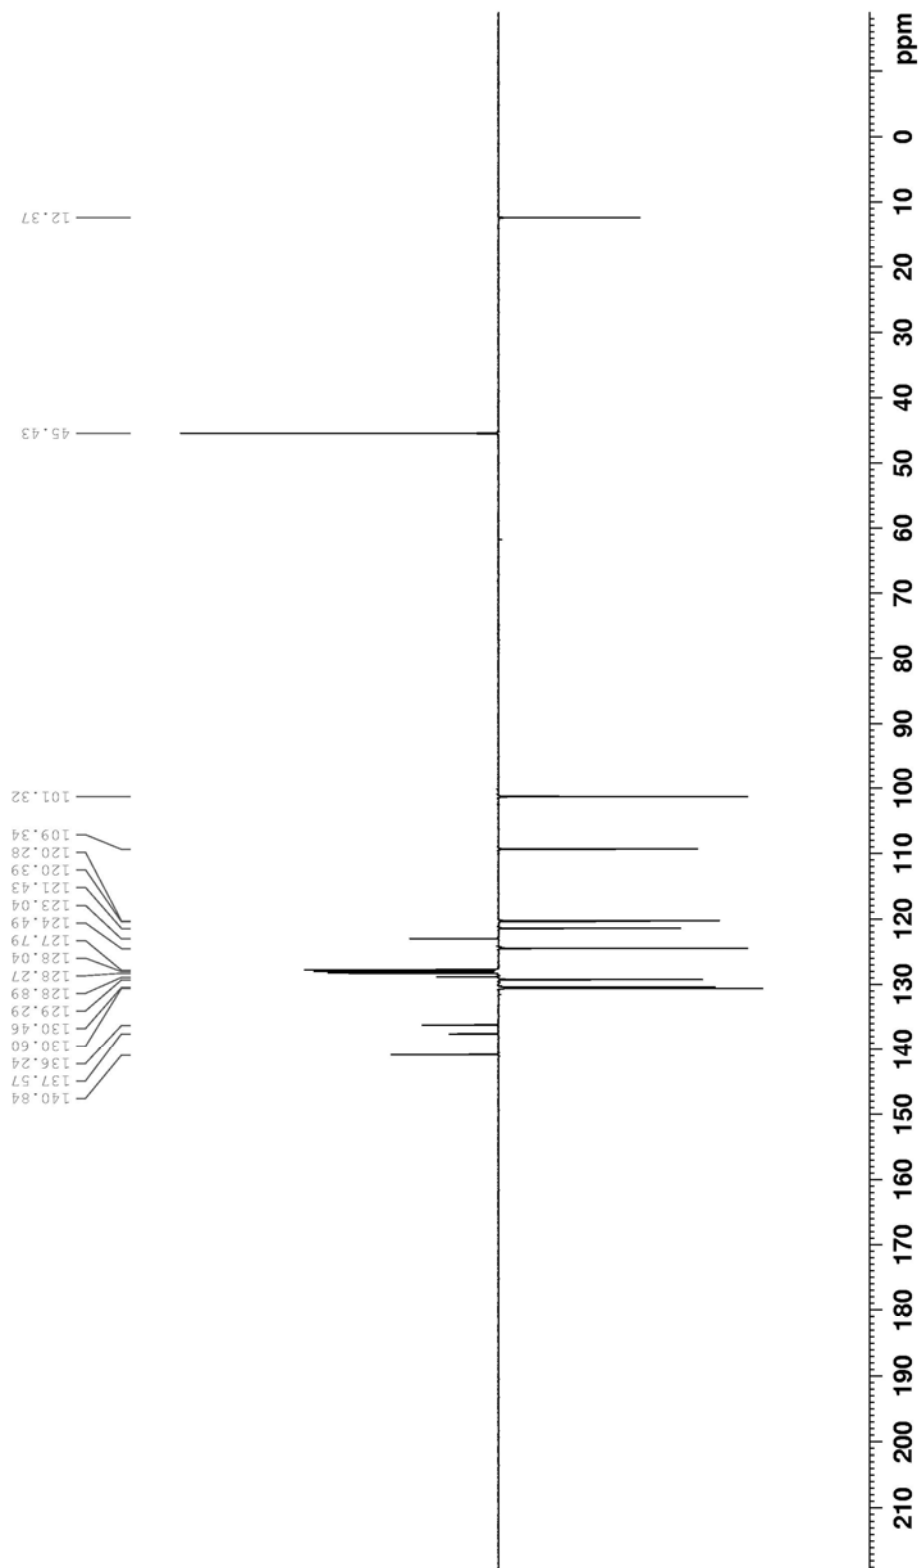

**<sup>1</sup>H NMR of D (400 MHz, C<sub>6</sub>D<sub>6</sub>)**

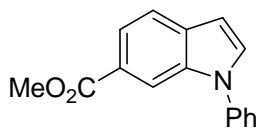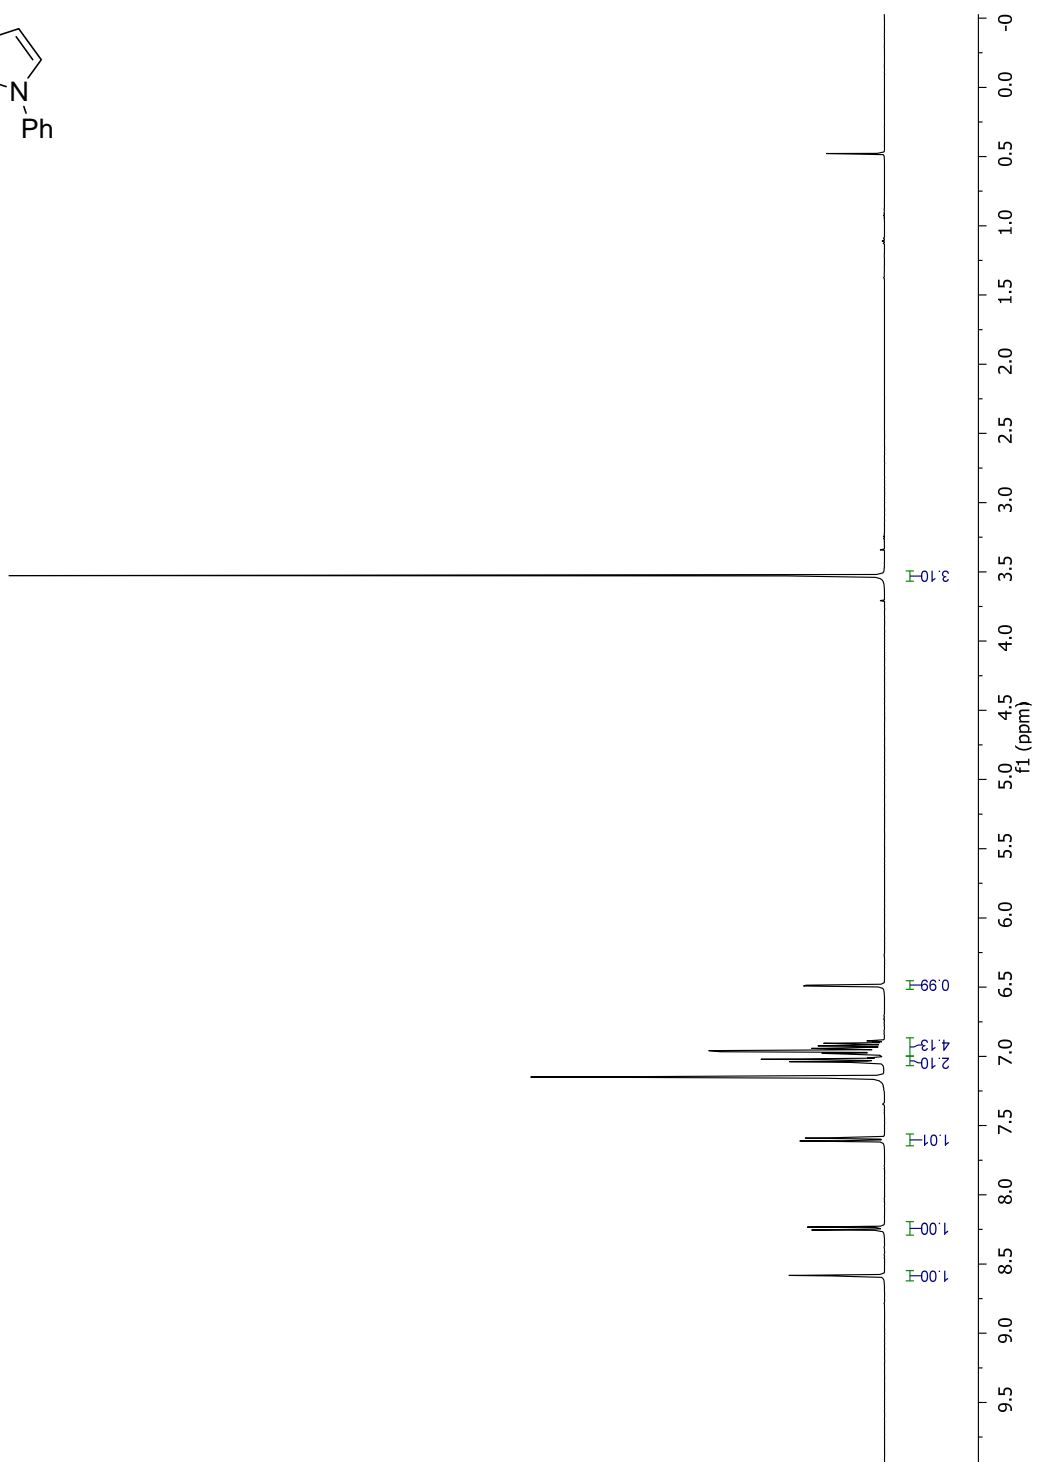

**$^{13}\text{C}$  NMR of D (400 MHz,  $\text{C}_6\text{D}_6$ )**

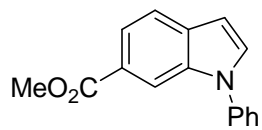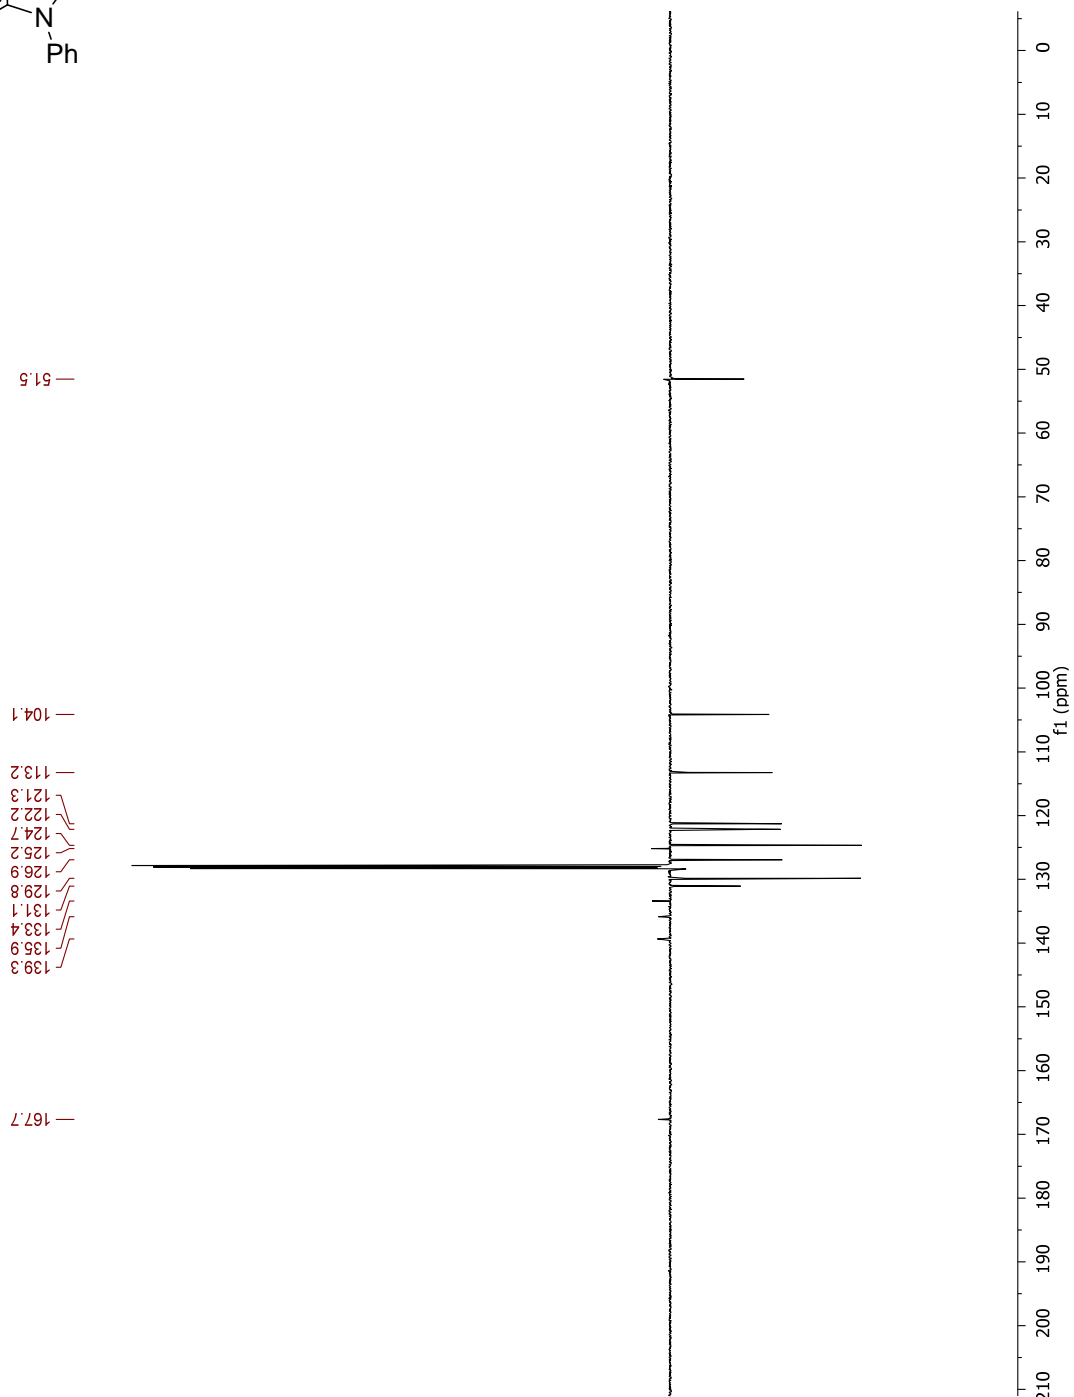

<sup>1</sup>H NMR of E (400 MHz, CDCl<sub>3</sub>)

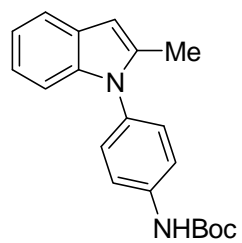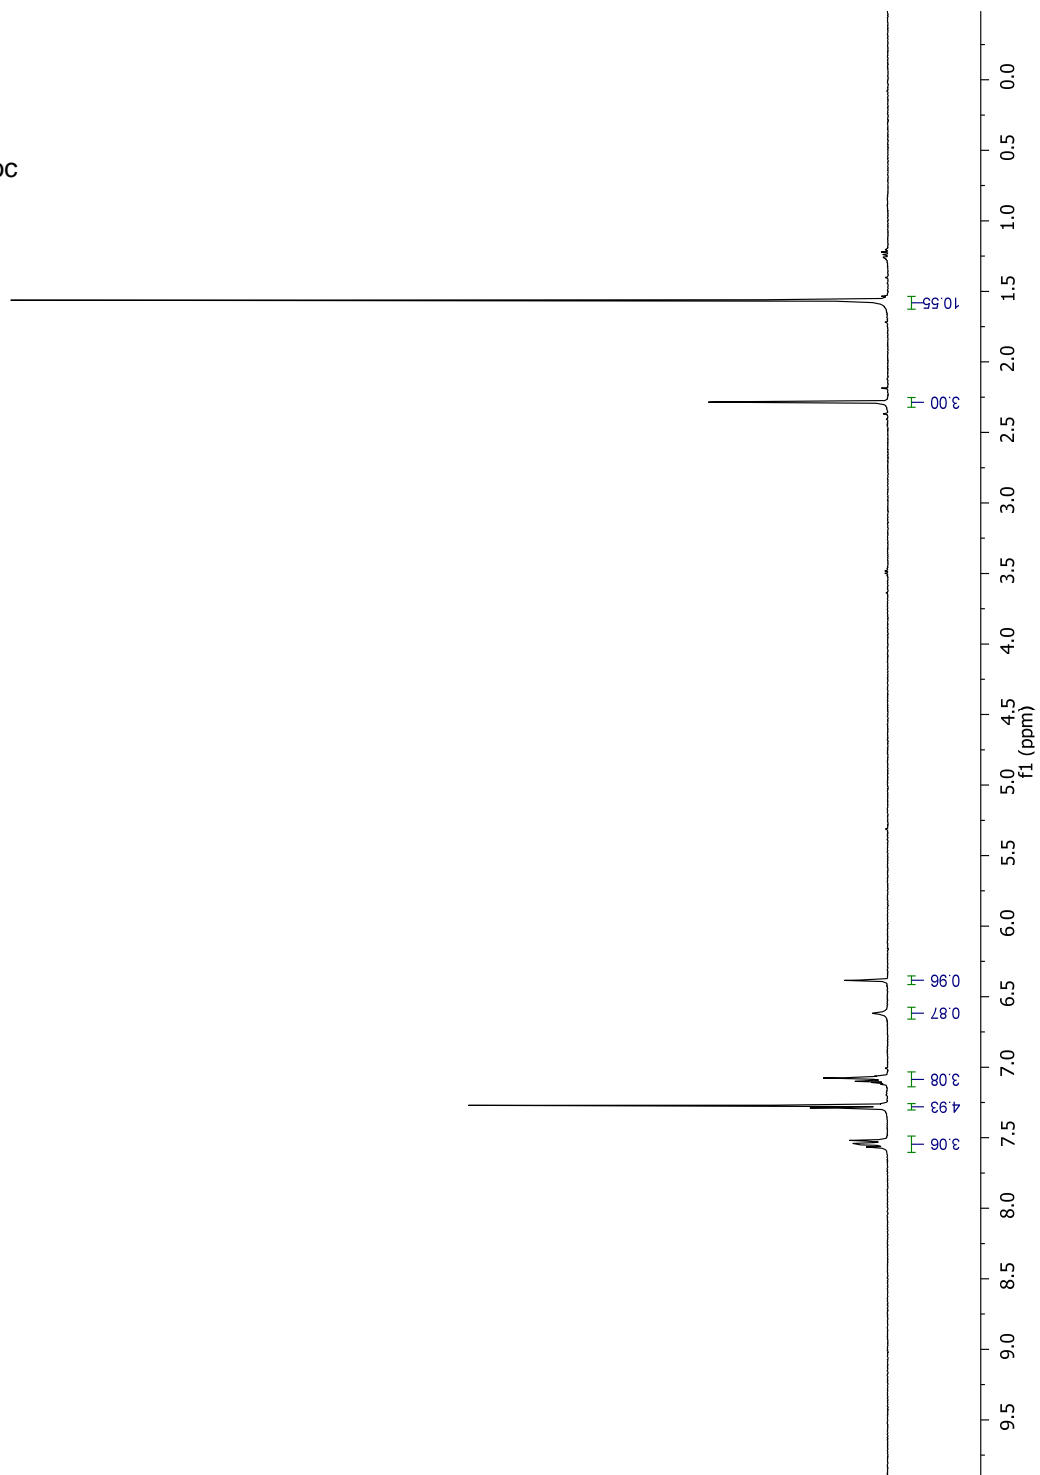



<sup>13</sup>C NMR of E (400 MHz, CDCl<sub>3</sub>)

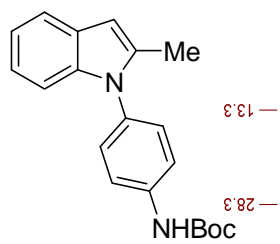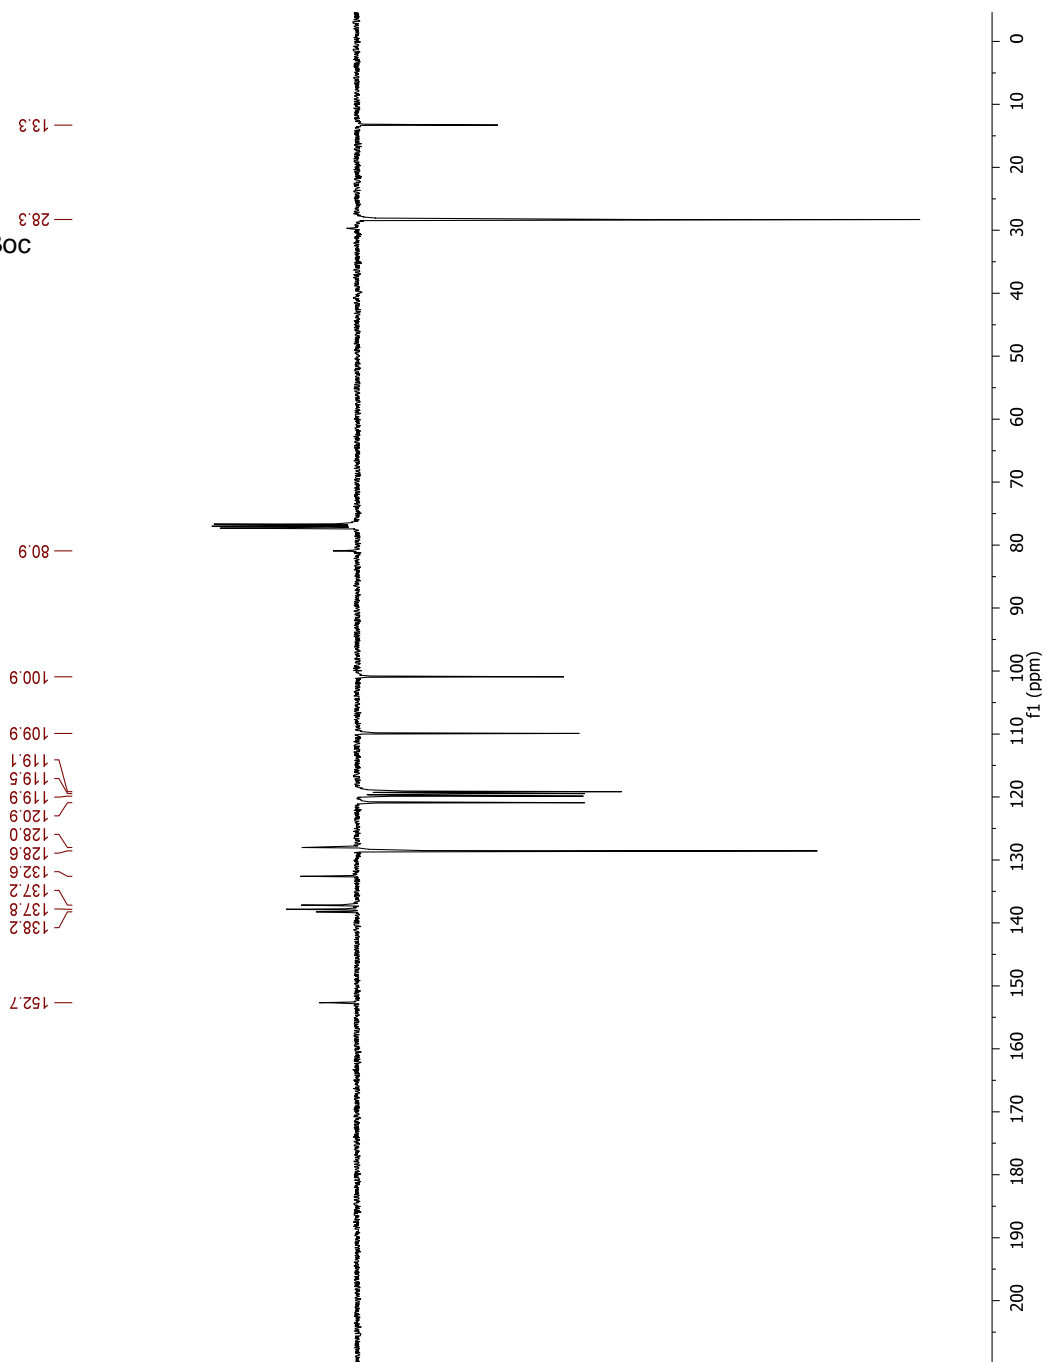

<sup>1</sup>H NMR of F (400 MHz, CDCl<sub>3</sub>)

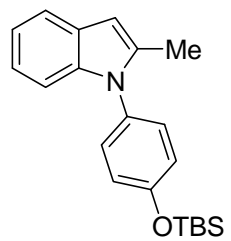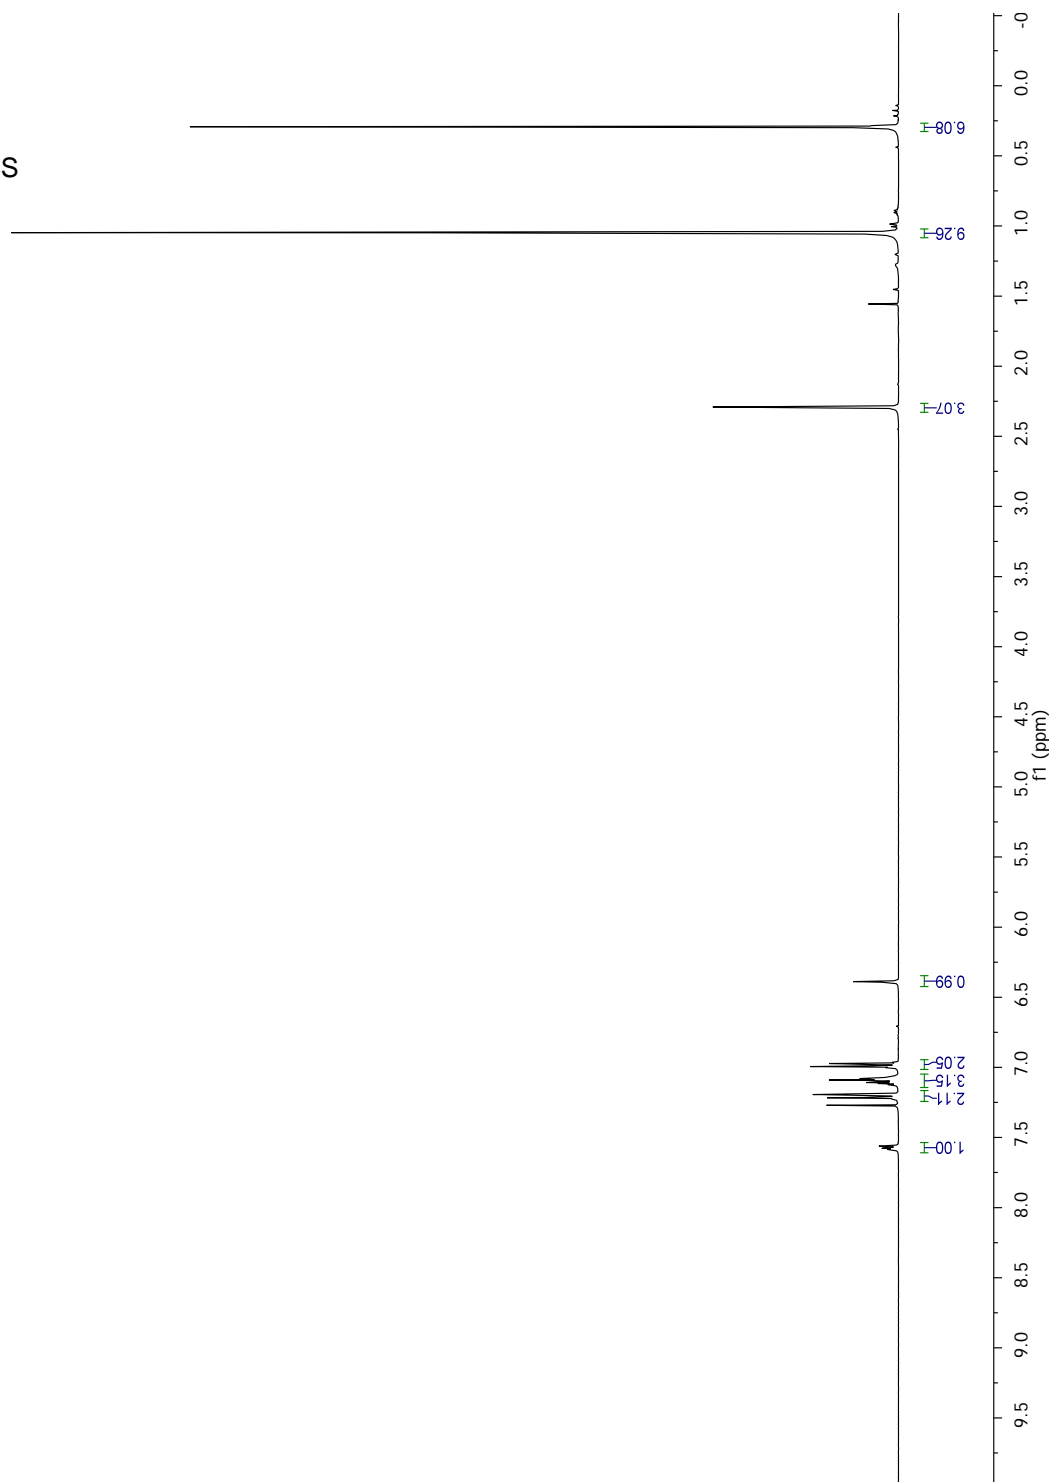

<sup>13</sup>C NMR of F (400 MHz, CDCl<sub>3</sub>)

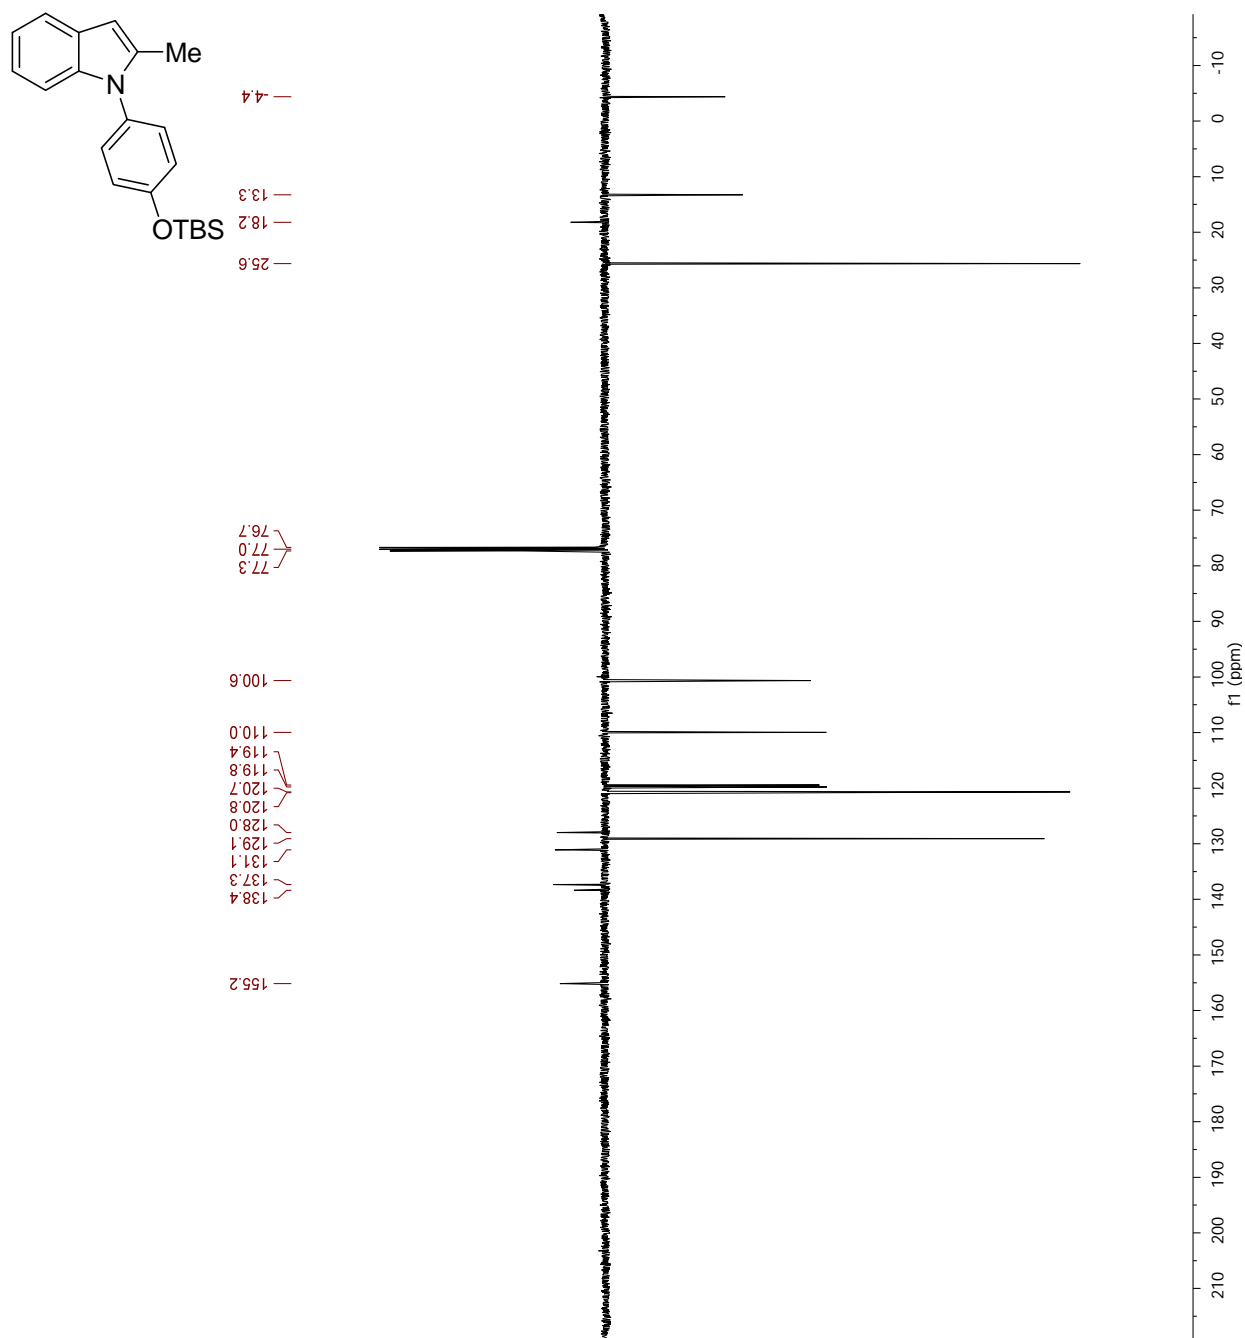

<sup>1</sup>H NMR of 1 (400 MHz, C<sub>6</sub>D<sub>6</sub>)

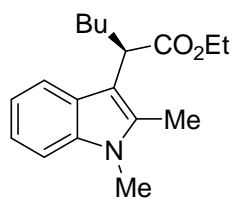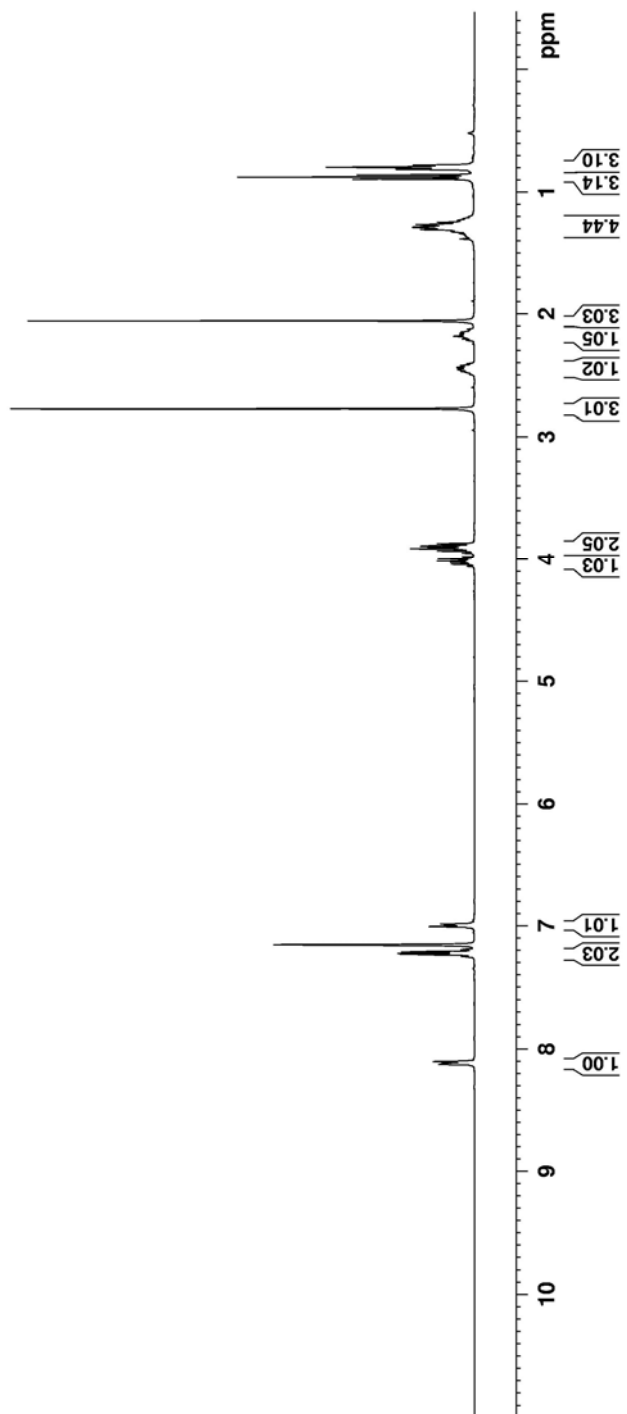

<sup>13</sup>C NMR spectrum of 1 (100 MHz, C<sub>6</sub>D<sub>6</sub>)

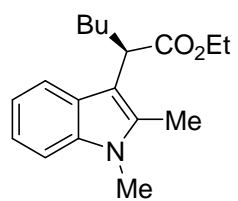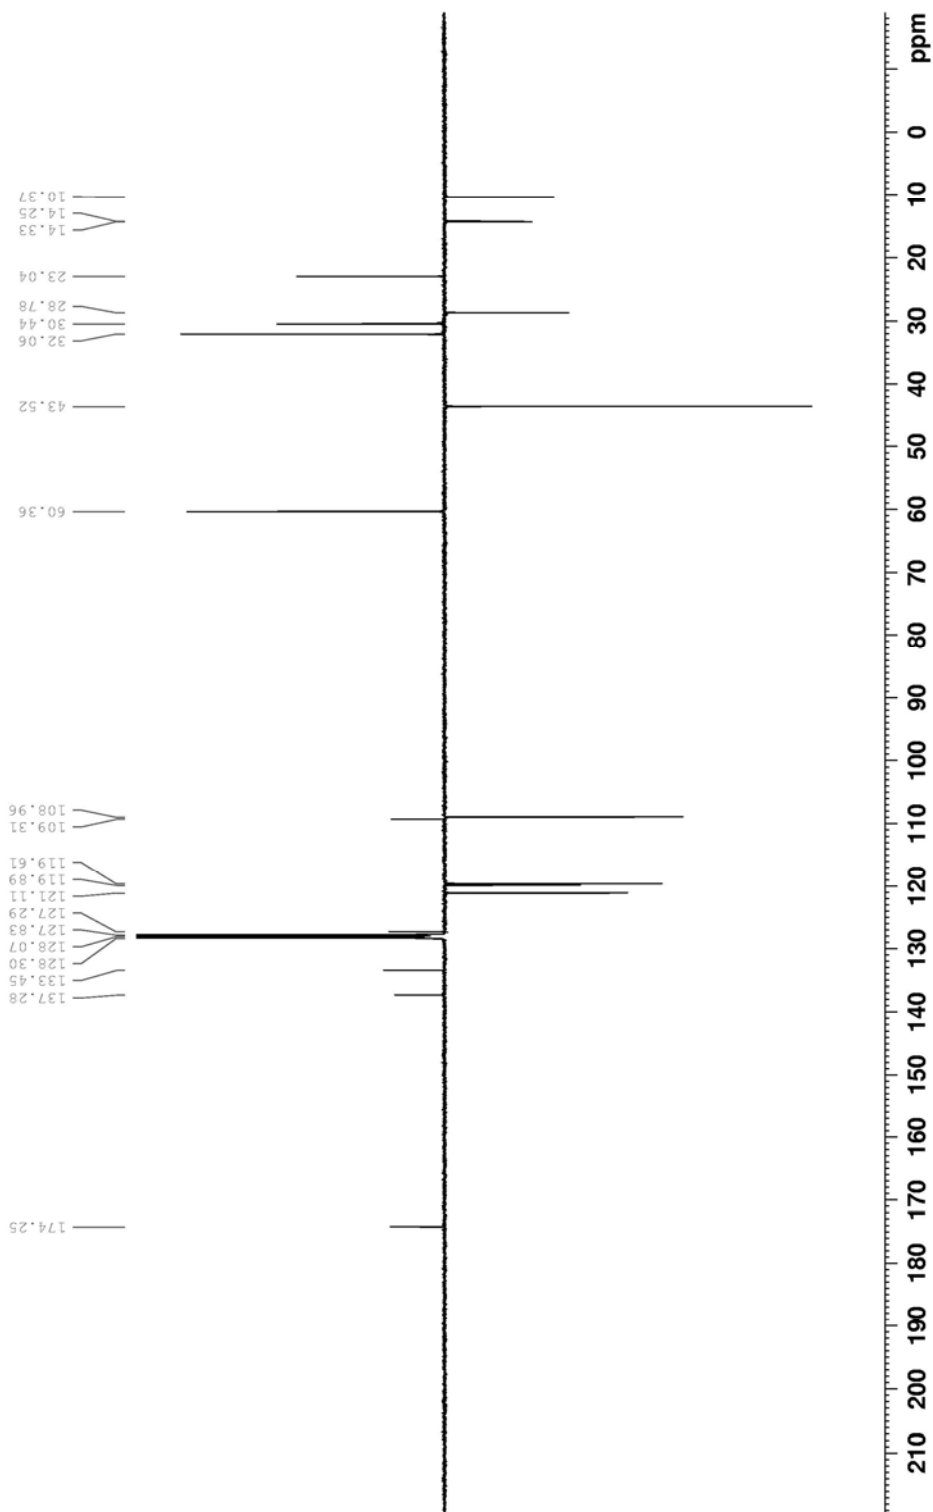

HPLC resolution of racemic **1** (Chiracel OD column, 99:1 hexanes:isopropanol – 97.5:2.5 hexanes isopropanol over 30 min, 1 mL/min, 220 nm)

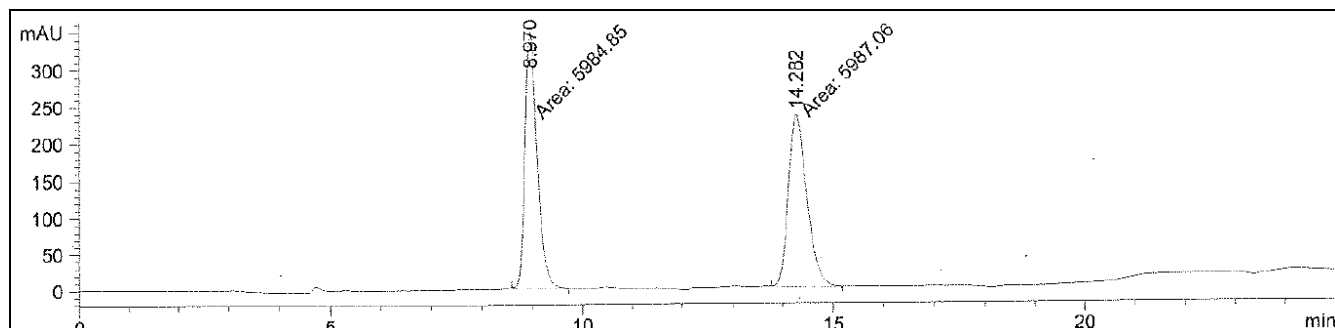

Enantiomeric excess of **1** (Chiracel OD column, 99:1 hexanes:isopropanol – 97.5:2.5 hexanes isopropanol over 30 min, 1 mL/min, 220 nm)

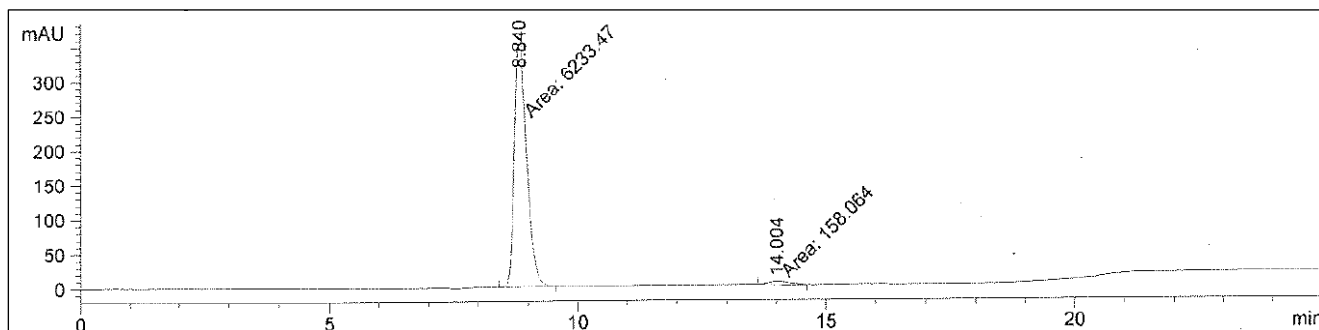

Signal 2: DAD1 B, Sig=220,4 Ref=450,80

| Peak #   | RetTime [min] | Type | Width [min] | Area [mAU*s] | Height [mAU] | Area %  |
|----------|---------------|------|-------------|--------------|--------------|---------|
| 1        | 8.840         | MM   | 0.2825      | 6233.46729   | 367.79446    | 97.5270 |
| 2        | 14.004        | MM   | 0.5361      | 158.06422    | 4.91373      | 2.4730  |
| Totals : |               |      |             | 6391.53151   | 372.70820    |         |

<sup>1</sup>H NMR of 2 (400 MHz, C<sub>6</sub>D<sub>6</sub>)

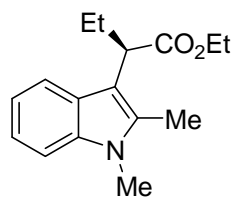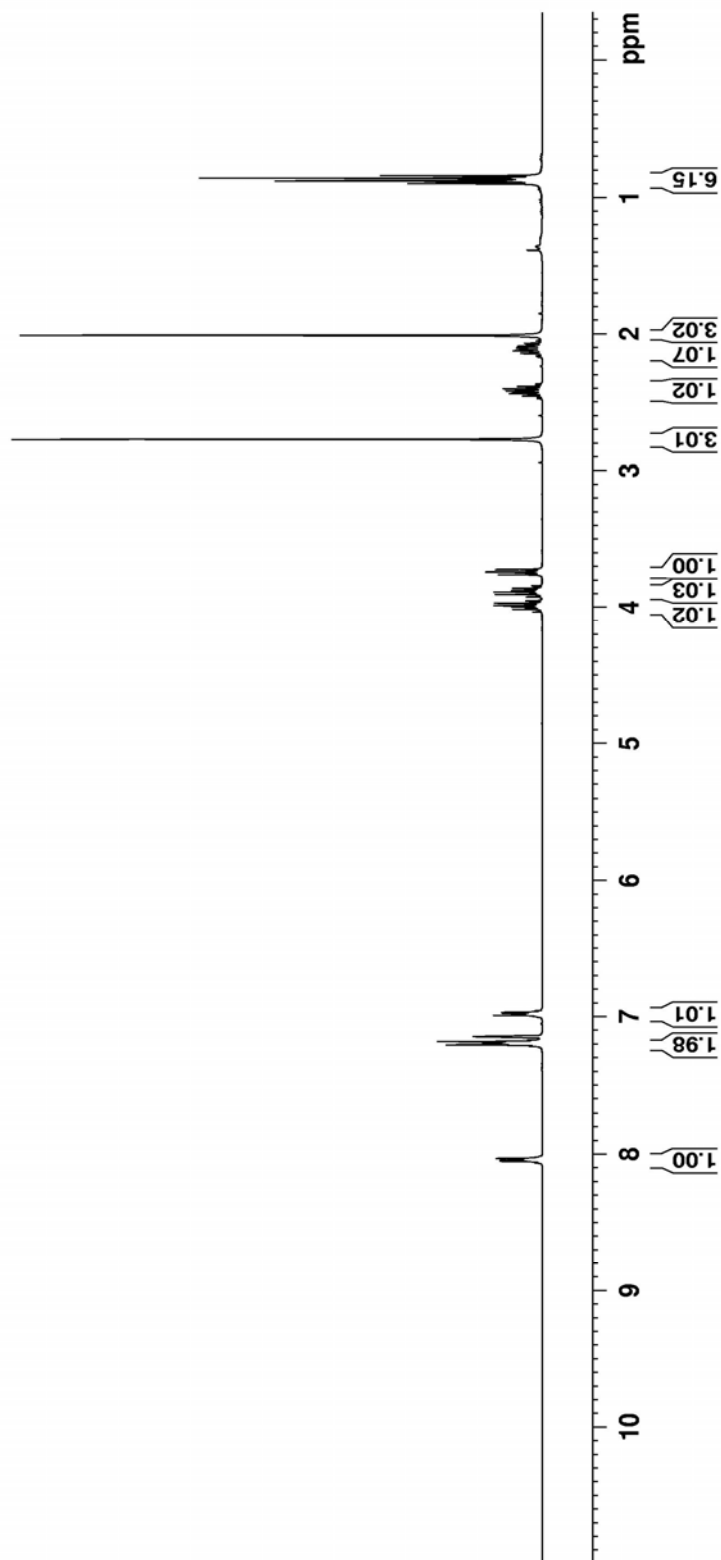

<sup>13</sup>C NMR spectrum of 2 (100 MHz, C<sub>6</sub>D<sub>6</sub>)

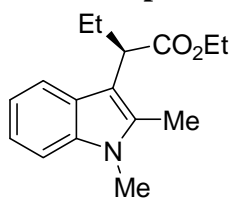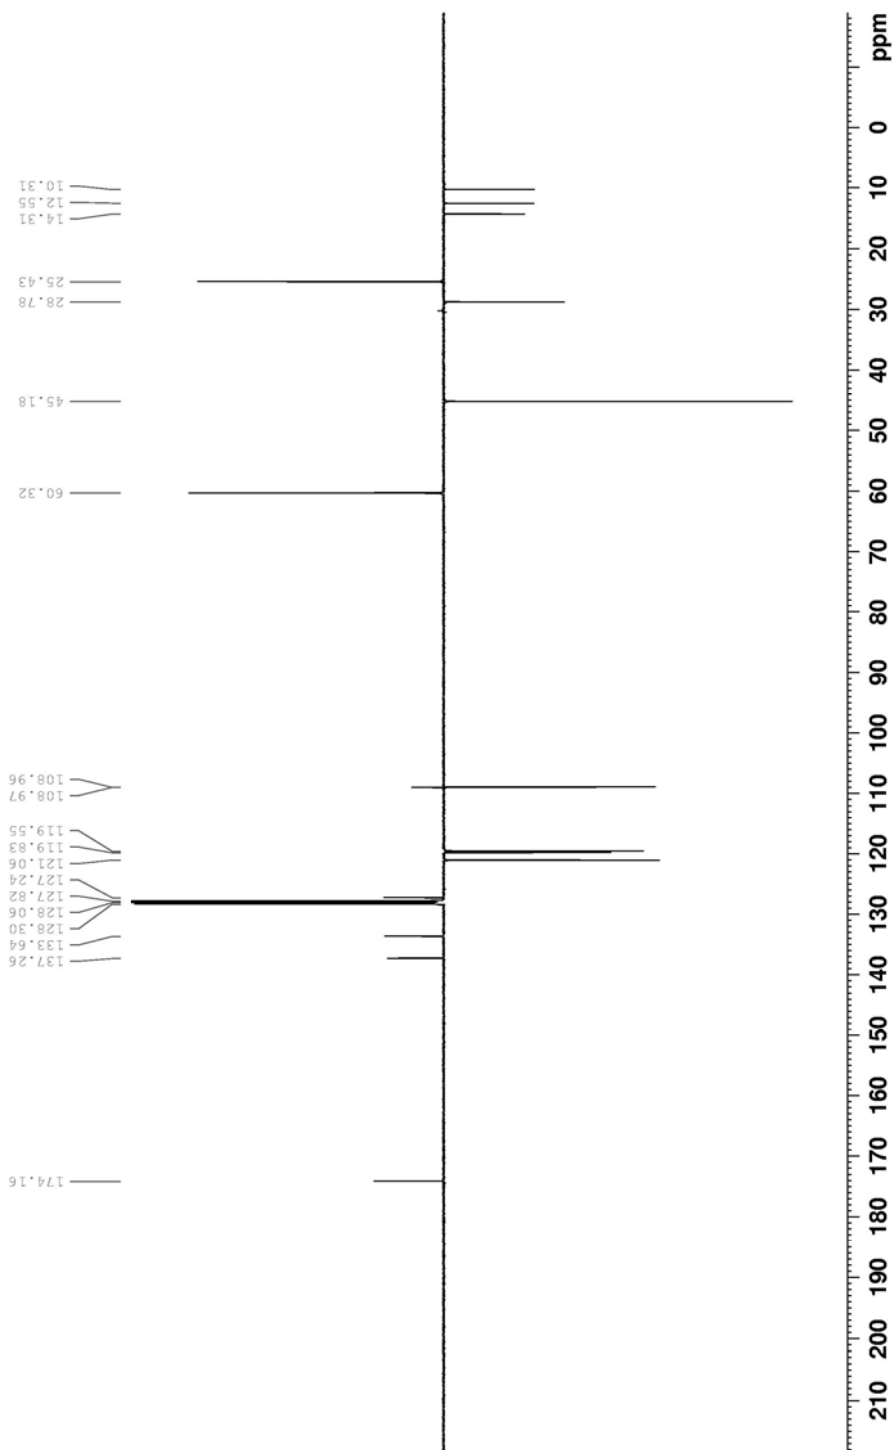



HPLC resolution of racemic **2** (Chiracel OD column, 99:1 hexanes:isopropanol – 97.5:2.5 hexanes isopropanol over 30 min, 1 mL/min, 220 nm)

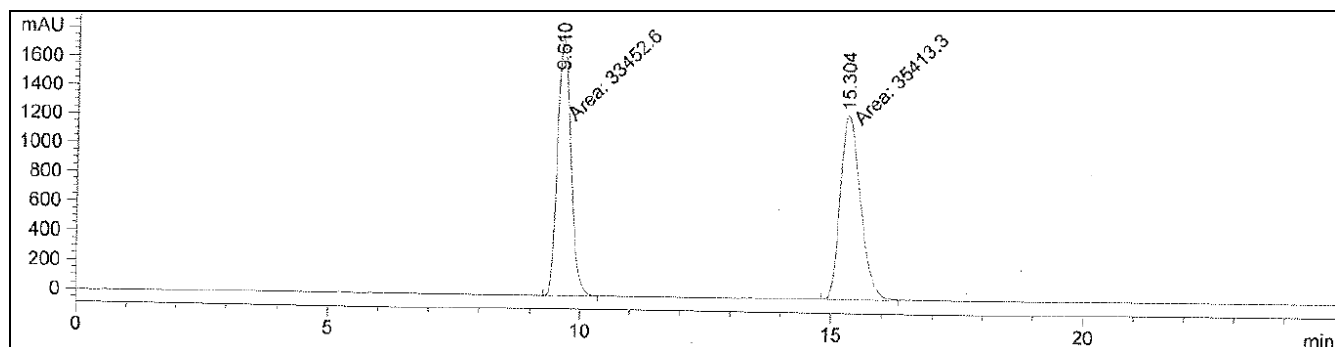

Enantiomeric excess of **2** (Chiracel OD column, 99:1 hexanes:isopropanol – 97.5:2.5 hexanes isopropanol over 30 min, 1 mL/min, 220 nm)

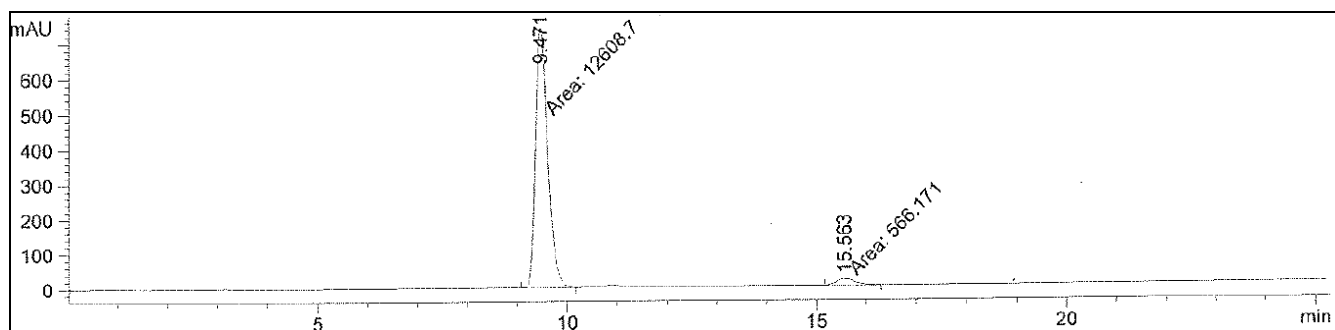

Signal 2: DAD1 B, Sig=220,4 Ref=450,80

| Peak #   | RetTime [min] | Type | Width [min] | Area [mAU*s] | Height [mAU] | Area %  |
|----------|---------------|------|-------------|--------------|--------------|---------|
| 1        | 9.471         | MM   | 0.2835      | 1.26087e4    | 741.28253    | 95.7026 |
| 2        | 15.563        | MM   | 0.4738      | 566.17084    | 19.91690     | 4.2974  |
| Totals : |               |      |             | 1.31749e4    | 761.19943    |         |

<sup>1</sup>H NMR Spectrum of **3** (400 MHz, C<sub>6</sub>D<sub>6</sub>)

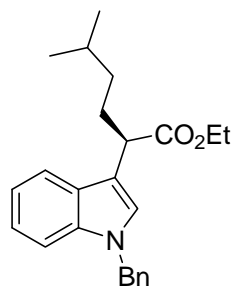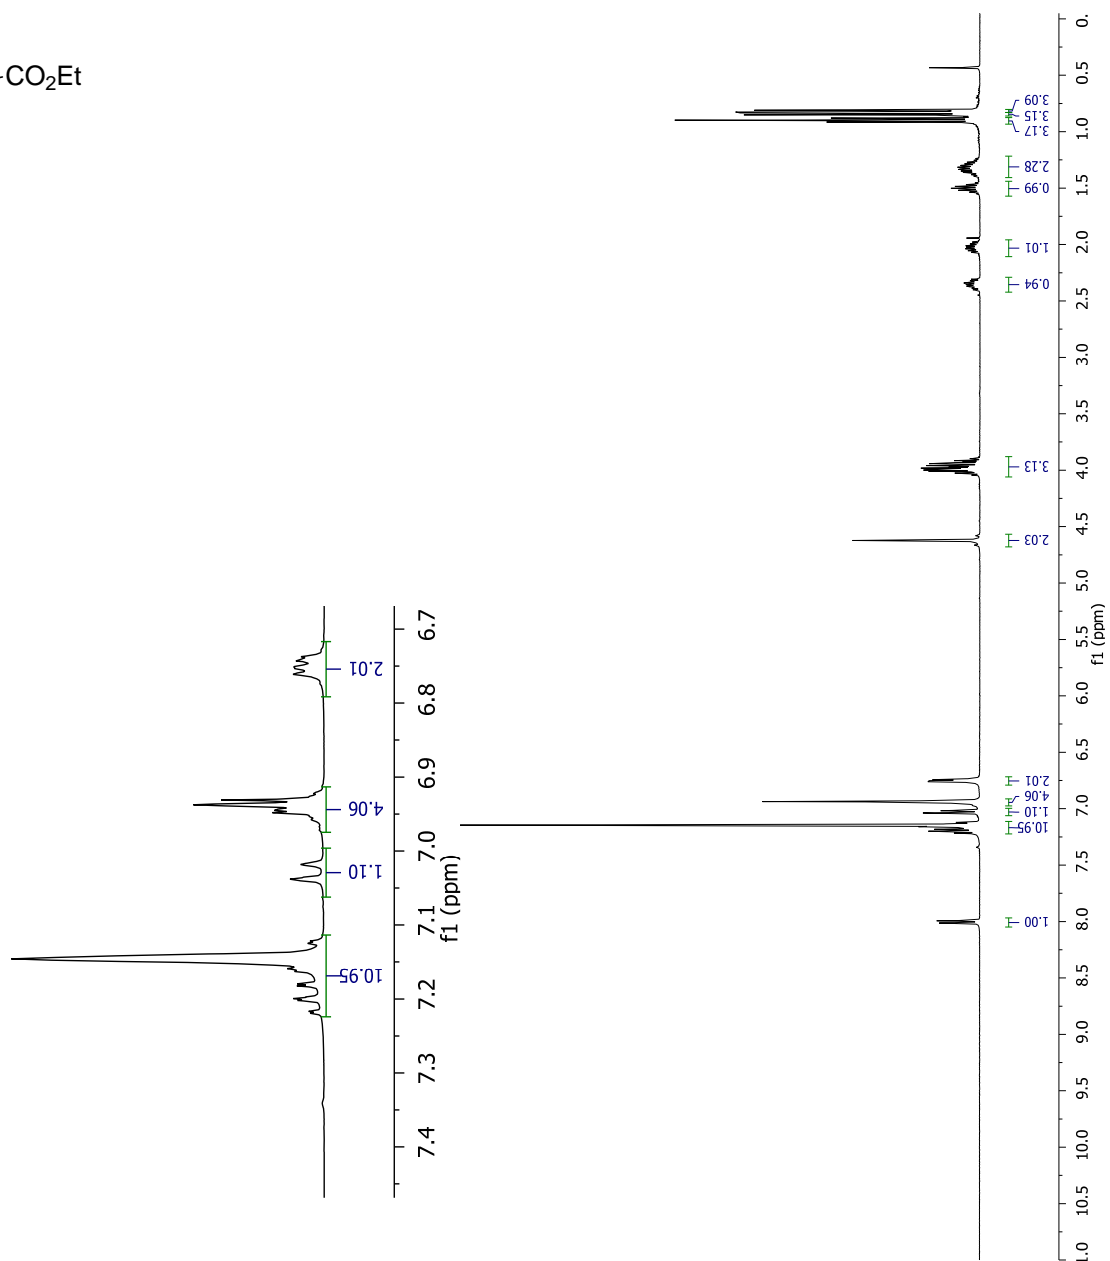

<sup>13</sup>C NMR Spectrum of **3** (100 MHz, C<sub>6</sub>D<sub>6</sub>)

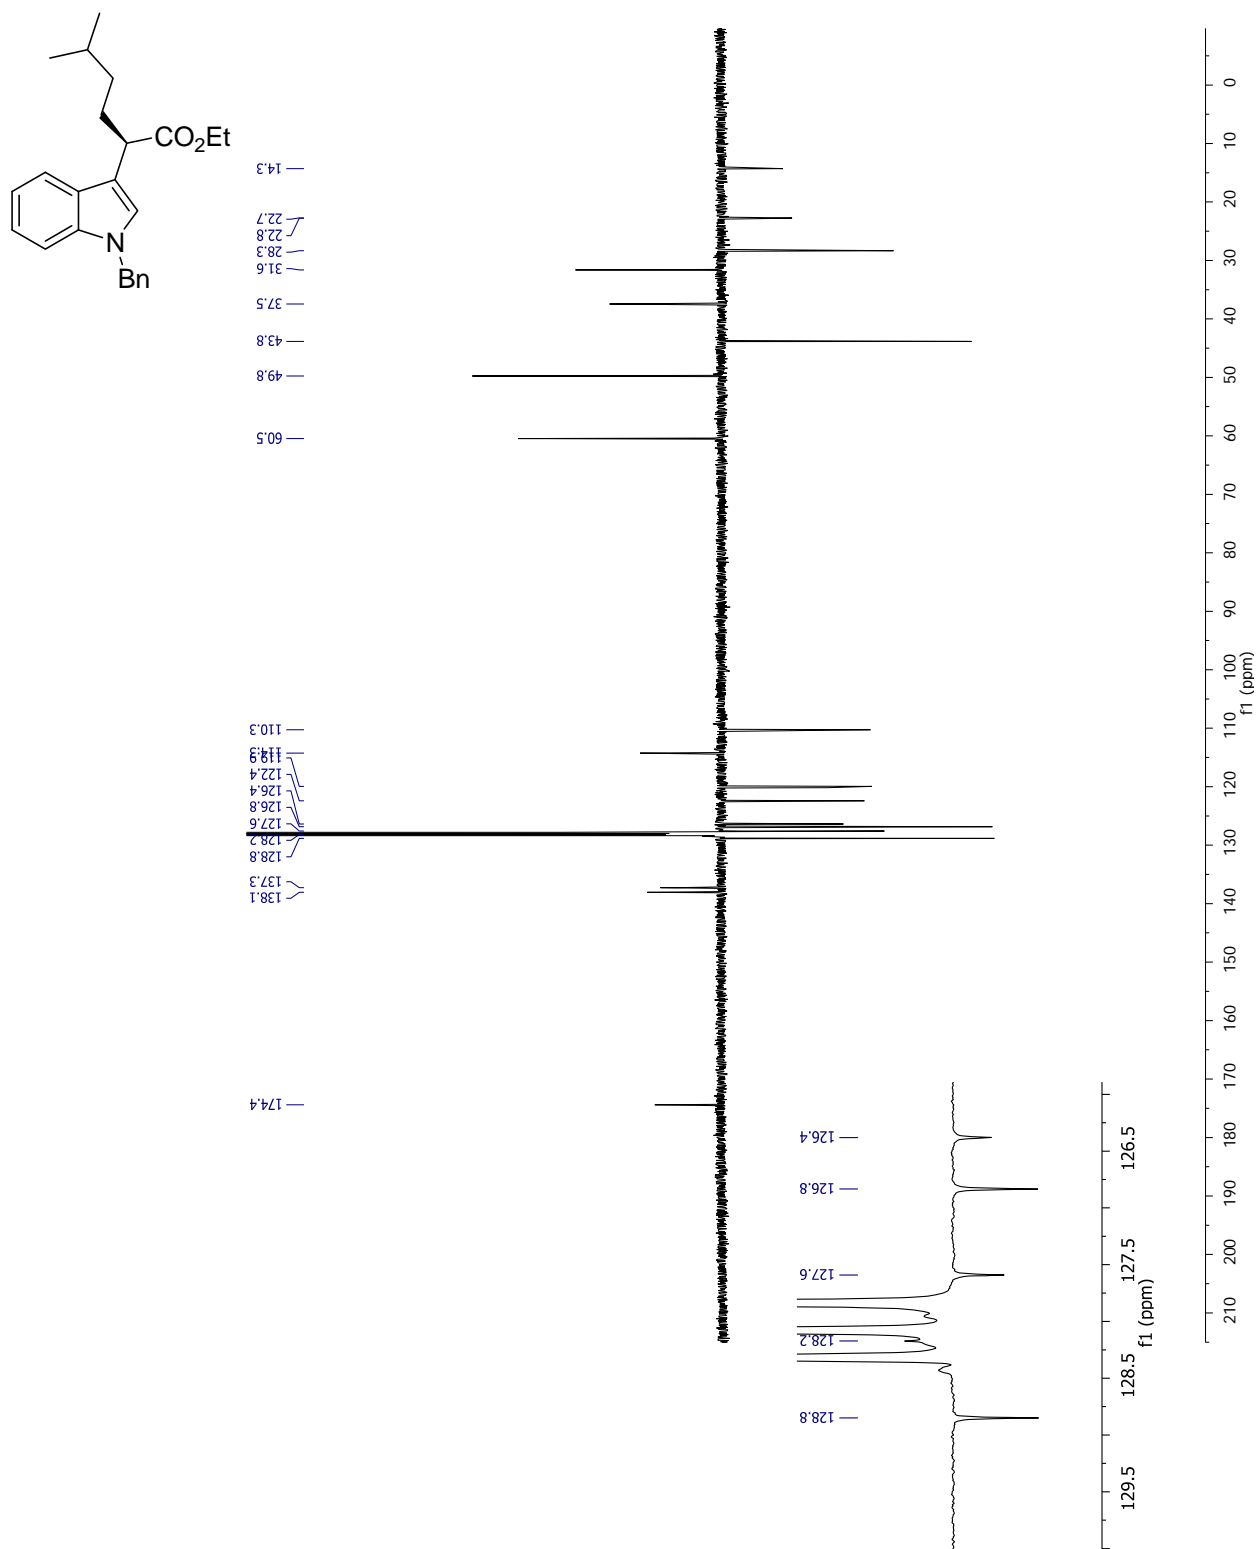

HPLC resolution of racemic **3** (Chiracel OD column, 99:1 hexanes:isopropanol – 97.5:2.5 hexanes isopropanol over 30 min, 1 mL/min, 220 nm)

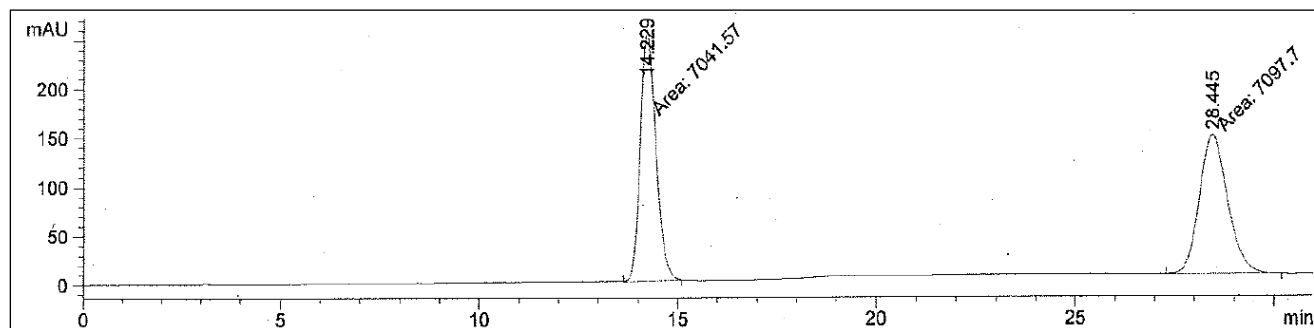

Enantiomeric excess of **3** (Chiracel OD column, 99:1 hexanes:isopropanol – 97.5:2.5 hexanes isopropanol over 30 min, 1 mL/min, 220 nm)

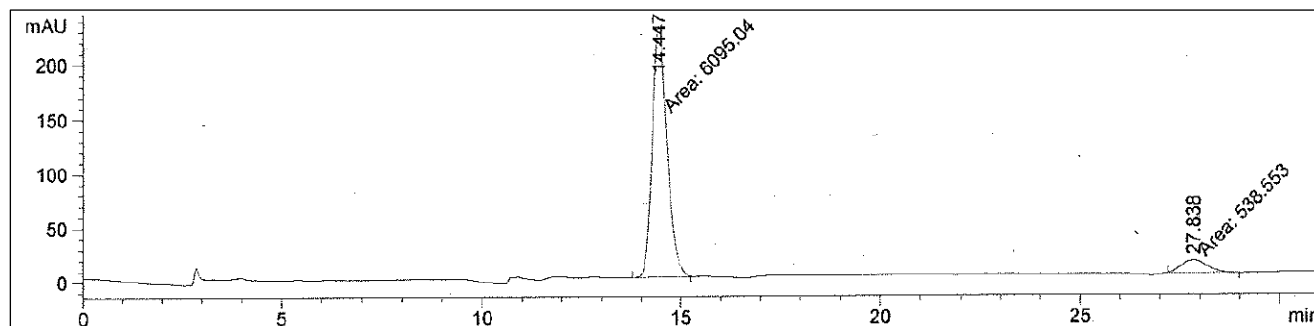

| Peak #   | RetTime [min] | Type | Width [min] | Area [mAU*s] | Height [mAU] | Area %  |
|----------|---------------|------|-------------|--------------|--------------|---------|
| 1        | 14.447        | MM   | 0.4411      | 6095.04443   | 230.31833    | 91.8814 |
| 2        | 27.838        | MM   | 0.7484      | 538.55341    | 11.99318     | 8.1186  |
| Totals : |               |      |             | 6633.59784   | 242.31151    |         |

**<sup>1</sup>H NMR of 4 (400 MHz, C<sub>6</sub>D<sub>6</sub>)**

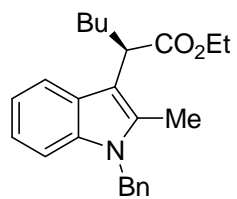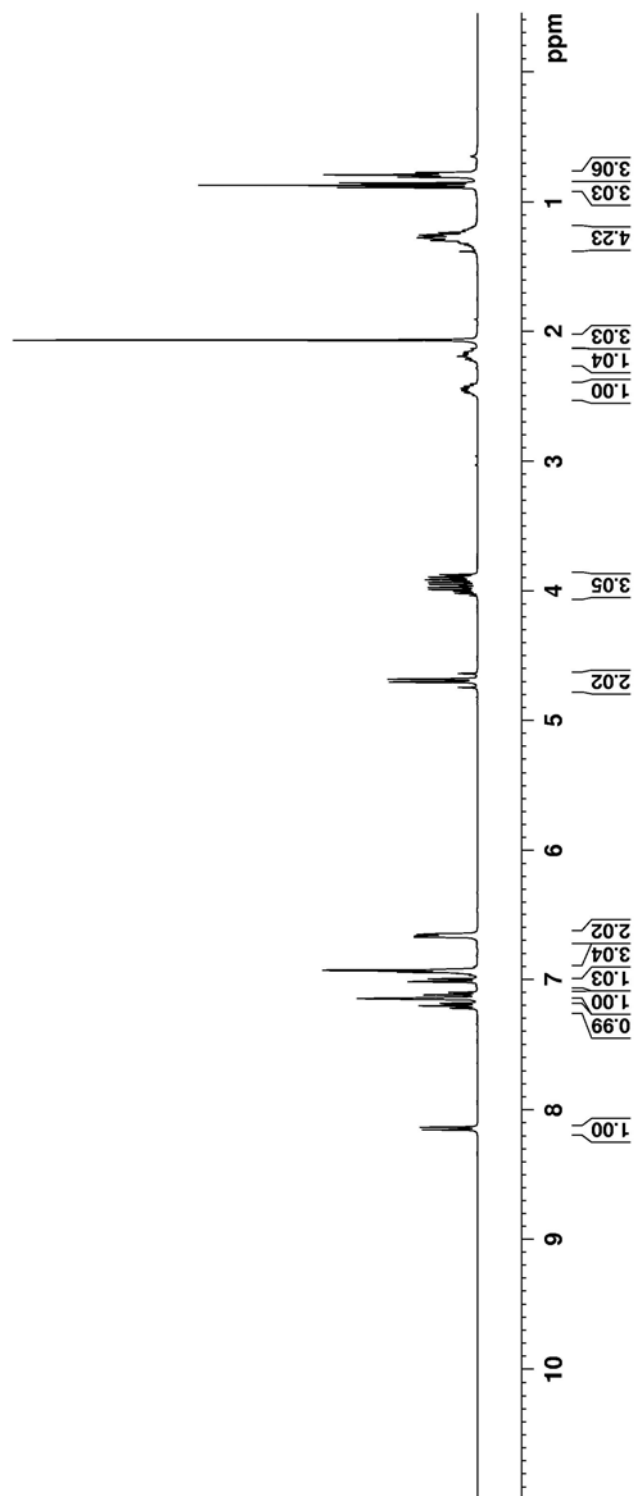

<sup>13</sup>C NMR spectrum of 4 (100 MHz, C<sub>6</sub>D<sub>6</sub>)

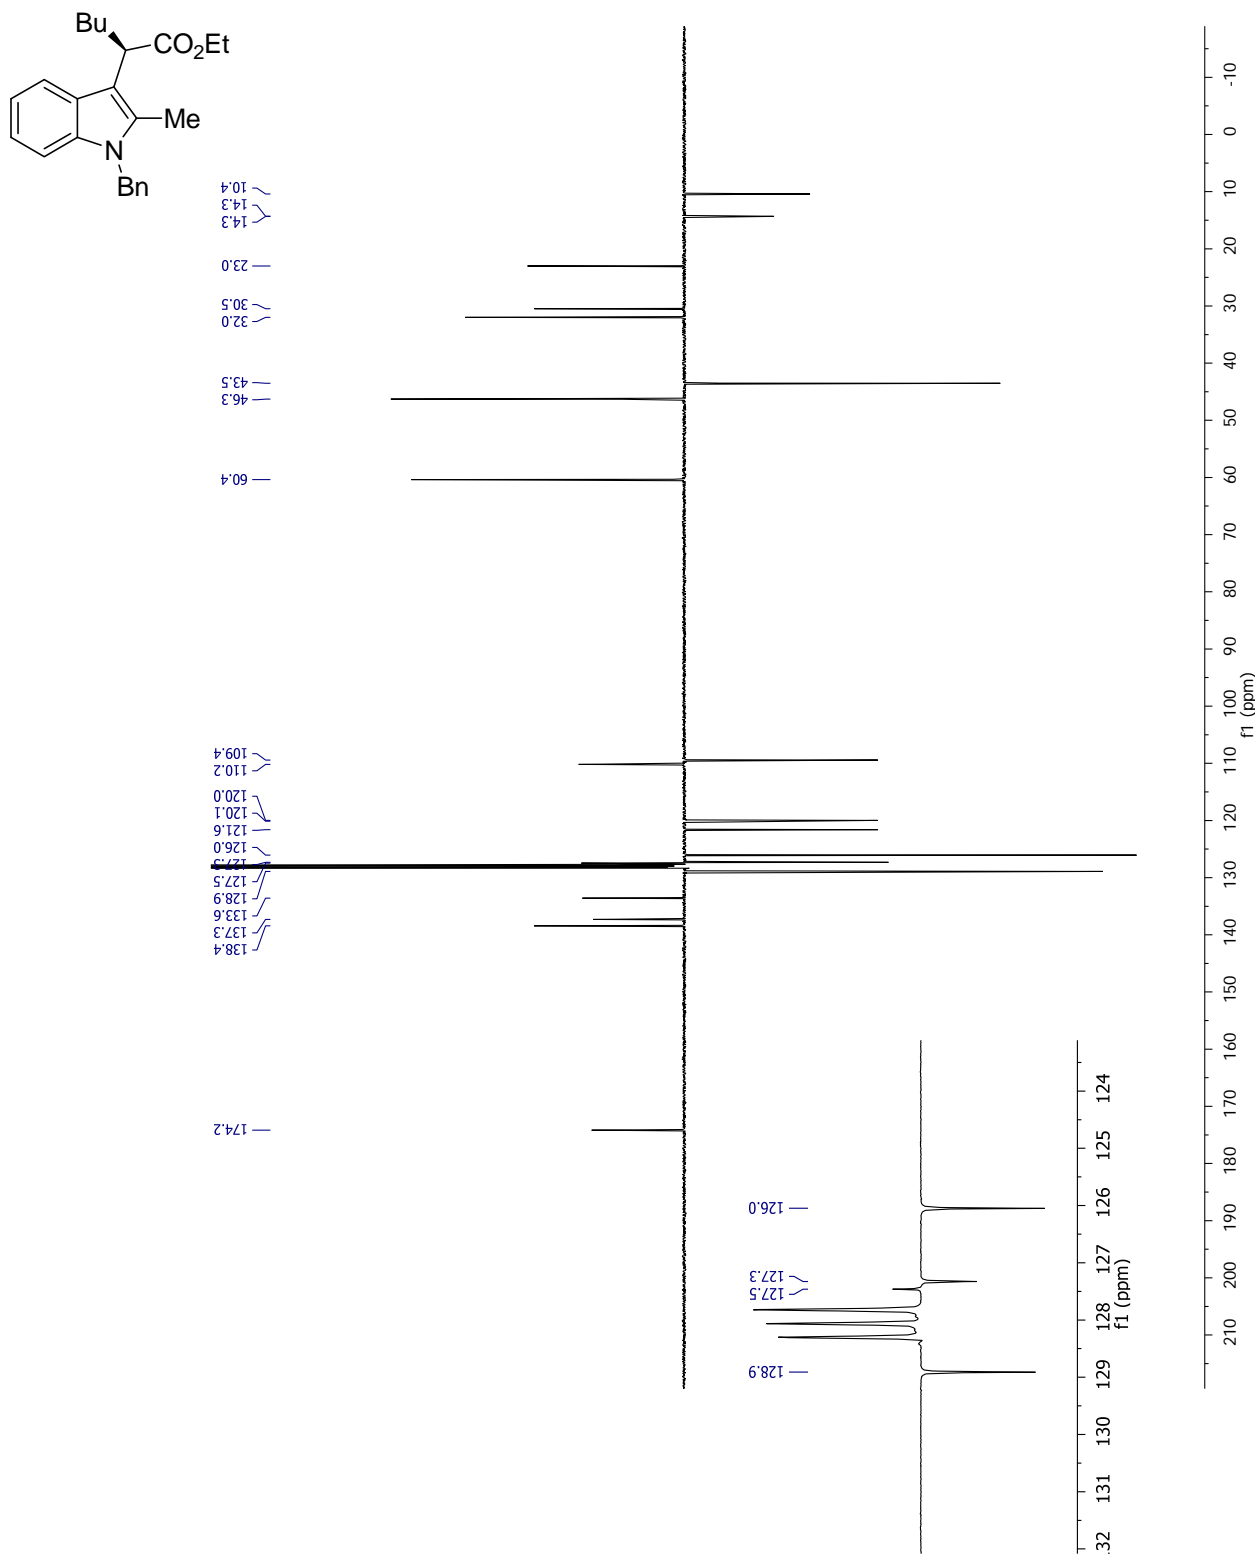

HPLC resolution of racemic **4** (Chiracel OD column, 99:1 hexanes:isopropanol – 97.5:2.5 hexanes isopropanol over 30 min, 1 mL/min, 220 nm)

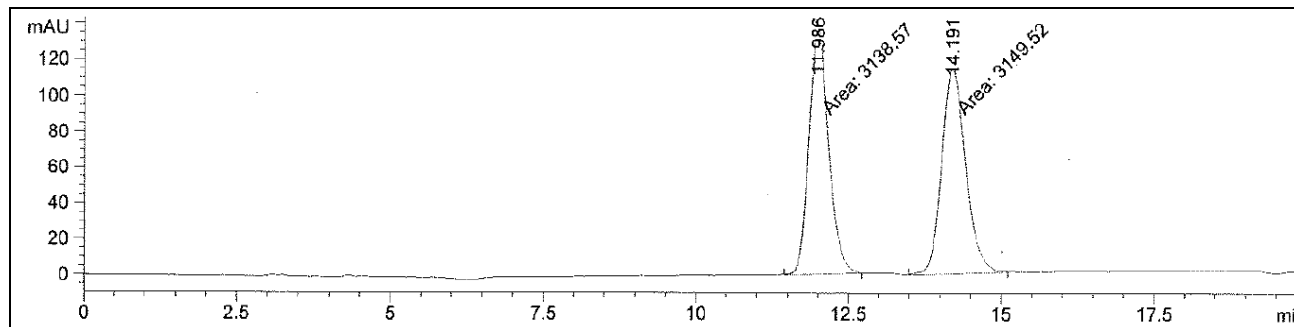

Enantiomeric excess of **4** (Chiracel OD column, 99:1 hexanes:isopropanol – 97.5:2.5 hexanes isopropanol over 30 min, 1 mL/min, 220 nm)

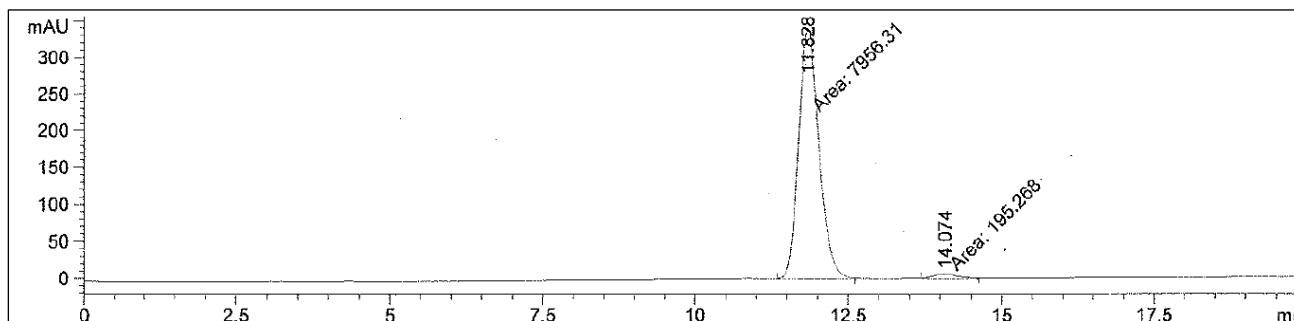

Signal 2: DAD1 B, Sig=220,4 Ref=450,80

| Peak #   | RetTime [min] | Type | Width [min] | Area [mAU*s] | Height [mAU] | Area %  |
|----------|---------------|------|-------------|--------------|--------------|---------|
| 1        | 11.828        | MM   | 0.3896      | 7956.31396   | 340.40134    | 97.6045 |
| 2        | 14.074        | MM   | 0.4958      | 195.26753    | 6.56409      | 2.3955  |
| Totals : |               |      |             | 8151.58150   | 346.96543    |         |

<sup>1</sup>H NMR of 5 (400 MHz, C<sub>6</sub>D<sub>6</sub>)

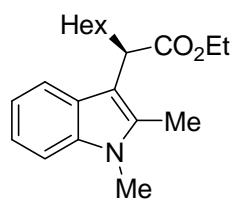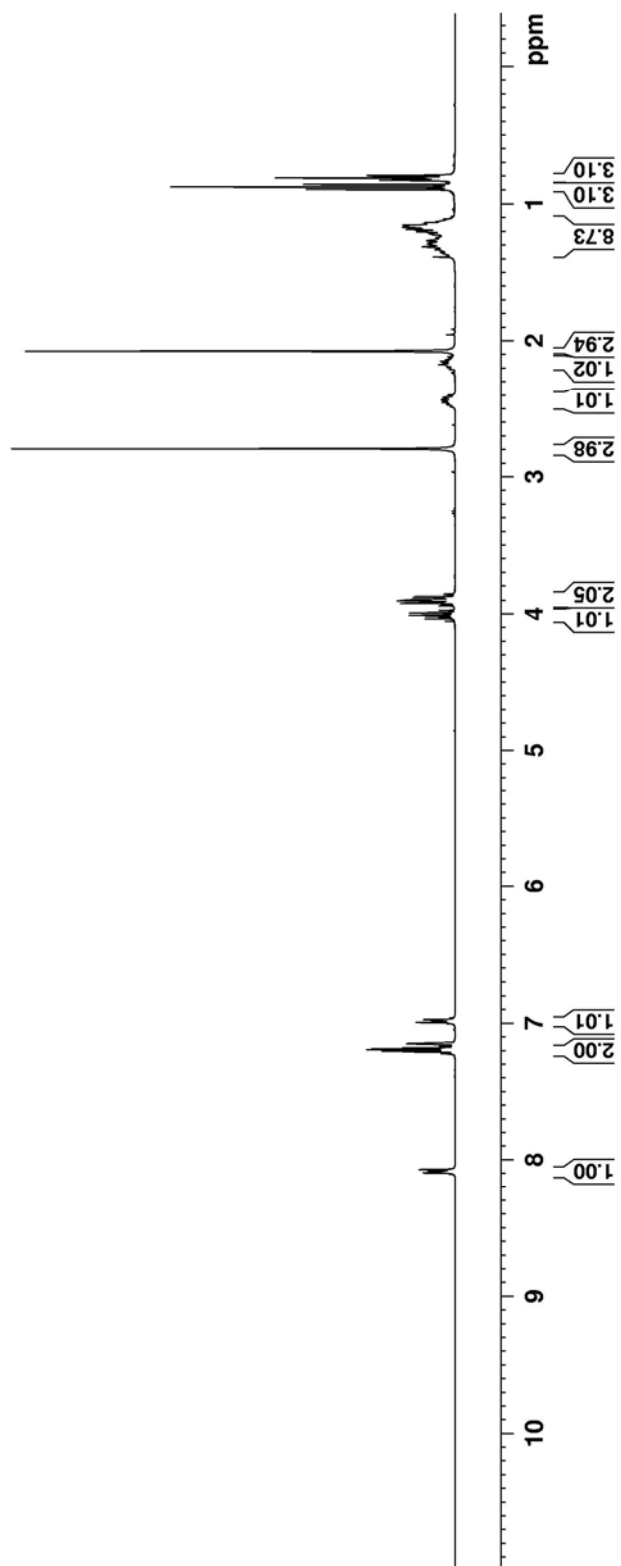



<sup>13</sup>C NMR spectrum of 5 (100 MHz, C<sub>6</sub>D<sub>6</sub>)

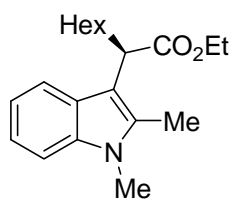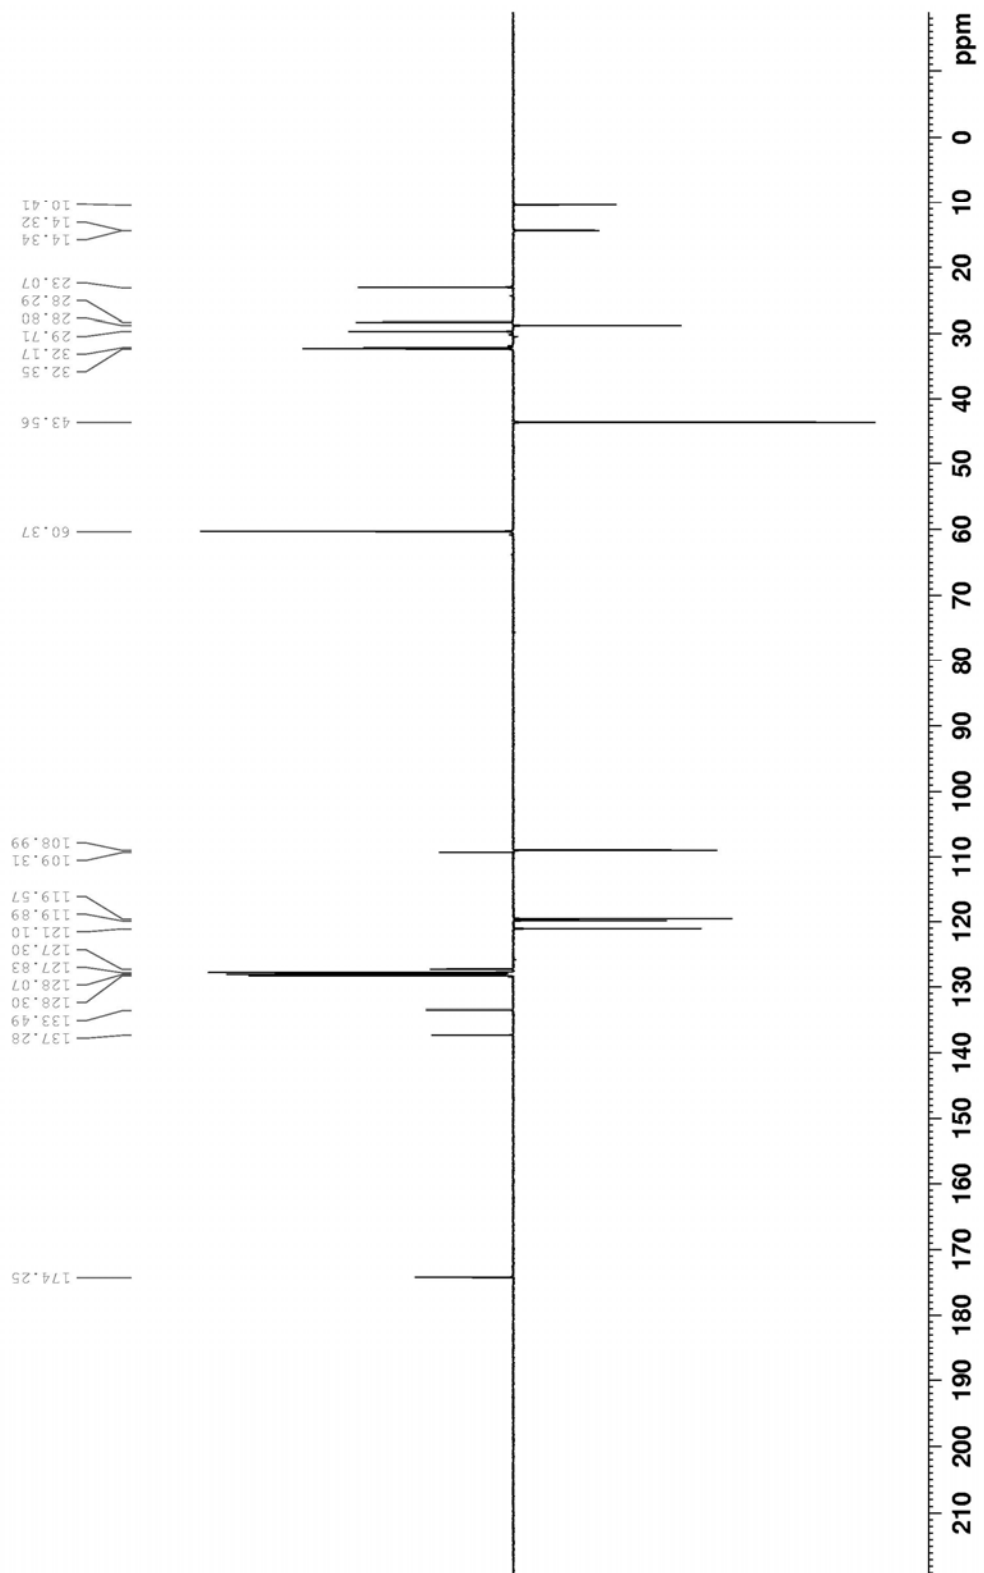

HPLC resolution of racemic **5** (Chiracel OD column, 99:1 hexanes:isopropanol – 97.5:2.5 hexanes isopropanol over 30 min, 1 mL/min, 220 nm)

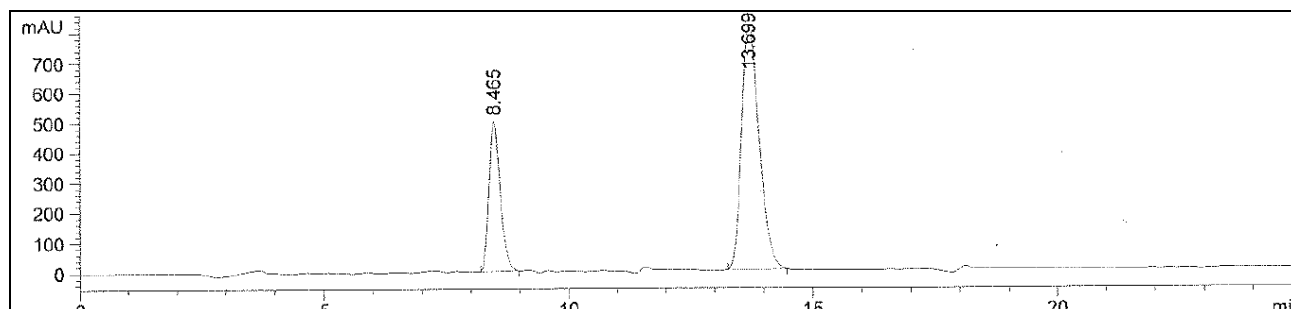

NOTE: “Racemic” material was prepared using a mechanical mixture of  $\text{Rh}_2(\text{S-PTTL})_4$  and  $\text{Rh}_2(\text{R-PTTL})_4$  which accounts for the inequivalent integration of the racemate.

Enantiomeric excess of **5** (Chiracel OD column, 99:1 hexanes:isopropanol – 97.5:2.5 hexanes isopropanol over 30 min, 1 mL/min, 220 nm)

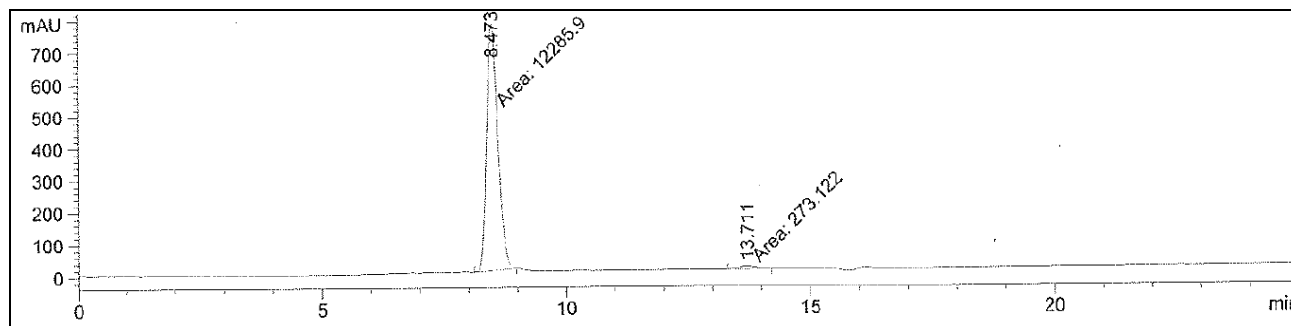

Signal 2: DAD1 B, Sig=220,4 Ref=450,80

| Peak #   | RetTime [min] | Type | Width [min] | Area [mAU*s] | Height [mAU] | Area %  |
|----------|---------------|------|-------------|--------------|--------------|---------|
| 1        | 8.473         | MM   | 0.2654      | 1.22859e4    | 771.41687    | 97.8253 |
| 2        | 13.711        | MM   | 0.4223      | 273.12241    | 10.77975     | 2.1747  |
| Totals : |               |      |             | 1.25591e4    | 782.19662    |         |

<sup>1</sup>H NMR of 6 (400 MHz, C<sub>6</sub>D<sub>6</sub>)

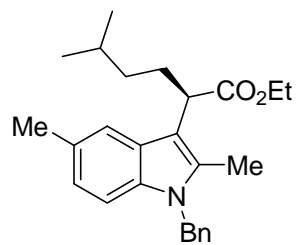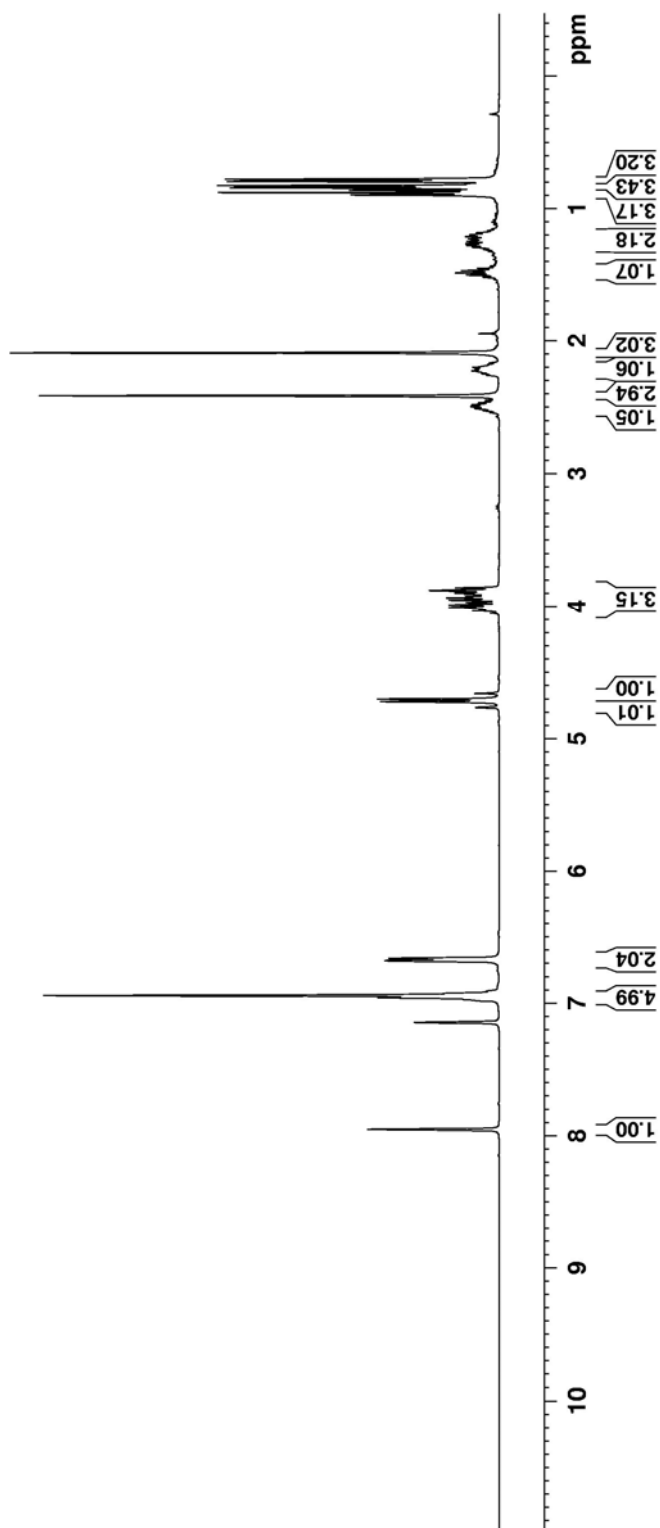

<sup>13</sup>C NMR spectrum of 6 (100 MHz, C<sub>6</sub>D<sub>6</sub>)

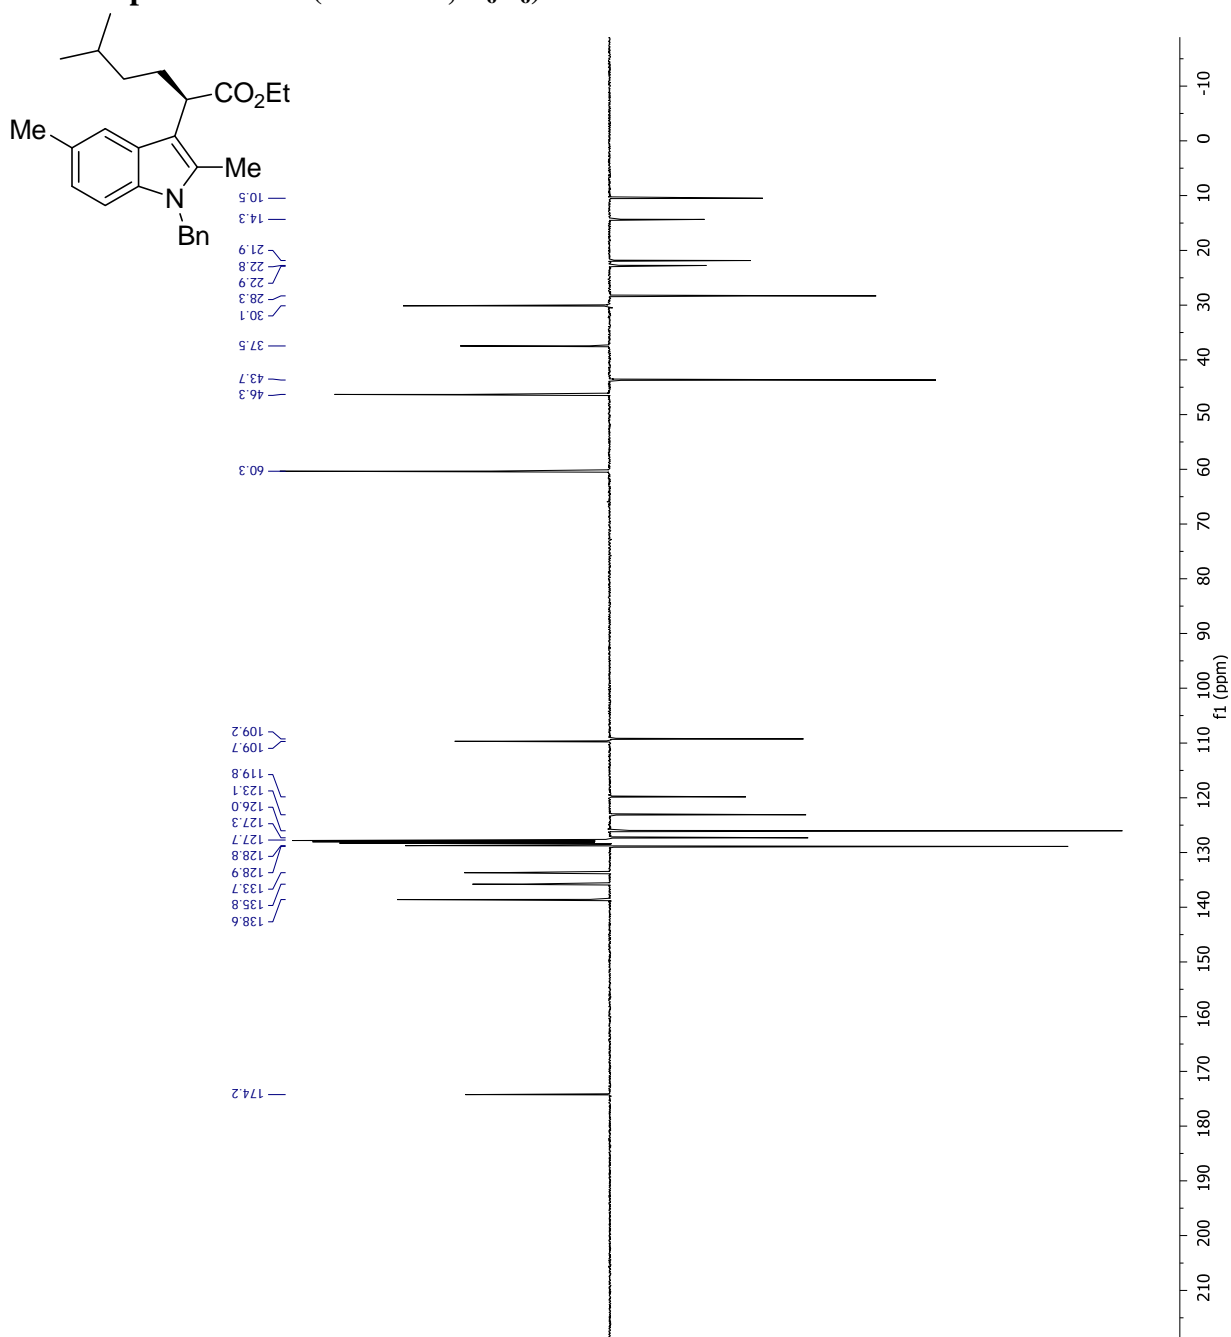

HPLC resolution of racemic **6** (Chiracel OD column, 99:1 hexanes:isopropanol – 97.5:2.5 hexanes isopropanol over 30 min, 1 mL/min, 220 nm)

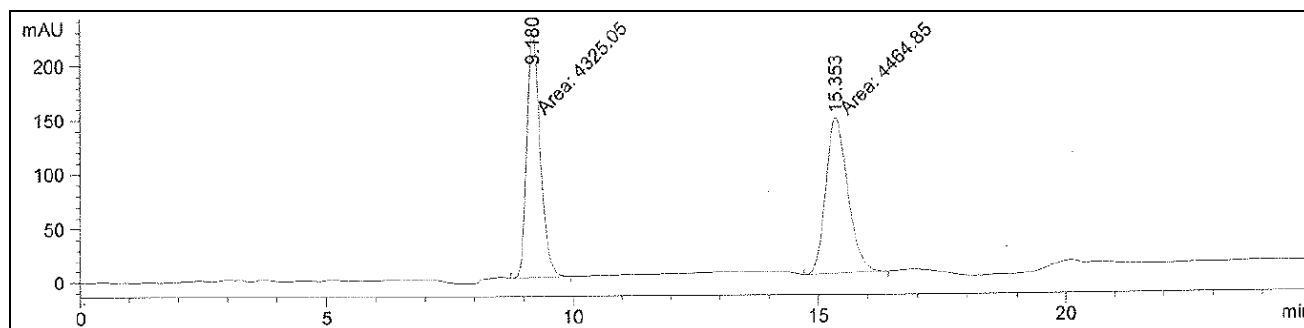

Enantiomeric excess of **6** (Chiracel OD column, 99:1 hexanes:isopropanol – 97.5:2.5 hexanes isopropanol over 30 min, 1 mL/min, 220 nm)

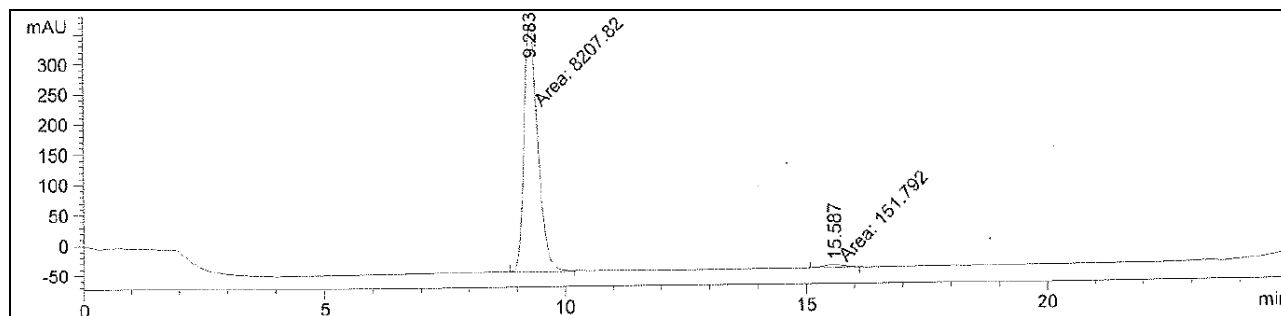

Signal 2: DAD1 B, Sig=220,4 Ref=450,80

| Peak #   | RetTime [min] | Type | Width [min] | Area [mAU*s] | Height [mAU] | Area %  |
|----------|---------------|------|-------------|--------------|--------------|---------|
| 1        | 9.283         | MM   | 0.3335      | 8207.82324   | 410.12985    | 98.1842 |
| 2        | 15.587        | MM   | 0.5357      | 151.79230    | 4.72264      | 1.8158  |
| Totals : |               |      |             | 8359.61554   | 414.85249    |         |

<sup>1</sup>H NMR of 7 (400 MHz, C<sub>6</sub>D<sub>6</sub>)

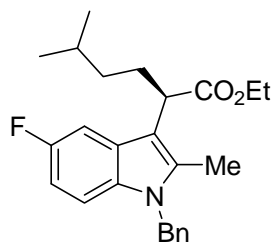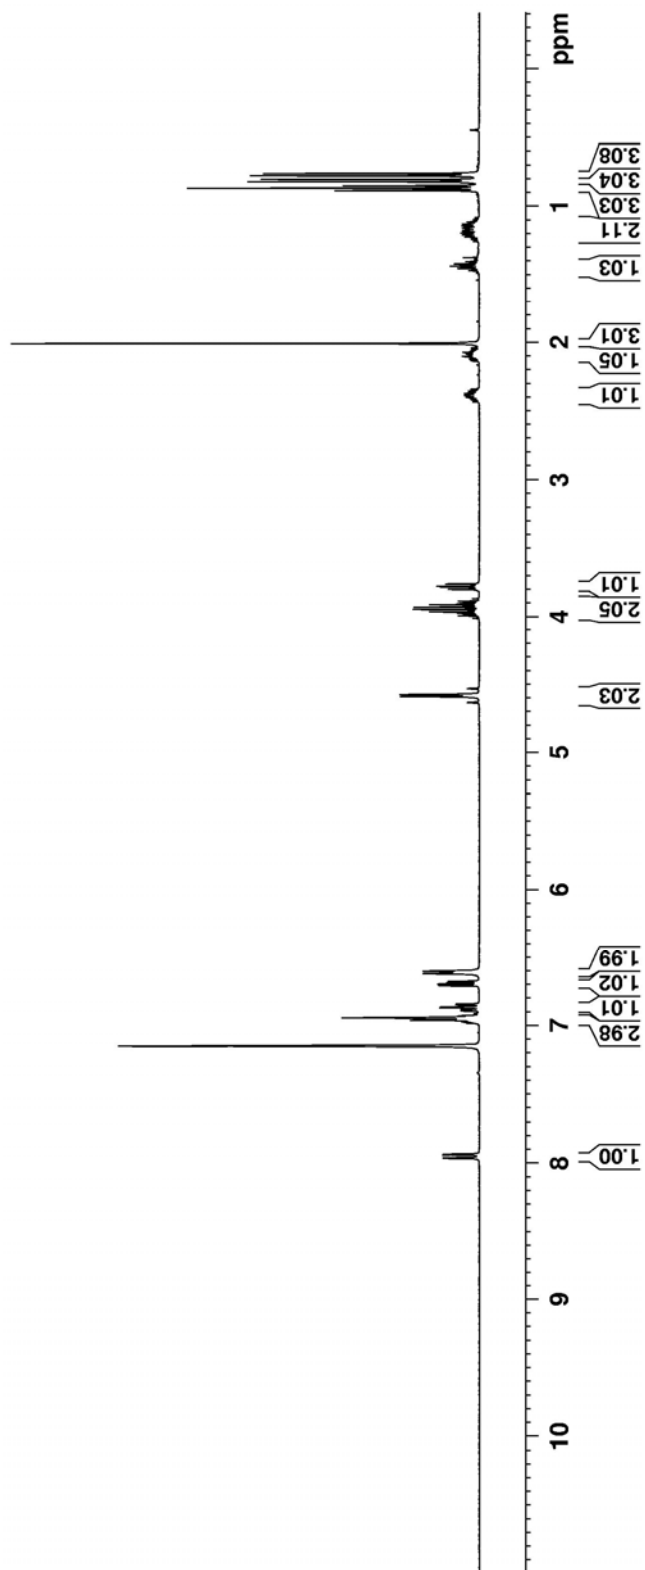

<sup>13</sup>C NMR spectrum of 7 (100 MHz, C<sub>6</sub>D<sub>6</sub>)

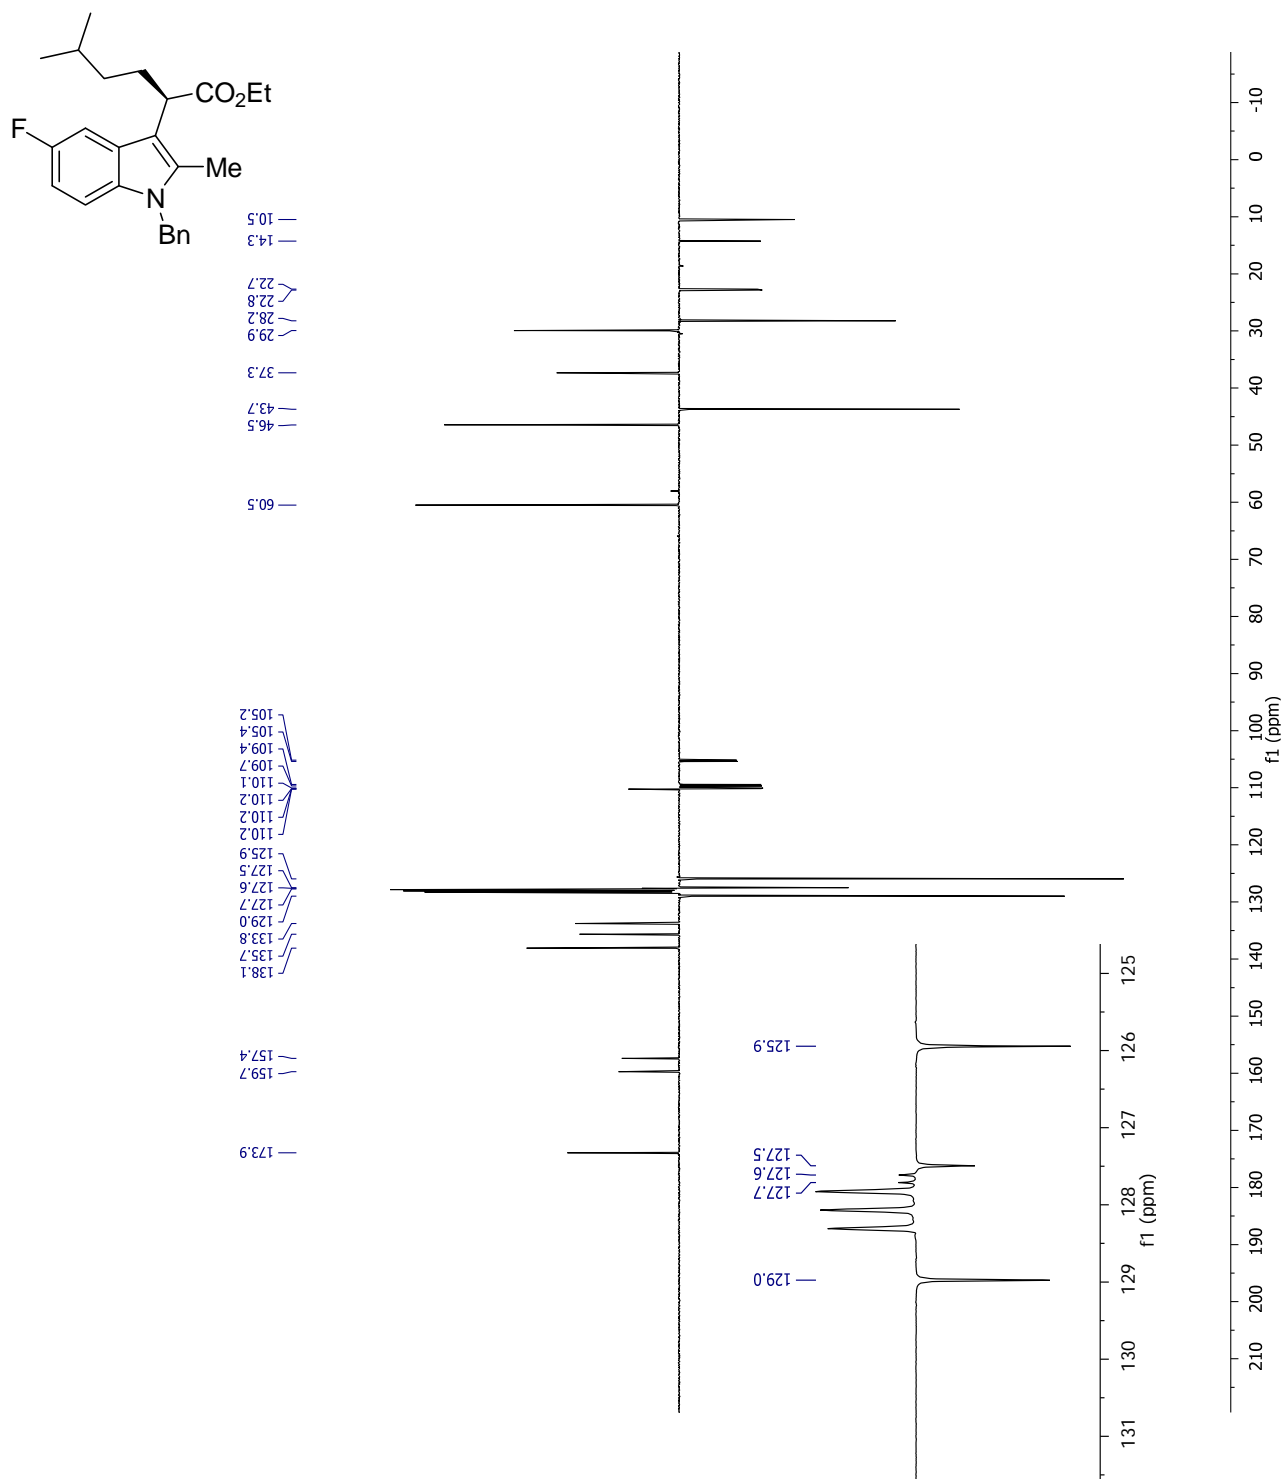

HPLC resolution of racemic **7** (Chiracel OD column, 99:1 hexanes:isopropanol – 97.5:2.5 hexanes isopropanol over 30 min, 1 mL/min, 220 nm)

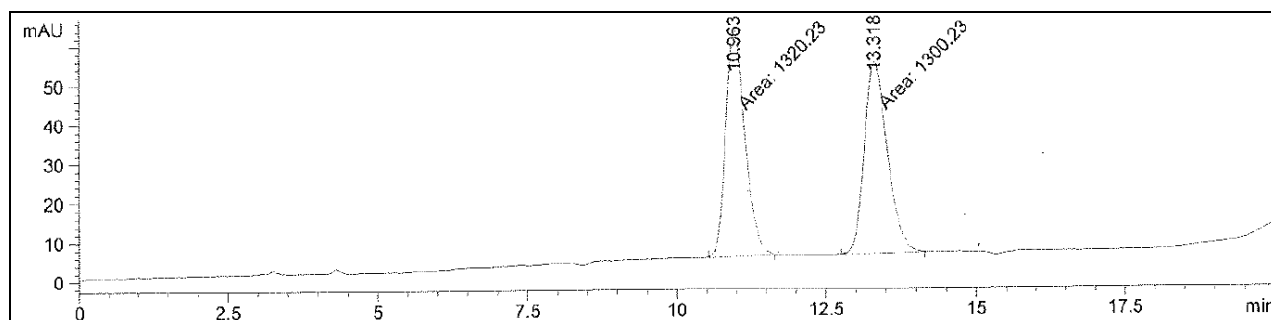

Enantiomeric excess of **7** (Chiracel OD column, 99:1 hexanes:isopropanol – 97.5:2.5 hexanes isopropanol over 30 min, 1 mL/min, 220 nm)

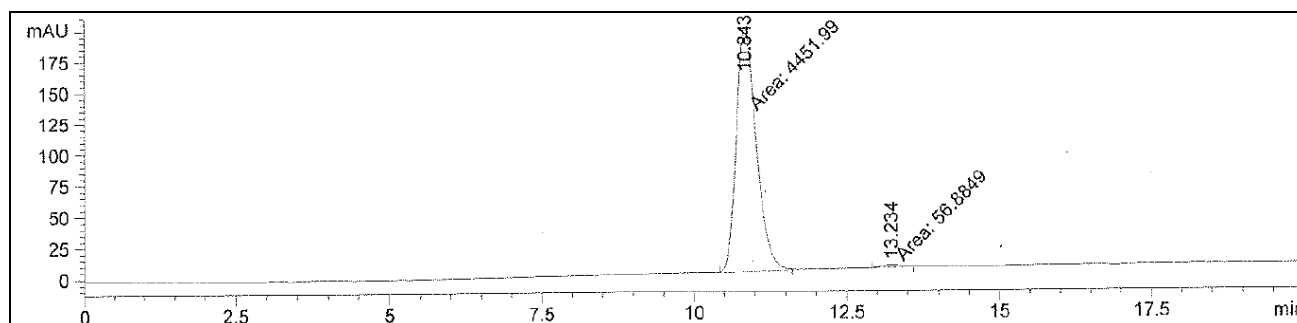

Signal 2: DAD1 B, Sig=220,4 Ref=450,80

| Peak #   | RetTime [min] | Type | Width [min] | Area [mAU*s] | Height [mAU] | Area %  |
|----------|---------------|------|-------------|--------------|--------------|---------|
| 1        | 10.843        | MM   | 0.3768      | 4451.98877   | 196.94476    | 98.7384 |
| 2        | 13.234        | MM   | 0.3965      | 56.88493     | 2.39118      | 1.2616  |
| Totals : |               |      |             | 4508.87370   | 199.33594    |         |



<sup>1</sup>H NMR of 8 (400 MHz, C<sub>6</sub>D<sub>6</sub>)

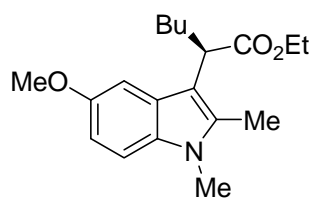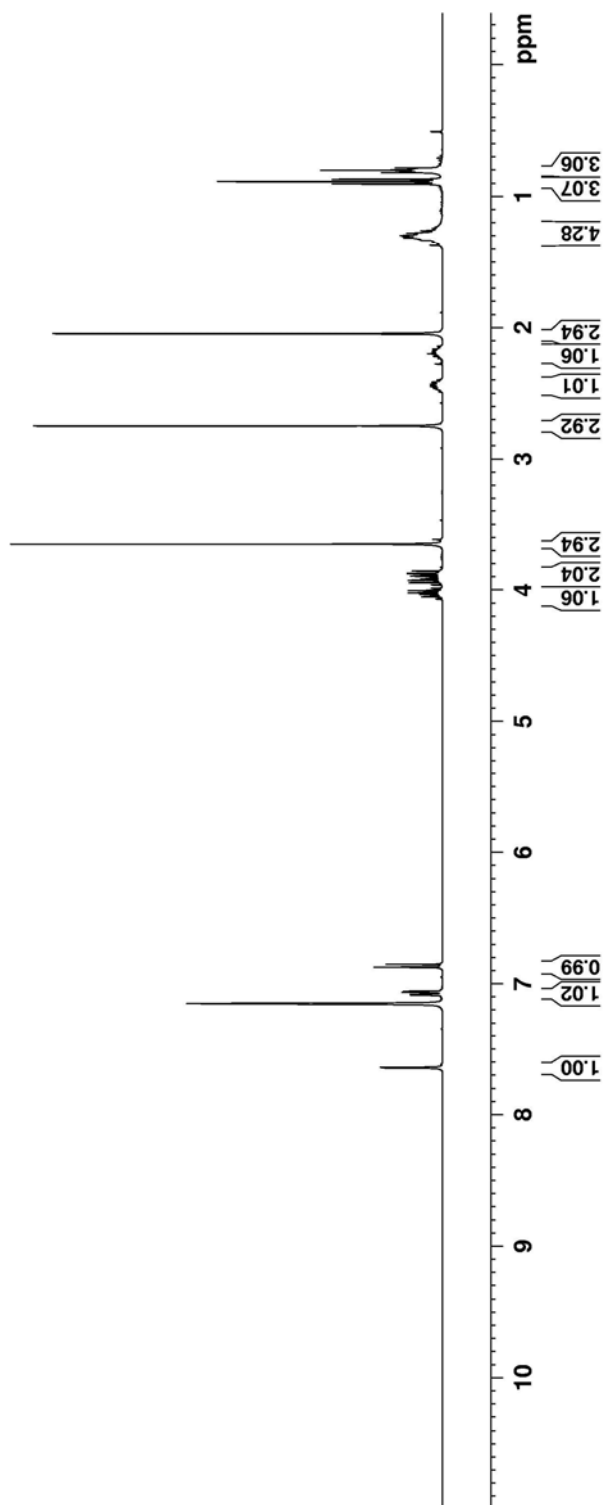

<sup>13</sup>C NMR spectrum of 8 (100 MHz, C<sub>6</sub>D<sub>6</sub>)

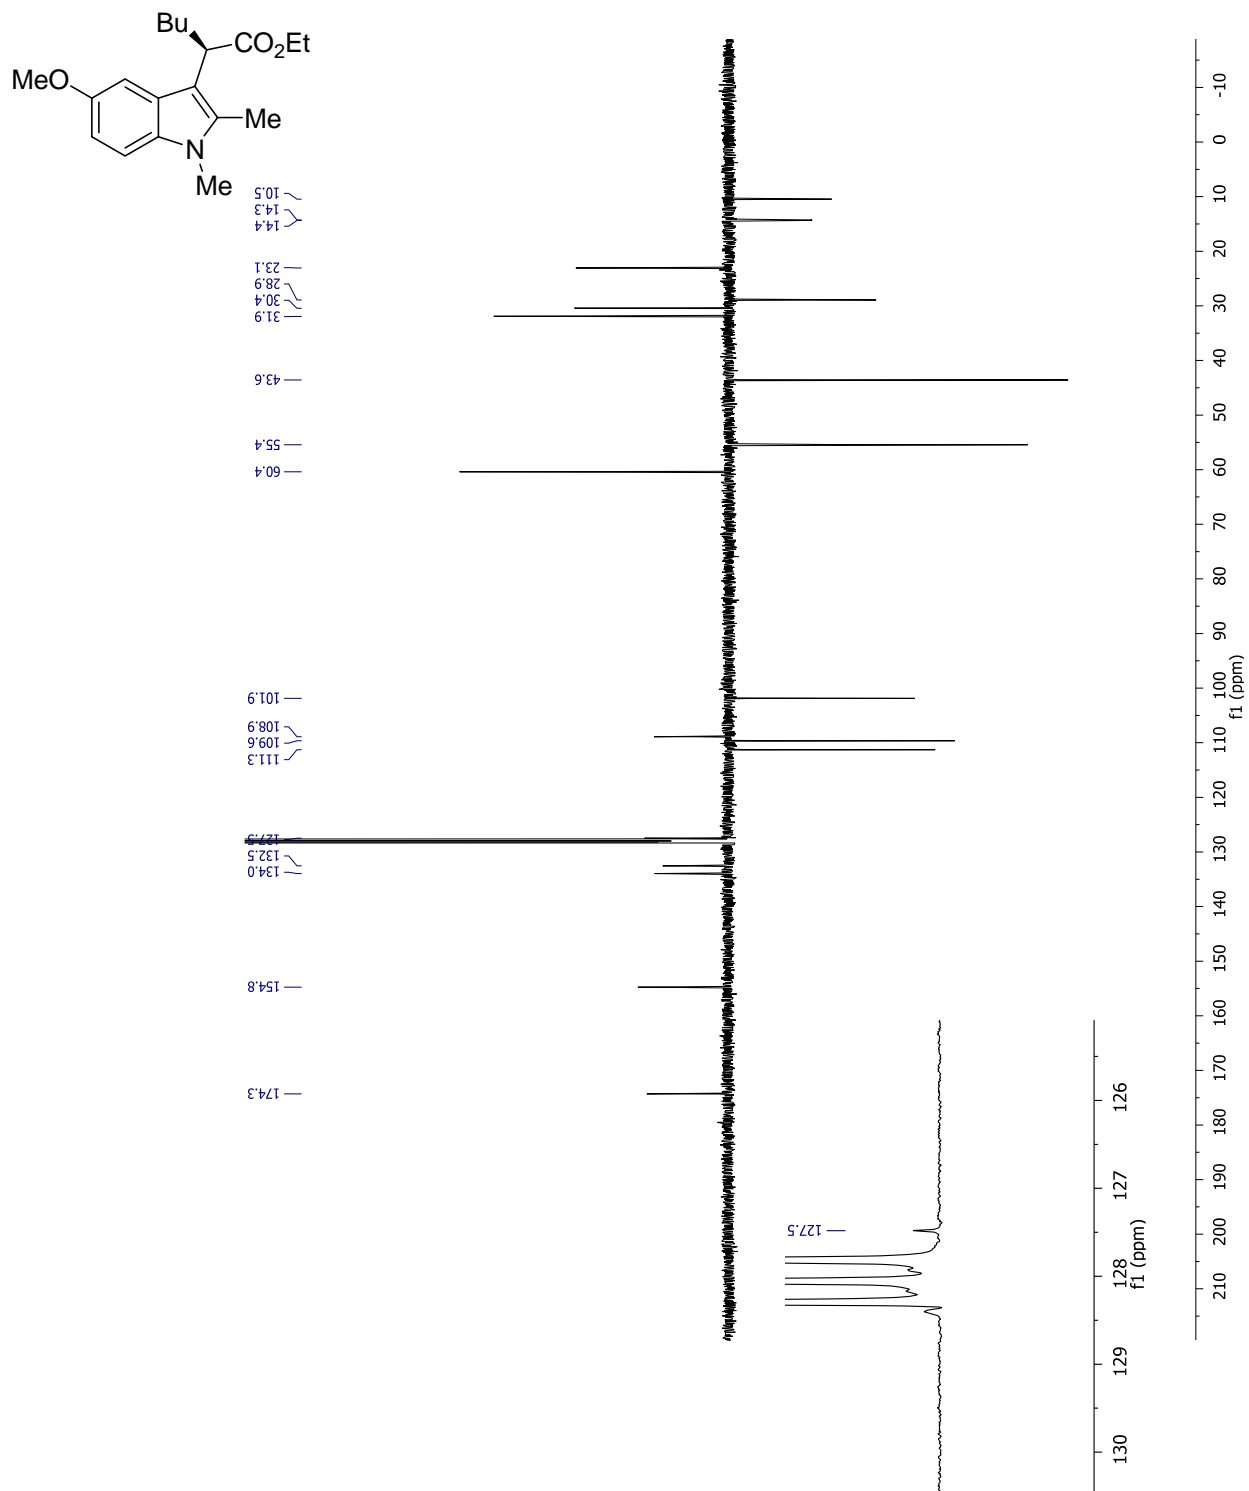

HPLC resolution of racemic **8** (Chiracel OD column, 99:1 hexanes:isopropanol, 1 mL/min, 275 nm)

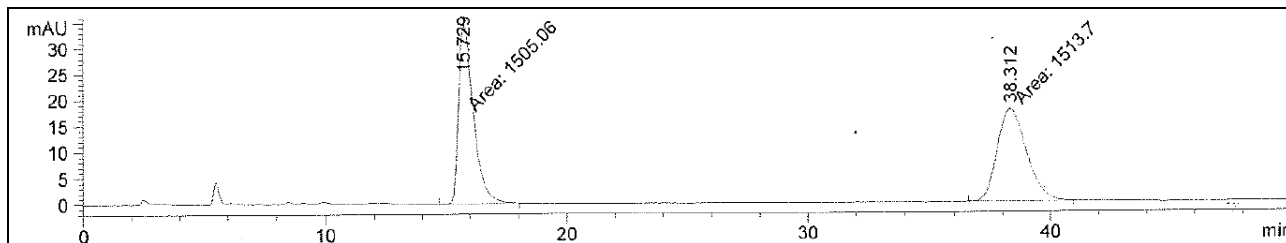

Enantiomeric excess of **8** (Chiracel OD column, 99:1 hexanes:isopropanol, 1 mL/min, 275 nm)

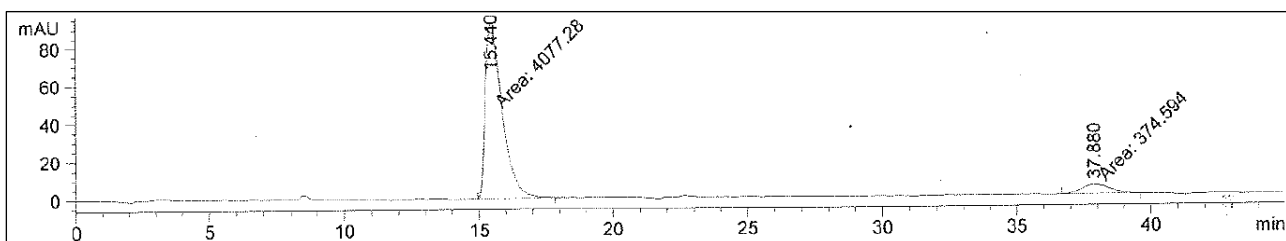

Signal 3: DAD1 C, Sig=275,4 Ref=450,80

| Peak #   | RetTime [min] | Type | Width [min] | Area [mAU*s] | Height [mAU] | Area %  |
|----------|---------------|------|-------------|--------------|--------------|---------|
| 1        | 15.440        | MM   | 0.7346      | 4077.27930   | 92.50456     | 91.5857 |
| 2        | 37.880        | MM   | 1.2845      | 374.59406    | 4.86045      | 8.4143  |
| Totals : |               |      |             | 4451.87335   | 97.36501     |         |

**<sup>1</sup>H NMR of 9 (400 MHz, C<sub>6</sub>D<sub>6</sub>) (94% purity)**

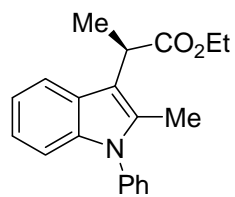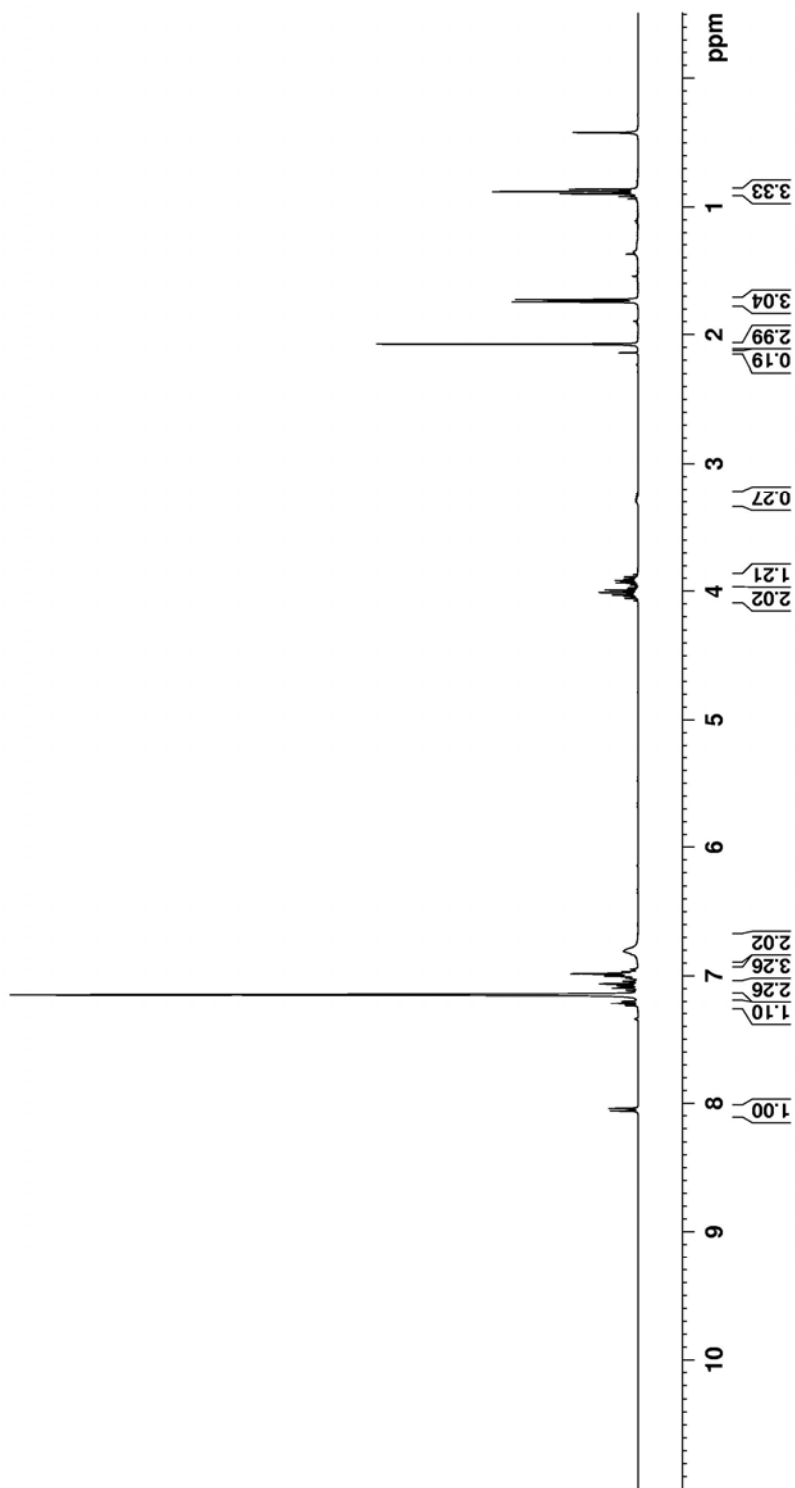

<sup>13</sup>C NMR spectrum of **9** (100 MHz, C<sub>6</sub>D<sub>6</sub>) (94% purity)

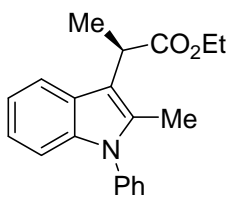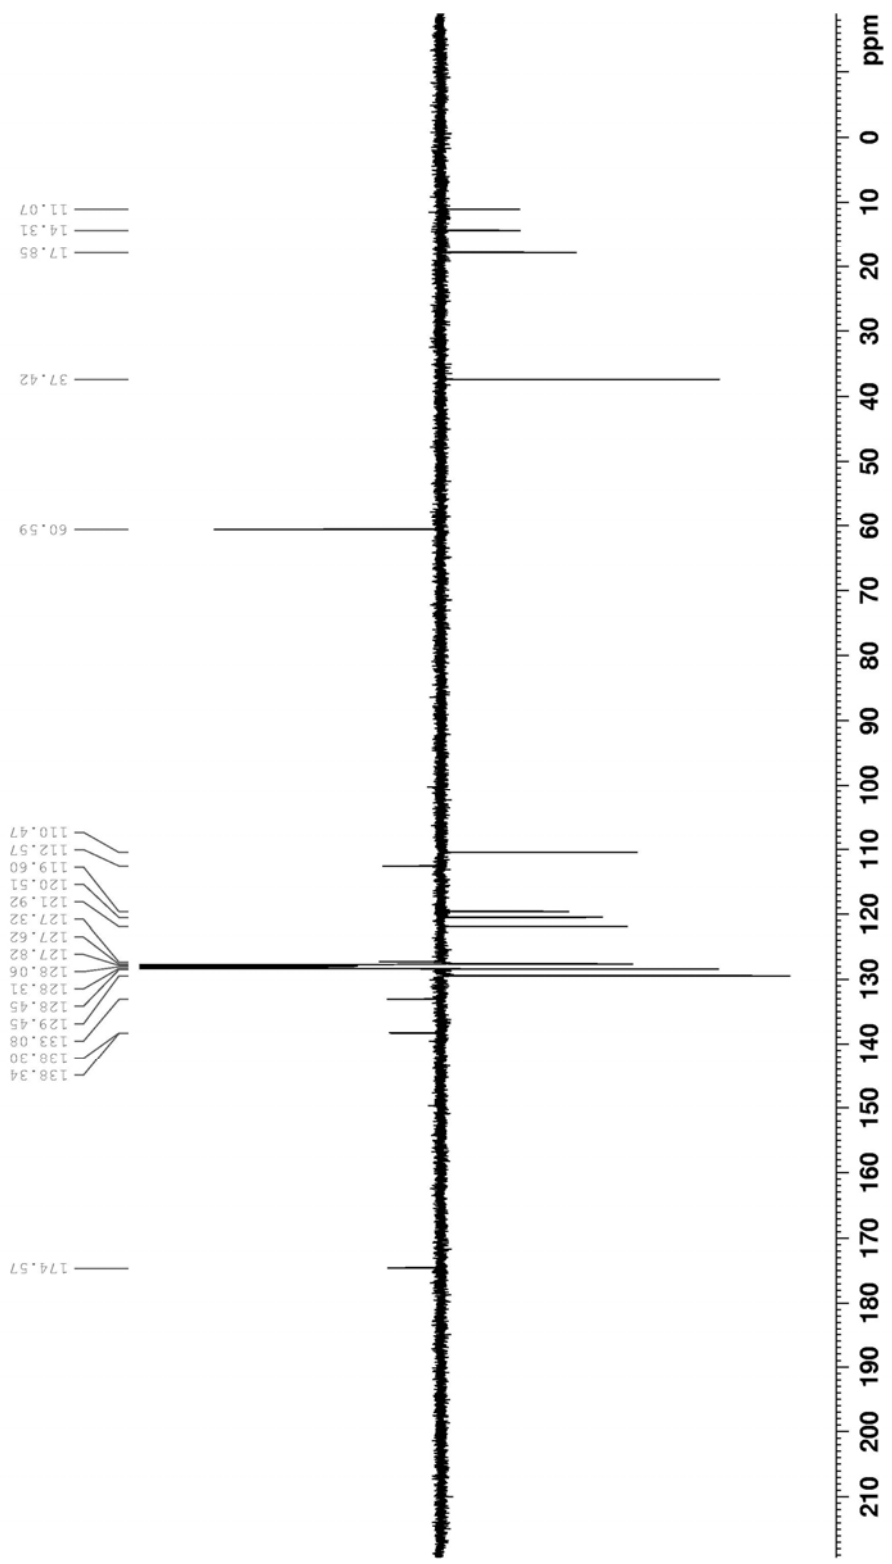

HPLC resolution of racemic **9** (Chiracel OD column, 99:1 hexanes:isopropanol, 1 mL/min, 275 nm)

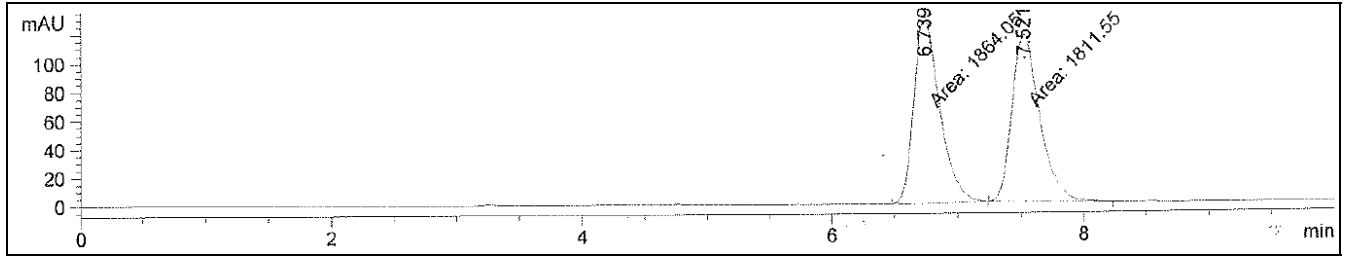

Enantiomeric excess of **9** (Chiracel OD column, 99:1 hexanes:isopropanol, 1 mL/min, 275 nm)

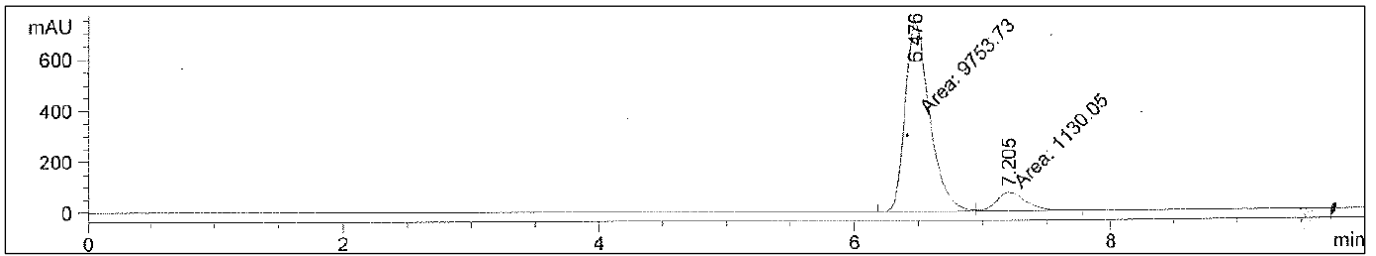

Signal 3: DAD1 C, Sig=275,4 Ref=450,80

| Peak #   | RetTime [min] | Type | Width [min] | Area [mAU*s] | Height [mAU] | Area %  |
|----------|---------------|------|-------------|--------------|--------------|---------|
| 1        | 6.476         | MF   | 0.2209      | 9753.73047   | 736.05188    | 89.6172 |
| 2        | 7.205         | FM   | 0.2591      | 1130.04529   | 72.68864     | 10.3828 |
| Totals : |               |      |             | 1.08838e4    | 808.74052    |         |

<sup>1</sup>H NMR of 10 (400 MHz, C<sub>6</sub>D<sub>6</sub>)

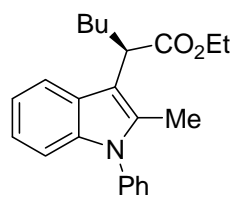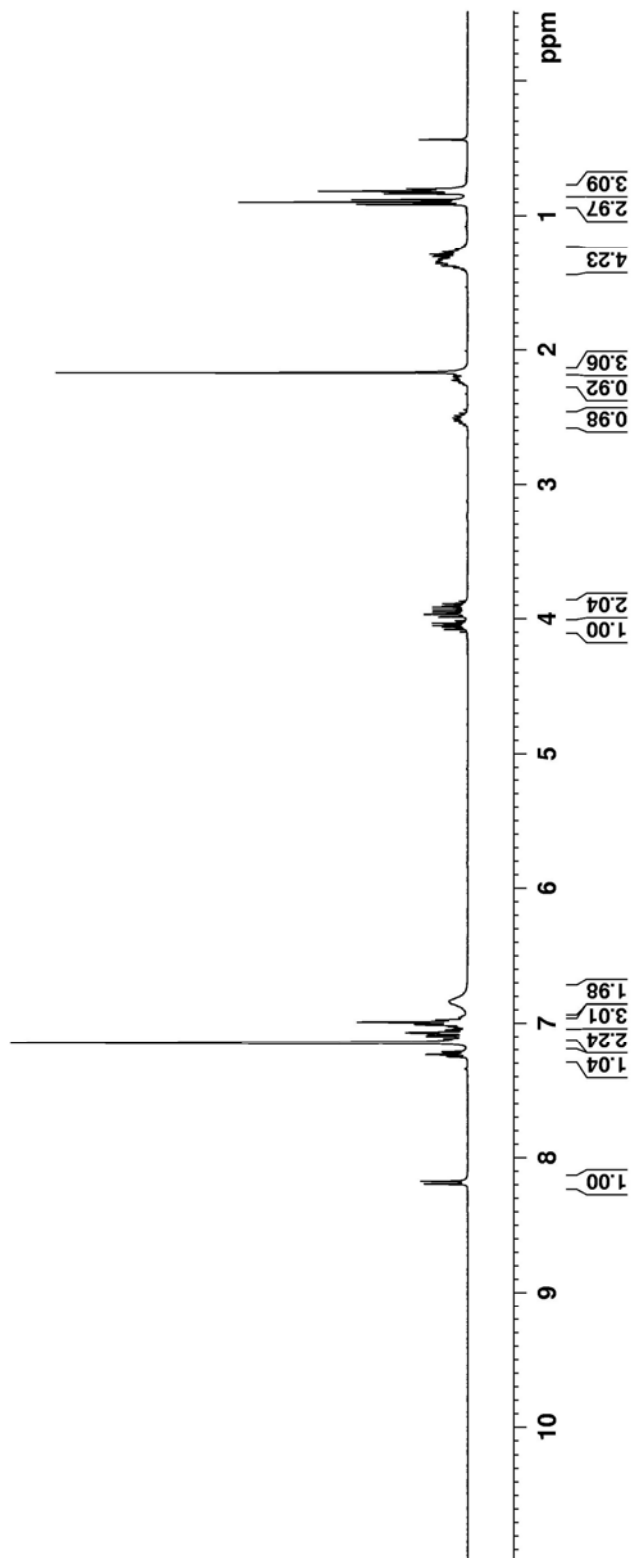

<sup>13</sup>C NMR spectrum of 10 (100 MHz, C<sub>6</sub>D<sub>6</sub>)

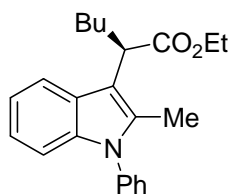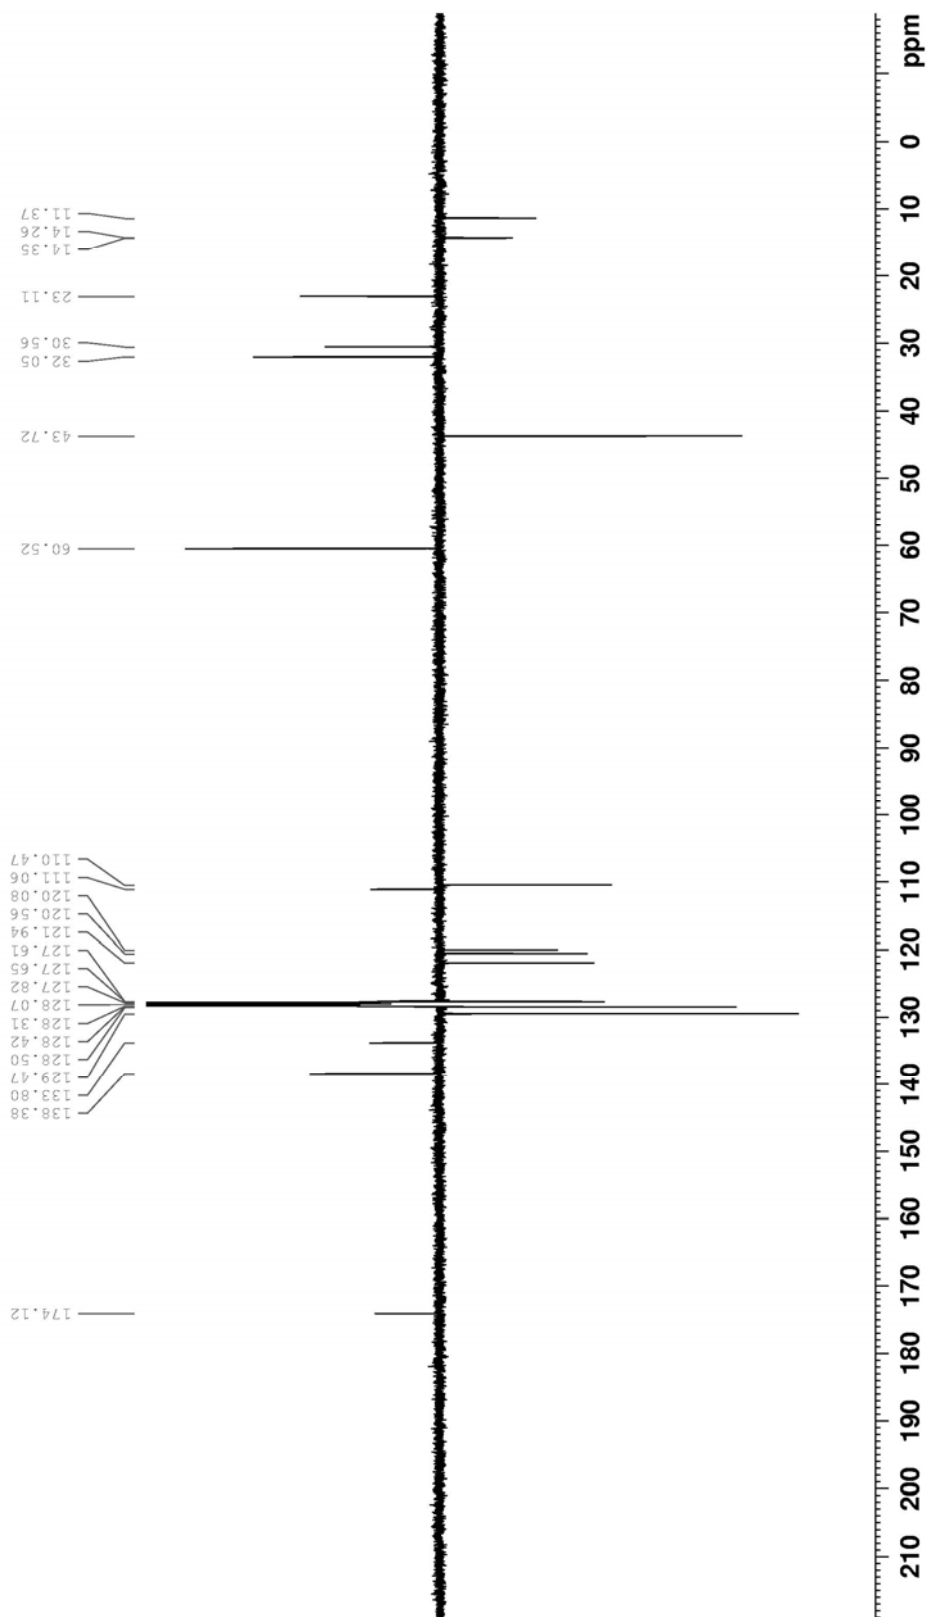



HPLC resolution of racemic **10** (Chiracel OD column, 99.5:0.5 hexanes:isopropanol, 1 mL/min, 220 nm)

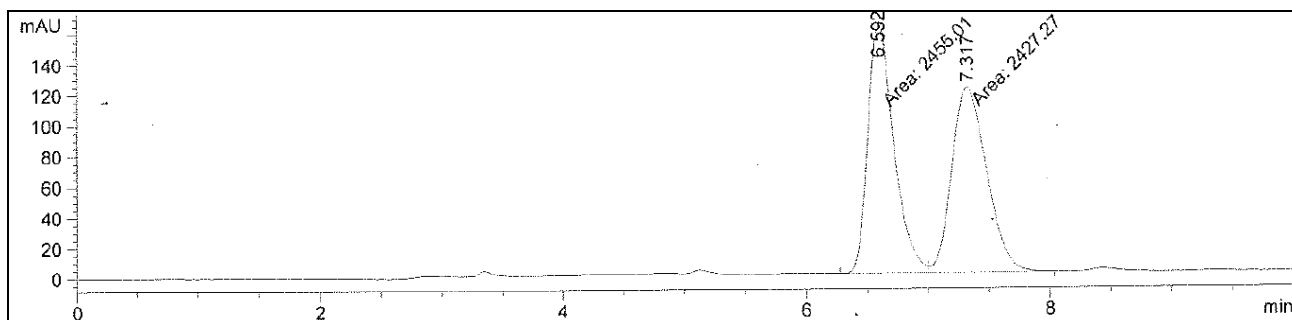

Enantiomeric excess of **10** (Chiracel OD column, 99.5:0.5 hexanes:isopropanol, 1 mL/min, 220 nm)

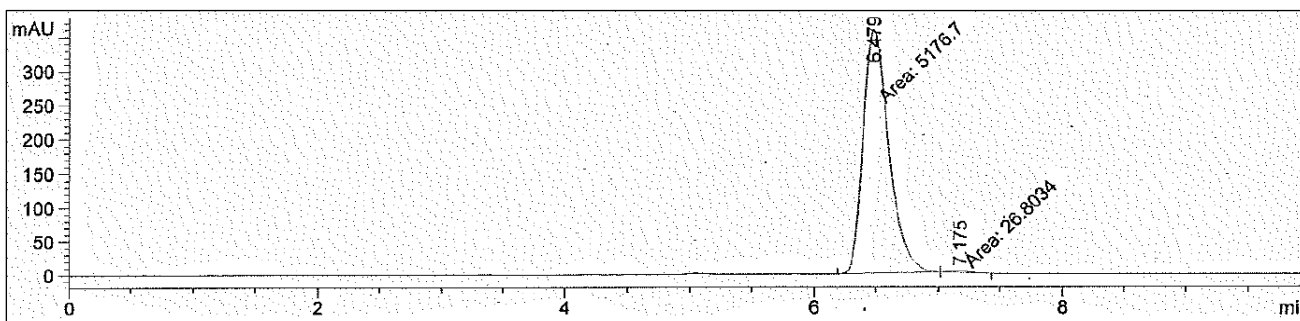

Signal 2: DAD1 B, Sig=220,4 Ref=450,80

| Peak #   | RetTime [min] | Type | Width [min] | Area [mAU*s] | Height [mAU] | Area %  |
|----------|---------------|------|-------------|--------------|--------------|---------|
| 1        | 6.479         | MM   | 0.2403      | 5176.70264   | 359.05667    | 99.4849 |
| 2        | 7.175         | MM   | 0.1988      | 26.80336     | 2.24681      | 0.5151  |
| Totals : |               |      |             | 5203.50599   | 361.30348    |         |

<sup>1</sup>H NMR of 11 (400 MHz, C<sub>6</sub>D<sub>6</sub>)

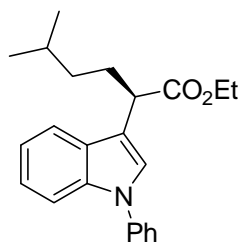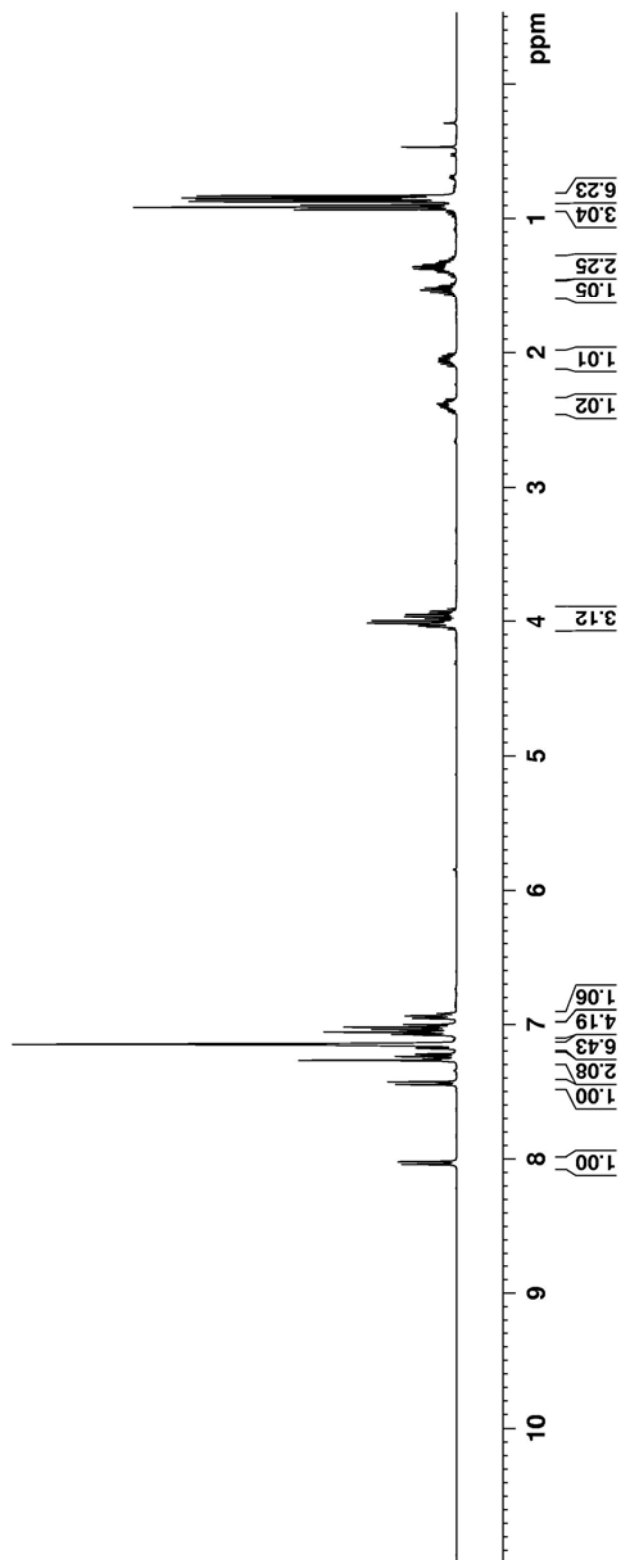

<sup>13</sup>C NMR spectrum of 11 (100 MHz, C<sub>6</sub>D<sub>6</sub>)

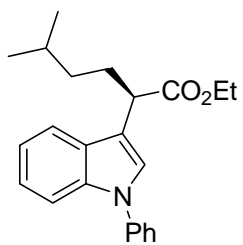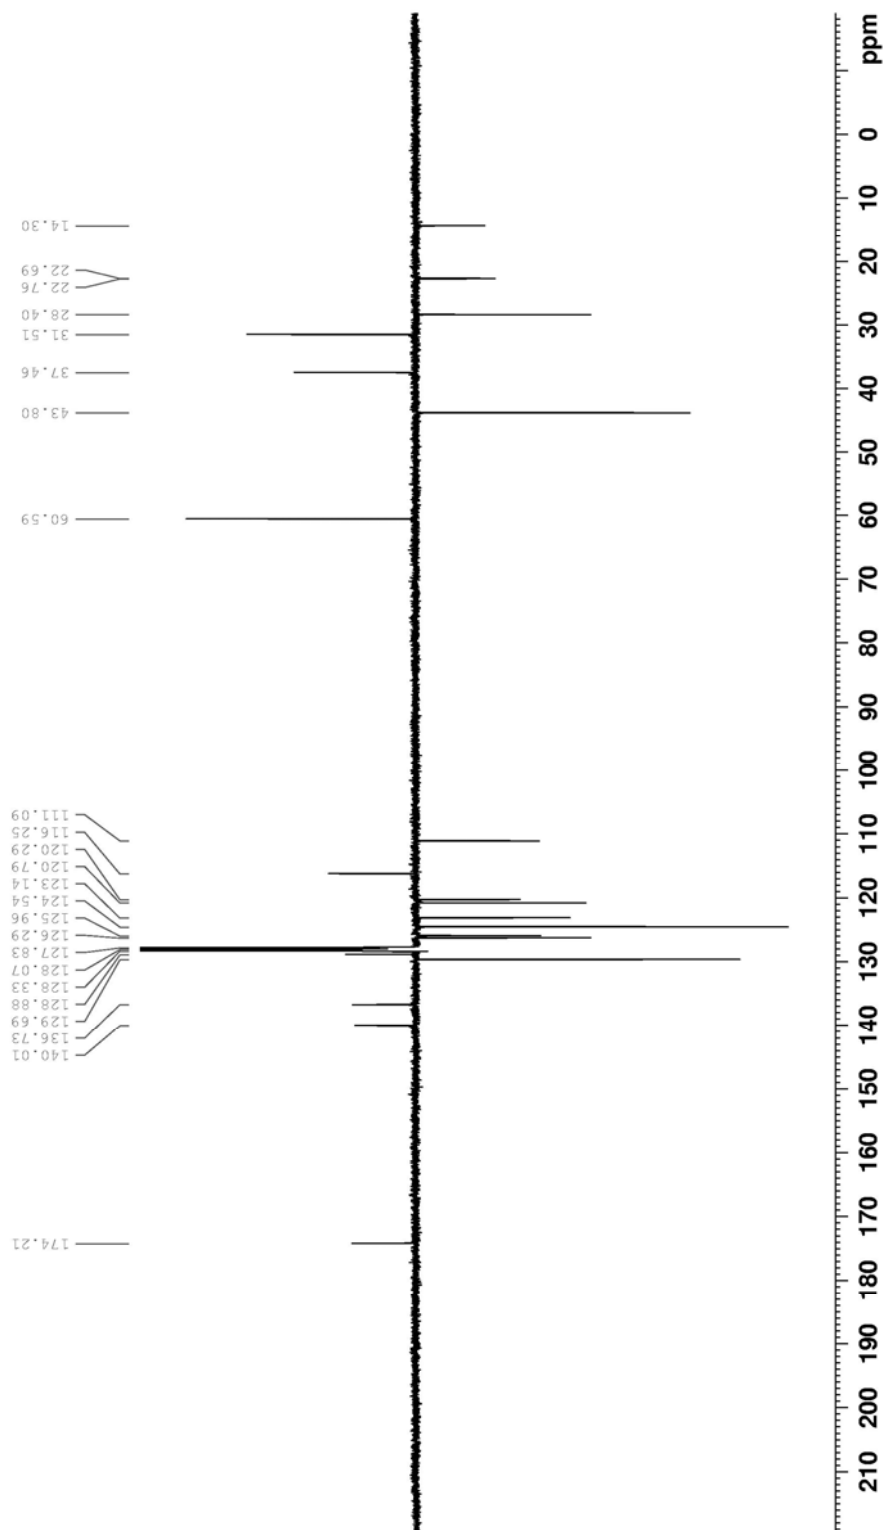

HPLC resolution of racemic **11** (Chiracel OD column, 99:1 hexanes:isopropanol, 1 mL/min, 275 nm)

NOTE: Preparation of racemic **11** using Rh<sub>2</sub>Piv<sub>4</sub> gave the indole C-H functionalization product and the product of alkene cyclopropanation in a 1:1 ratio.

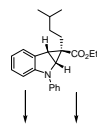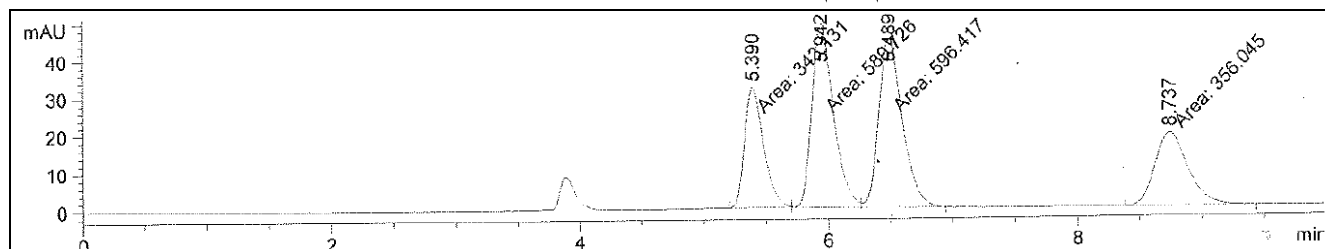

Enantiomeric excess of **11** (Chiracel OD column, 99:1 hexanes:isopropanol, 1 mL/min, 275 nm)

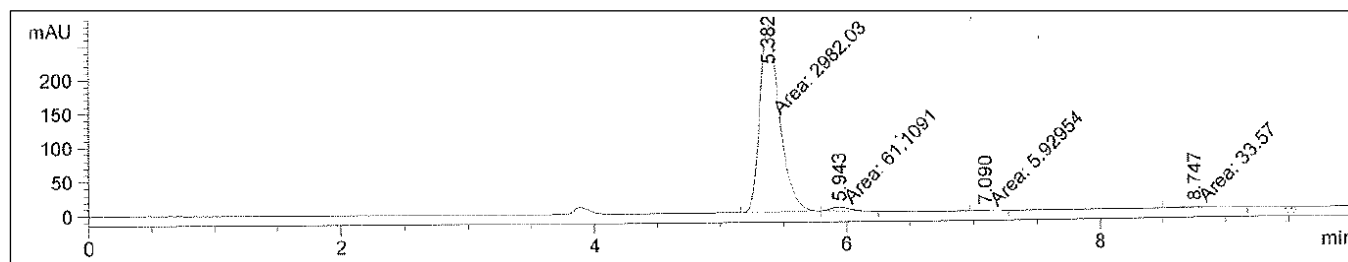

Signal 3: DAD1 C, Sig=275,4 Ref=450,80

| Peak #   | RetTime [min] | Type | Width [min] | Area [mAU*s] | Height [mAU] | Area %  |
|----------|---------------|------|-------------|--------------|--------------|---------|
| 1        | 5.382         | MM   | 0.1792      | 2982.02515   | 277.29205    | 96.7363 |
| 2        | 5.943         | MM   | 0.1815      | 61.10906     | 5.61121      | 1.9824  |
| 3        | 7.090         | MM   | 0.1791      | 5.92954      | 5.51896e-1   | 0.1924  |
| 4        | 8.747         | MM   | 0.2943      | 33.57003     | 1.90101      | 1.0890  |
| Totals : |               |      |             | 3082.63377   | 285.35616    |         |

<sup>1</sup>H NMR of 12 (400 MHz, C<sub>6</sub>D<sub>6</sub>) (95% purity)

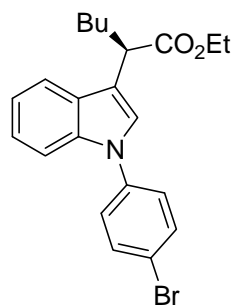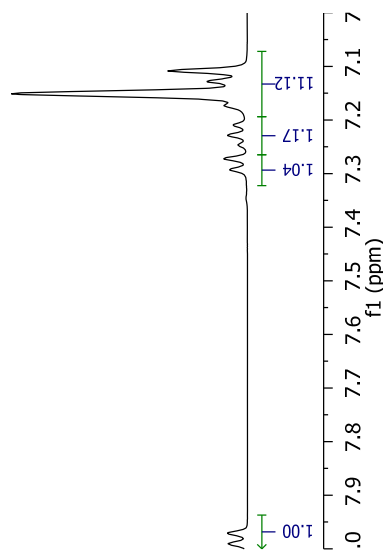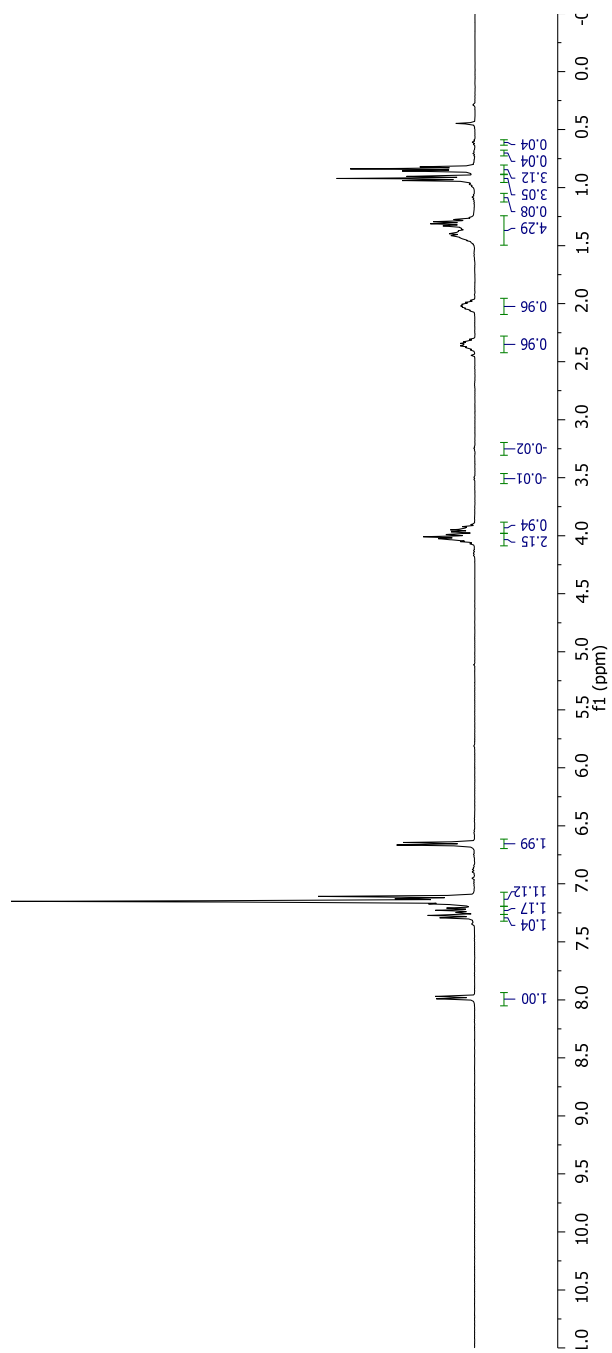

<sup>13</sup>C NMR spectrum of 12 (100 MHz, C<sub>6</sub>D<sub>6</sub>) (95% purity)

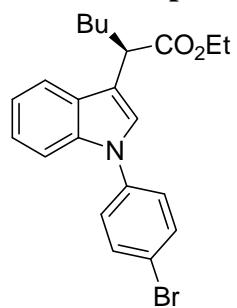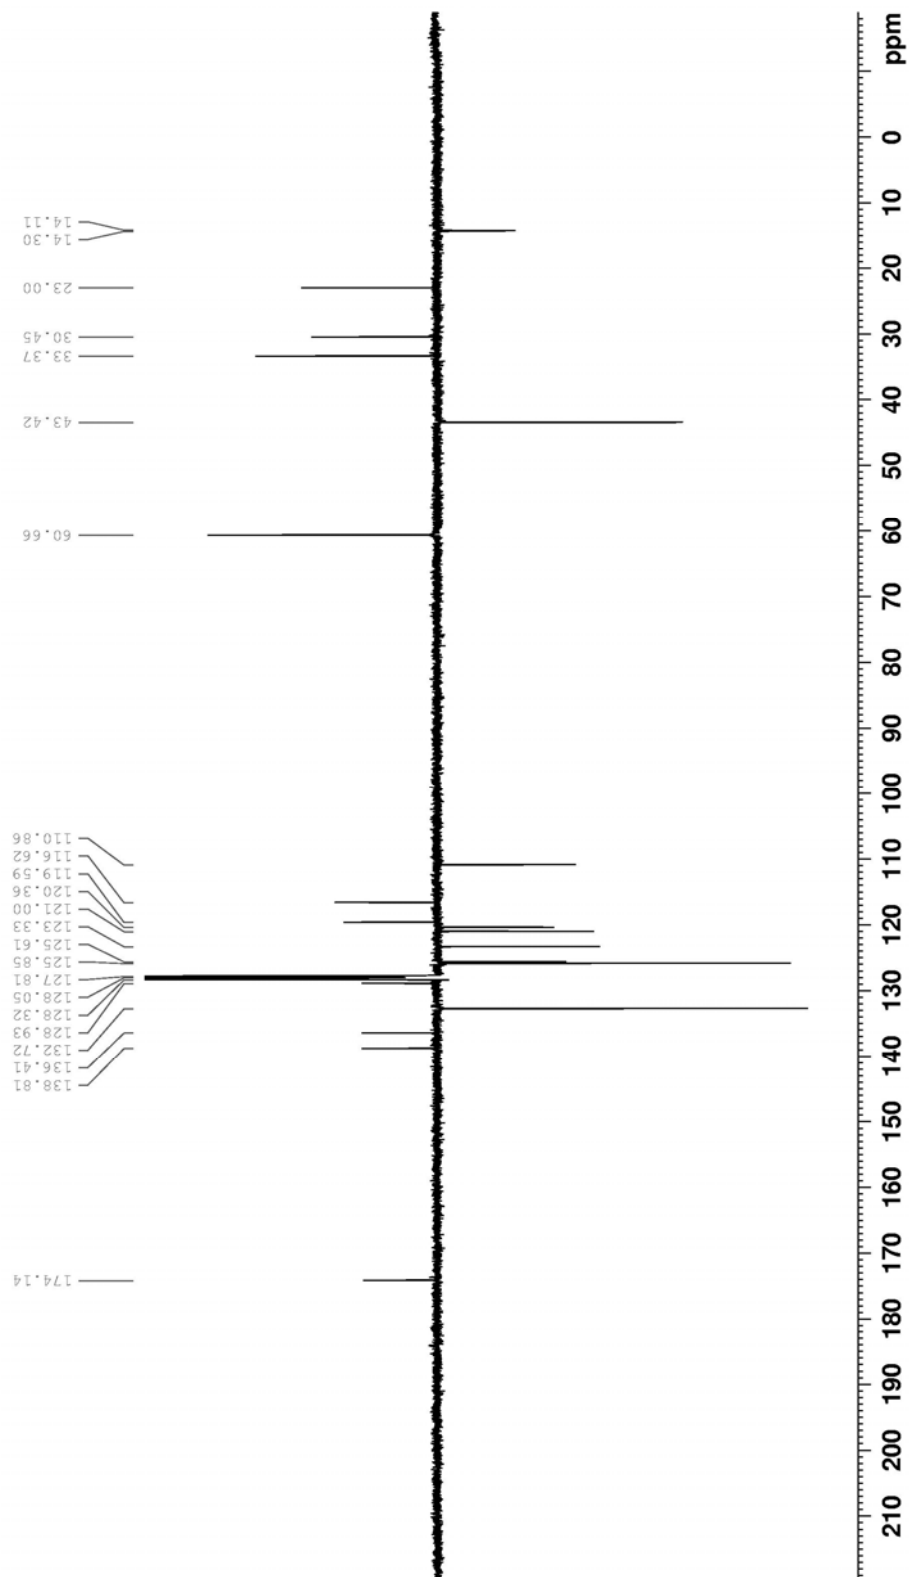

HPLC resolution of racemic **12** (Chiracel OD column, 99:1 hexanes:isopropanol, 1 mL/min, 275 nm)

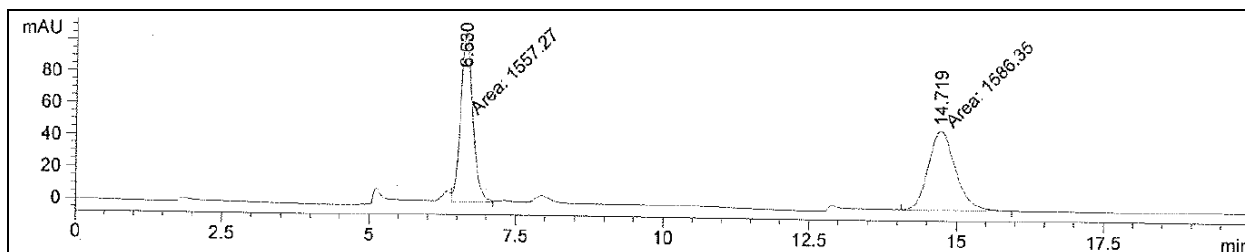

Enantiomeric excess of **12** (Chiracel OD column, 99:1 hexanes:isopropanol, 1 mL/min, 275 nm)

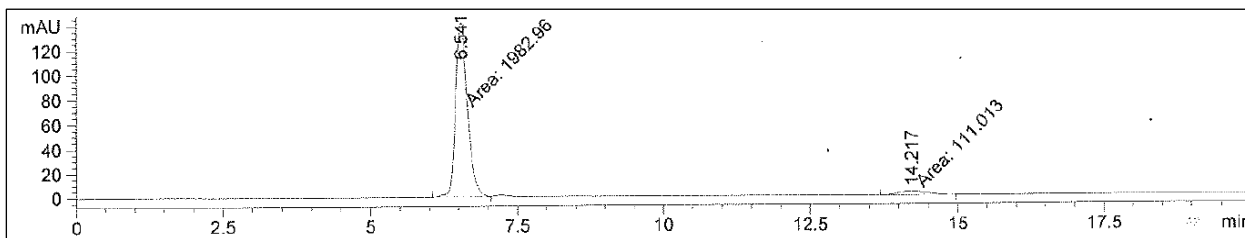

Signal 3: DAD1 C, Sig=275,4 Ref=450,80

| Peak #   | RetTime [min] | Type | Width [min] | Area [mAU*s] | Height [mAU] | Area %  |
|----------|---------------|------|-------------|--------------|--------------|---------|
| 1        | 6.541         | MM   | 0.2328      | 1982.95935   | 141.97328    | 94.6985 |
| 2        | 14.217        | MM   | 0.5351      | 111.01264    | 3.45758      | 5.3015  |
| Totals : |               |      |             | 2093.97199   | 145.43086    |         |

<sup>1</sup>H NMR of 13 (400 MHz, C<sub>6</sub>D<sub>6</sub>)

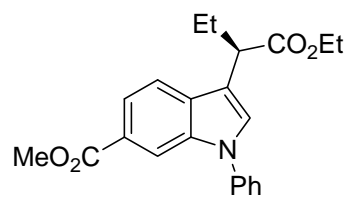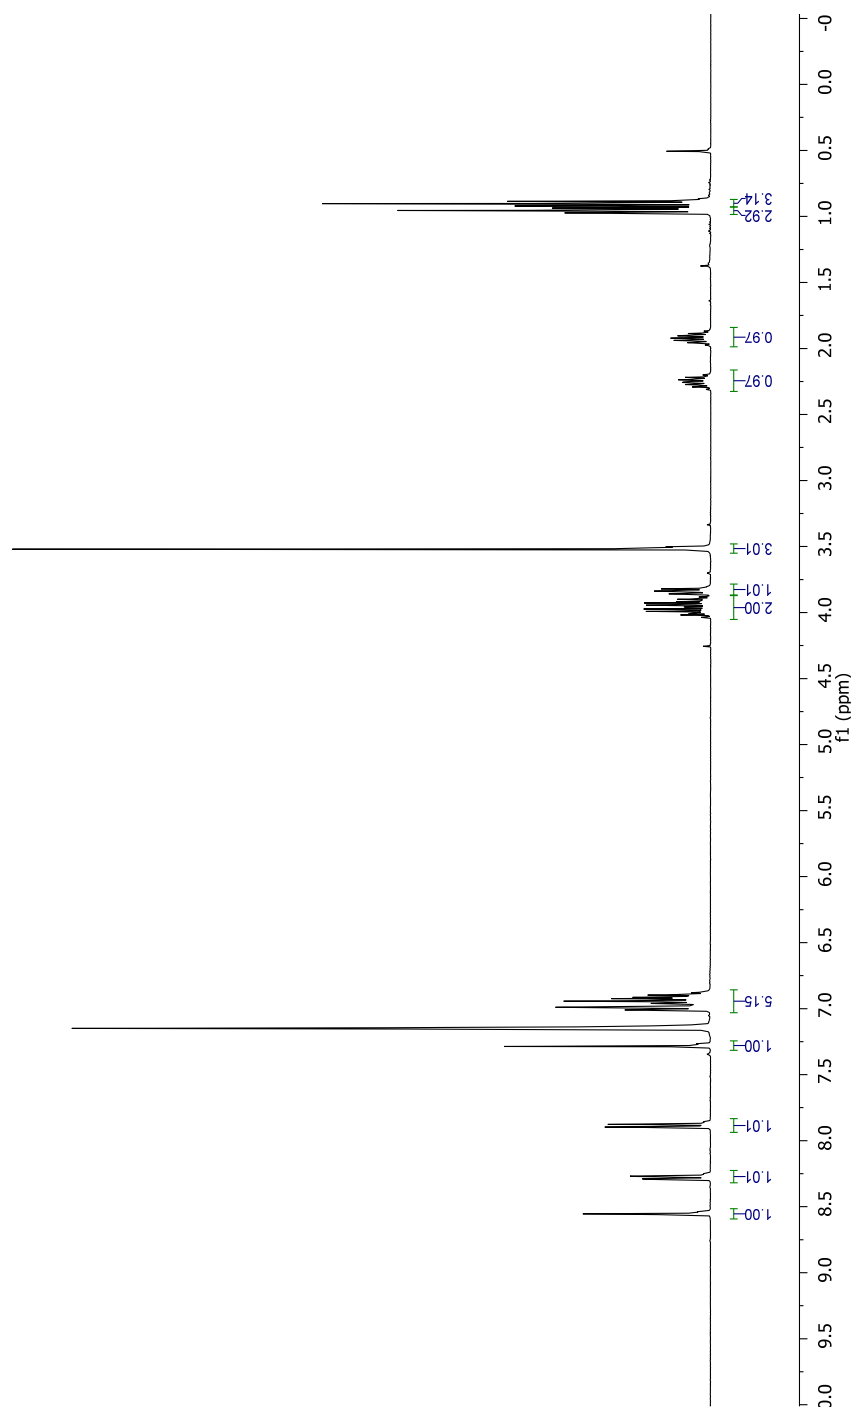



<sup>13</sup>C NMR of 13 (100 MHz, C<sub>6</sub>D<sub>6</sub>)

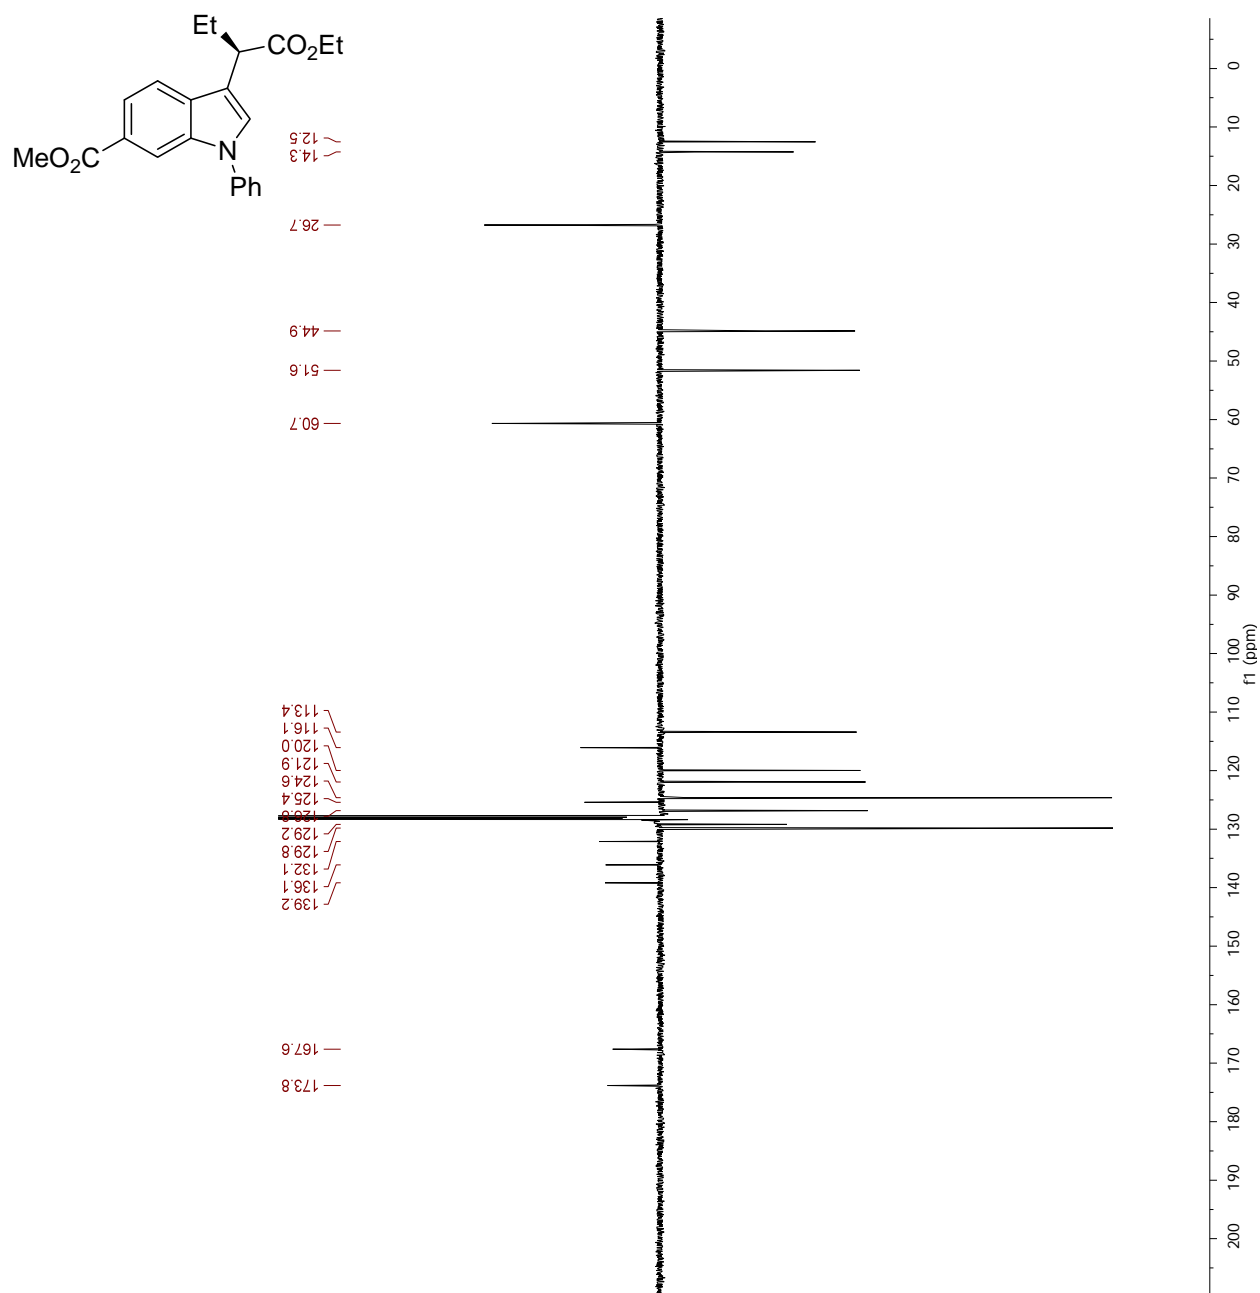

HPLC resolution of racemic **13** (Chiracel IA column, 99:1 hexanes:isopropanol, 1 mL/min, 220 nm)

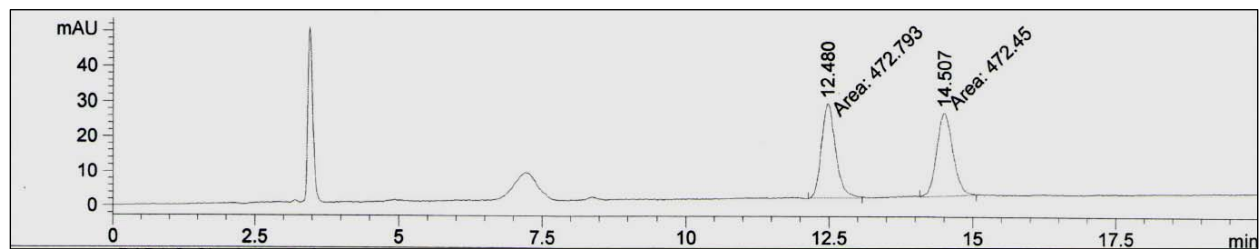

Enantiomeric excess of **13** (Chiracel IA column, 99:1 hexanes:isopropanol, 1 mL/min, 220 nm)

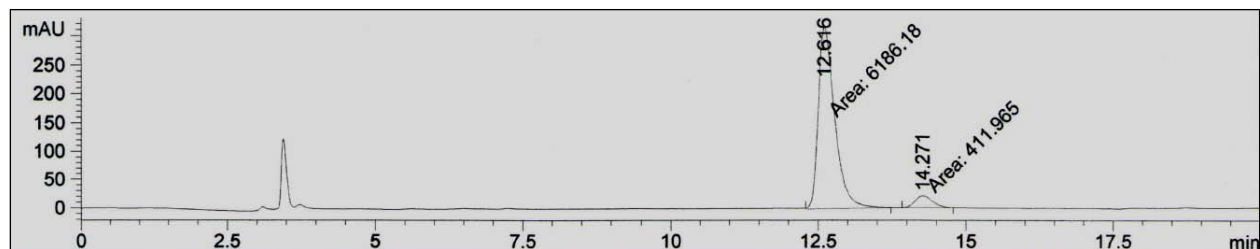

Signal 2: DAD1 B, Sig=220,4 Ref=450,80

| Peak #   | RetTime [min] | Type | Width [min] | Area [mAU*s] | Height [mAU] | Area %  |
|----------|---------------|------|-------------|--------------|--------------|---------|
| 1        | 12.616        | MM   | 0.3276      | 6186.17871   | 314.73395    | 93.7563 |
| 2        | 14.271        | MM   | 0.3407      | 411.96527    | 20.15228     | 6.2437  |
| Totals : |               |      |             | 6598.14398   | 334.88623    |         |

**<sup>1</sup>H NMR of 14 (400 MHz, CD<sub>2</sub>Cl<sub>2</sub>)**

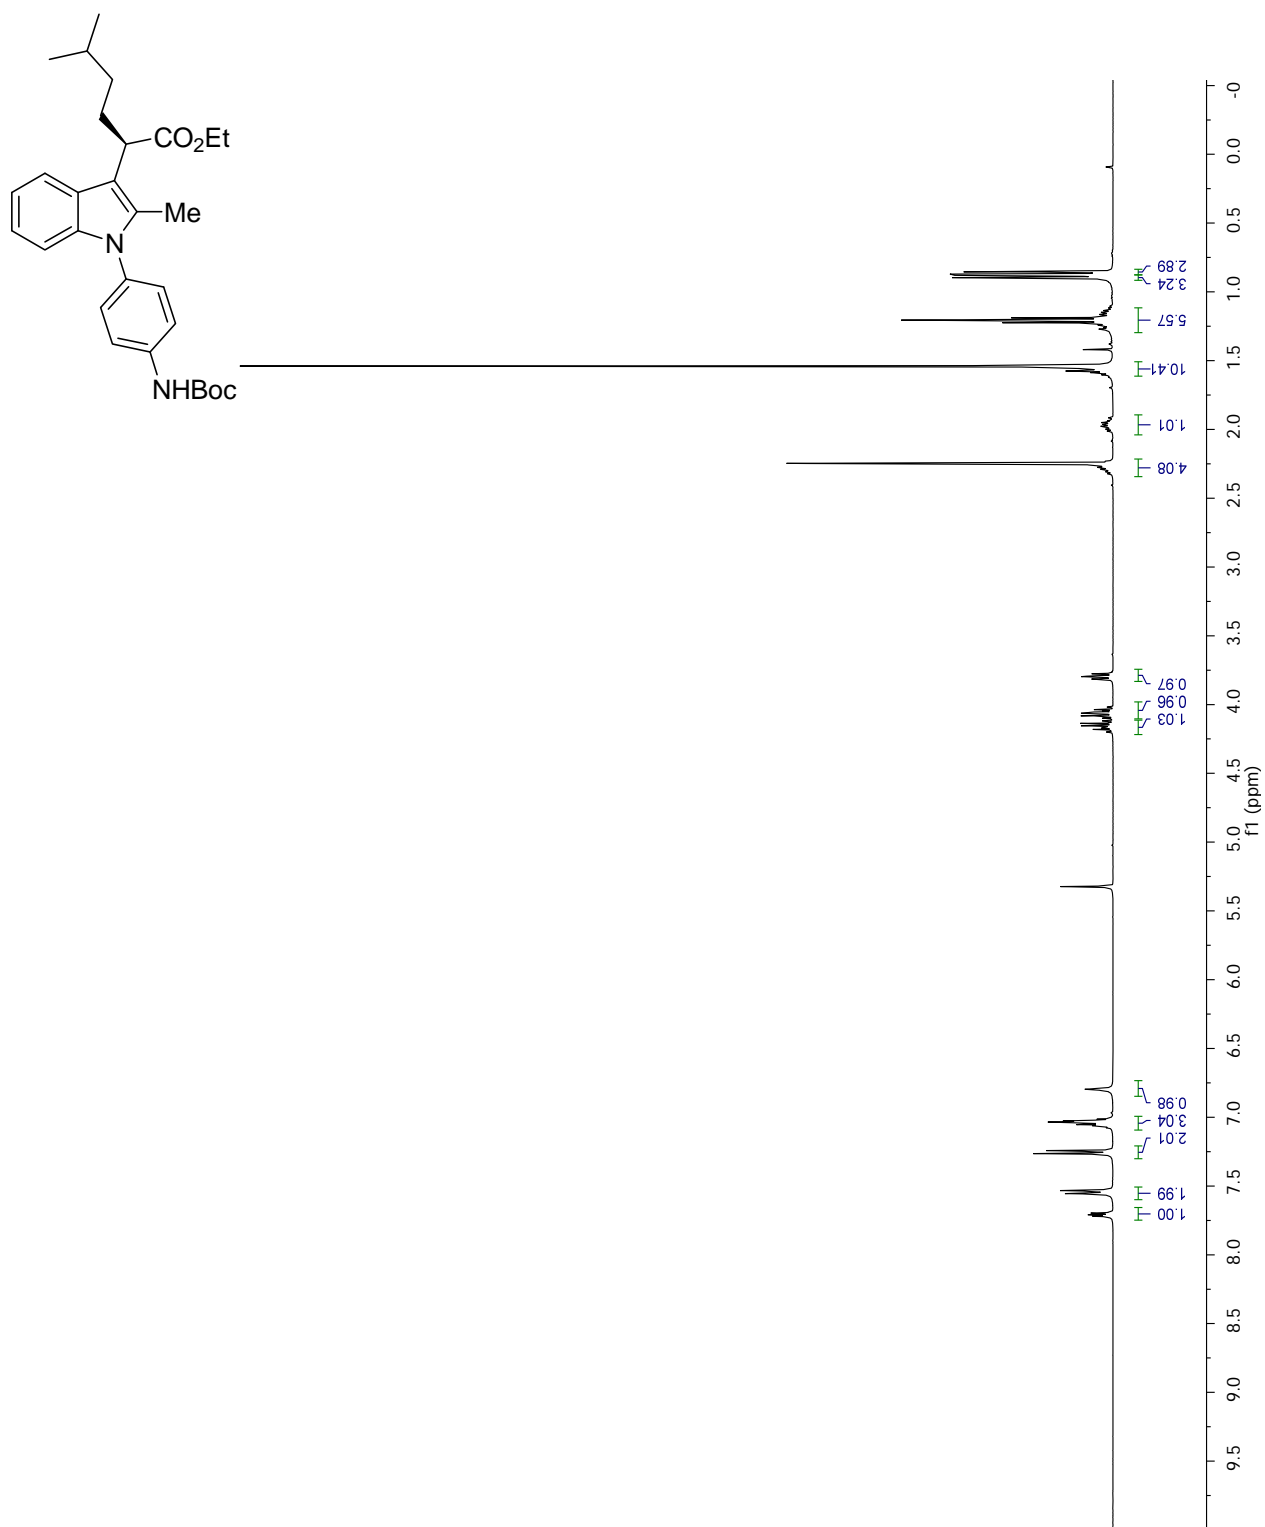

<sup>13</sup>C NMR of 14 (100 MHz, CD<sub>2</sub>Cl<sub>2</sub>)

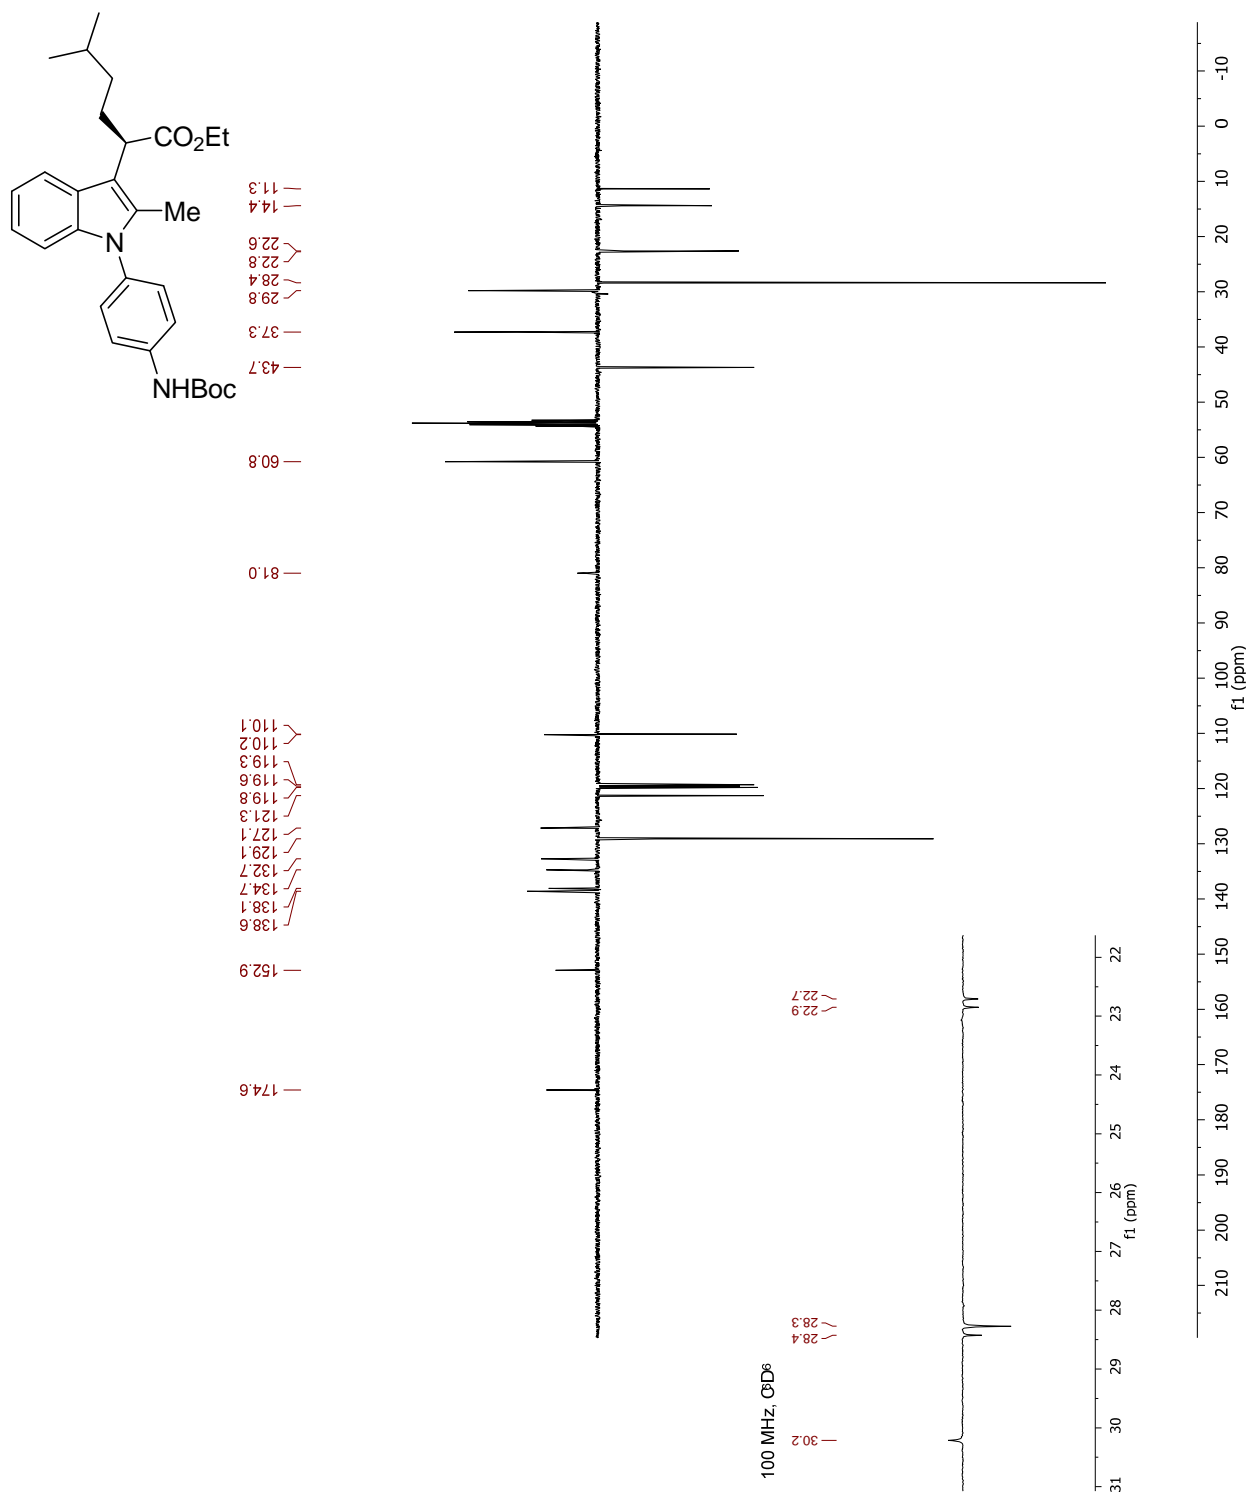

HPLC resolution of racemic **14** (Chiracel IA column, 99.5:0.5 hexanes:isopropanol, 1 mL/min, 254 nm)

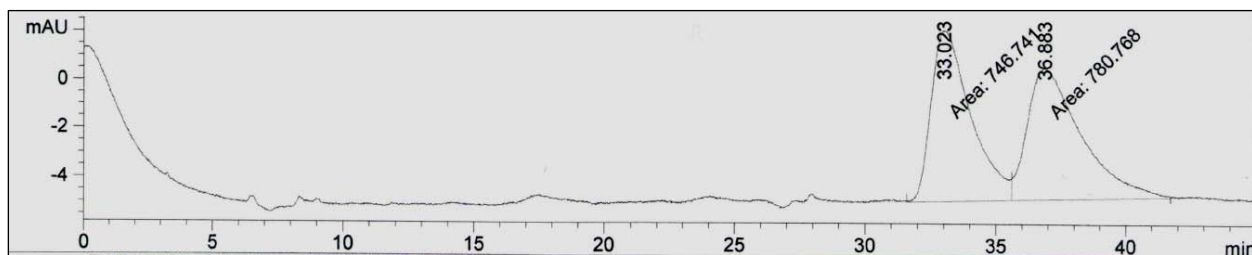

Enantiomeric excess of **14** (Chiracel IA column, 99.5:0.5 hexanes:isopropanol, 1 mL/min, 254 nm)

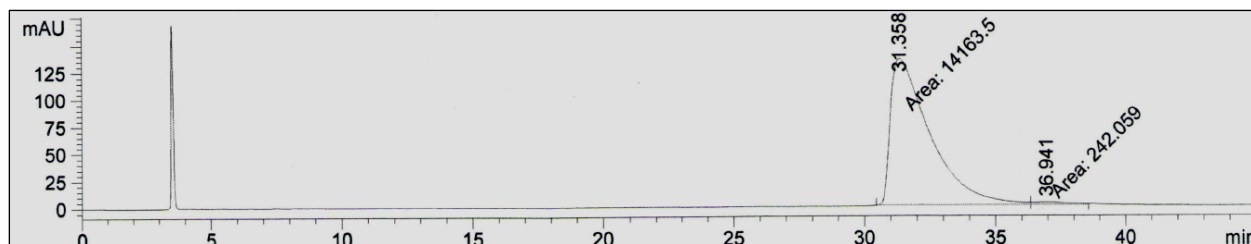

Signal 1: DAD1 A, Sig=254,4 Ref=450,80

| Peak # | RetTime [min] | Type | Width [min] | Area [mAU*s] | Height [mAU] | Area %  |
|--------|---------------|------|-------------|--------------|--------------|---------|
| 1      | 31.358        | MF   | 1.7554      | 1.41635e4    | 134.47302    | 98.3197 |
| 2      | 36.941        | FM   | 1.6238      | 242.05911    | 2.48448      | 1.6803  |

Totals : 1.44056e4 136.95750

**<sup>1</sup>H NMR of 15 (400 MHz, CDCl<sub>3</sub>) (90% purity)**

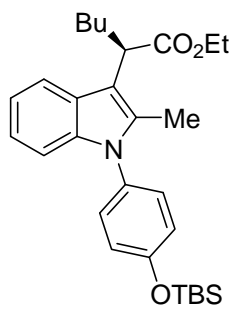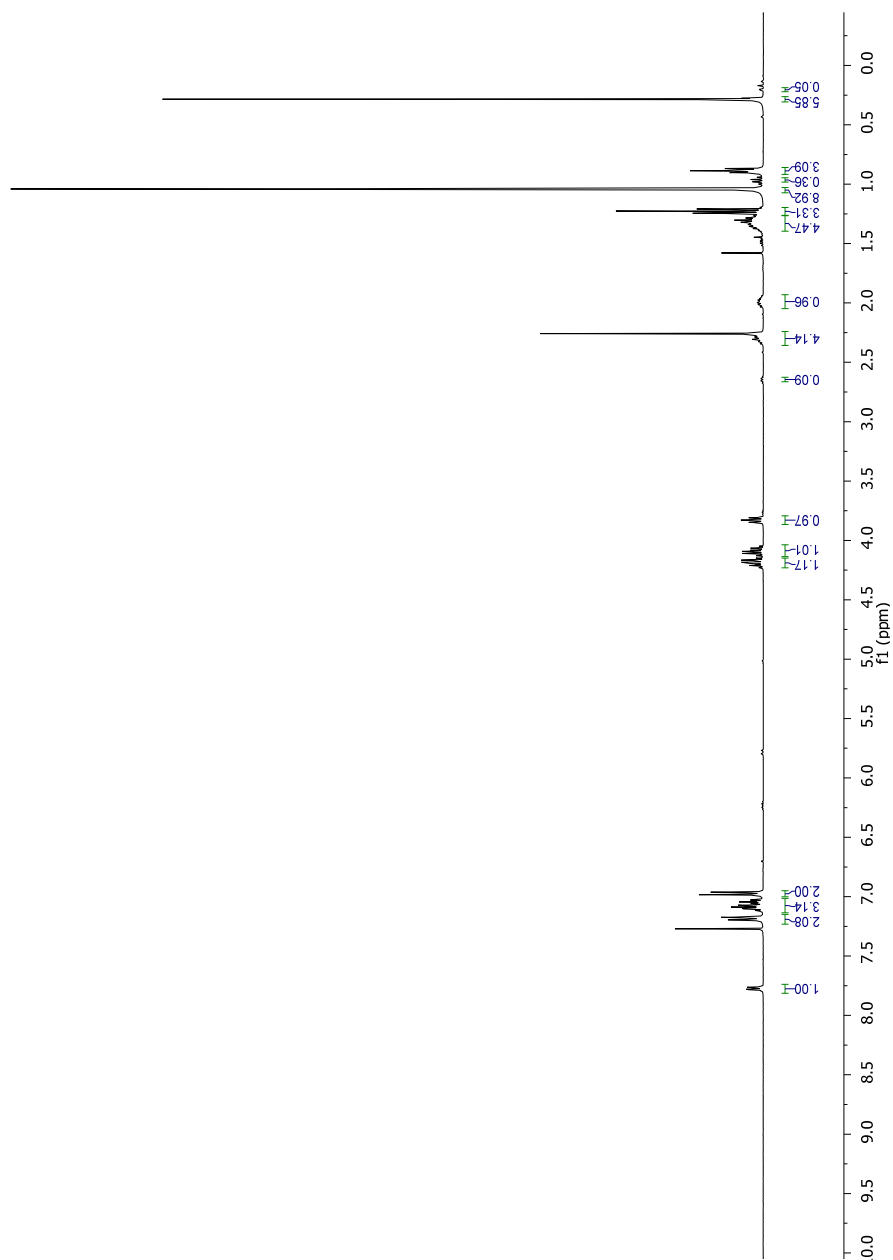

<sup>13</sup>C NMR of 15 (100 MHz, CDCl<sub>3</sub>) (90% purity)

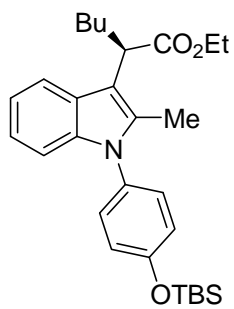

- 4.4
- 11.2
- 14.0
- 14.3
- 18.2
- 22.6
- 25.6
- 30.1
- 31.3
- 43.3
- 60.4
- 109.7
- 109.9
- 119.3
- 119.4
- 120.6
- 120.8
- 120.8
- 126.7
- 129.4
- 131.1
- 134.4
- 137.8
- 155.2
- 174.5

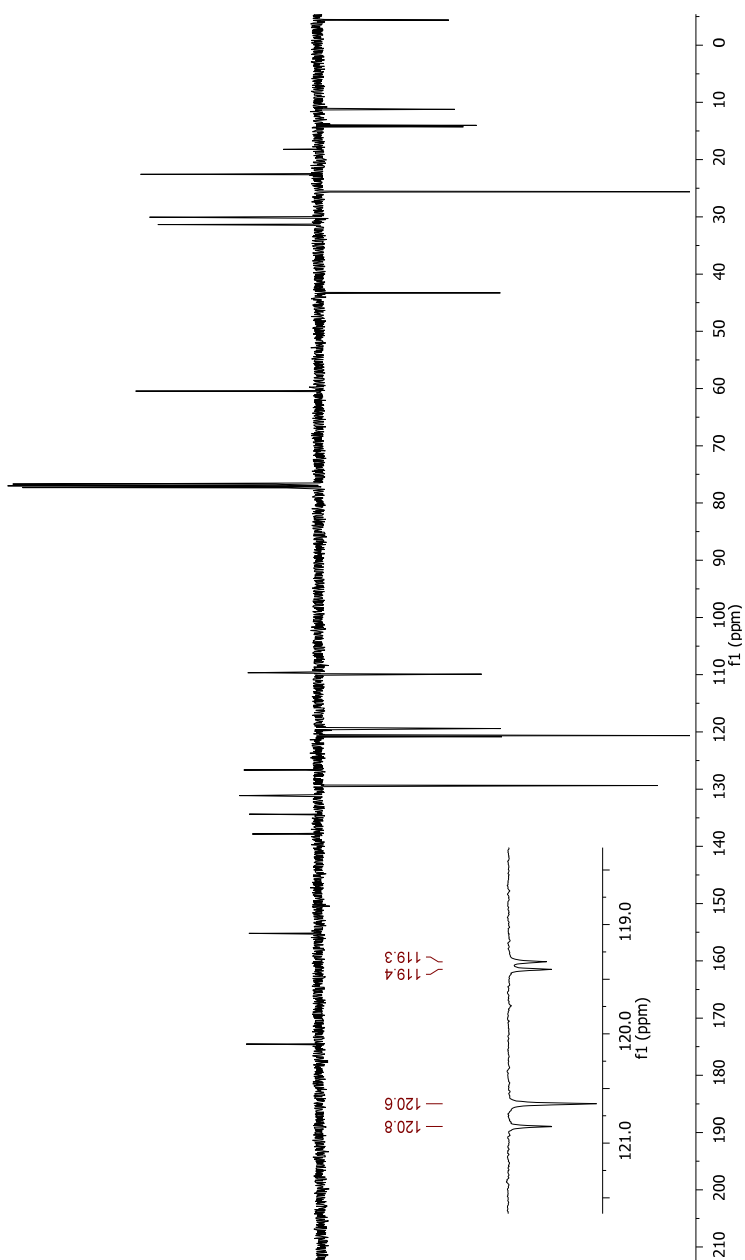

HPLC resolution of racemic **15** (Chiracel IB column, 99.9:0.1 hexanes:isopropanol, 1 mL/min, 220 nm)

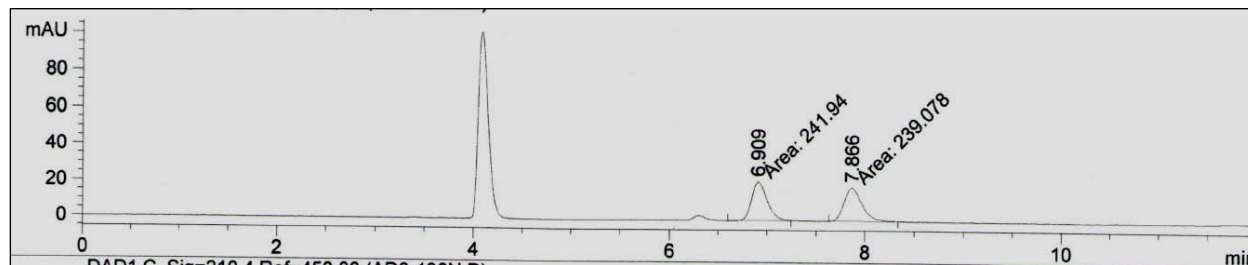

Enantiomeric excess of **15** (Chiracel IB column, 99.9:0.1 hexanes:isopropanol, 1 mL/min, 220 nm)

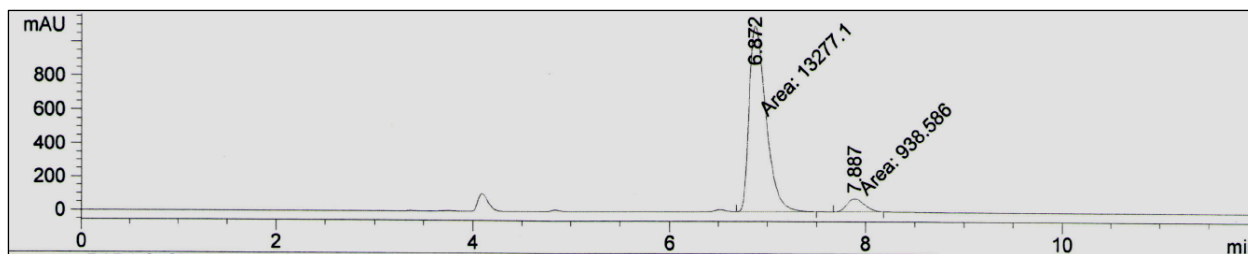

Signal 2: DAD1 B, Sig=220,4 Ref=450,80

| Peak #   | RetTime [min] | Type | Width [min] | Area [mAU*s] | Height [mAU] | Area %  |
|----------|---------------|------|-------------|--------------|--------------|---------|
| 1        | 6.872         | MM   | 0.1996      | 1.32771e4    | 1108.56372   | 93.3975 |
| 2        | 7.887         | MM   | 0.2029      | 938.58588    | 77.09678     | 6.6025  |
| Totals : |               |      |             | 1.42157e4    | 1185.66050   |         |



<sup>1</sup>H NMR of 16 (400 MHz, C<sub>6</sub>D<sub>6</sub>)

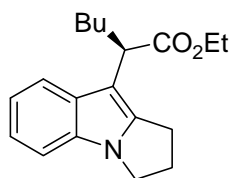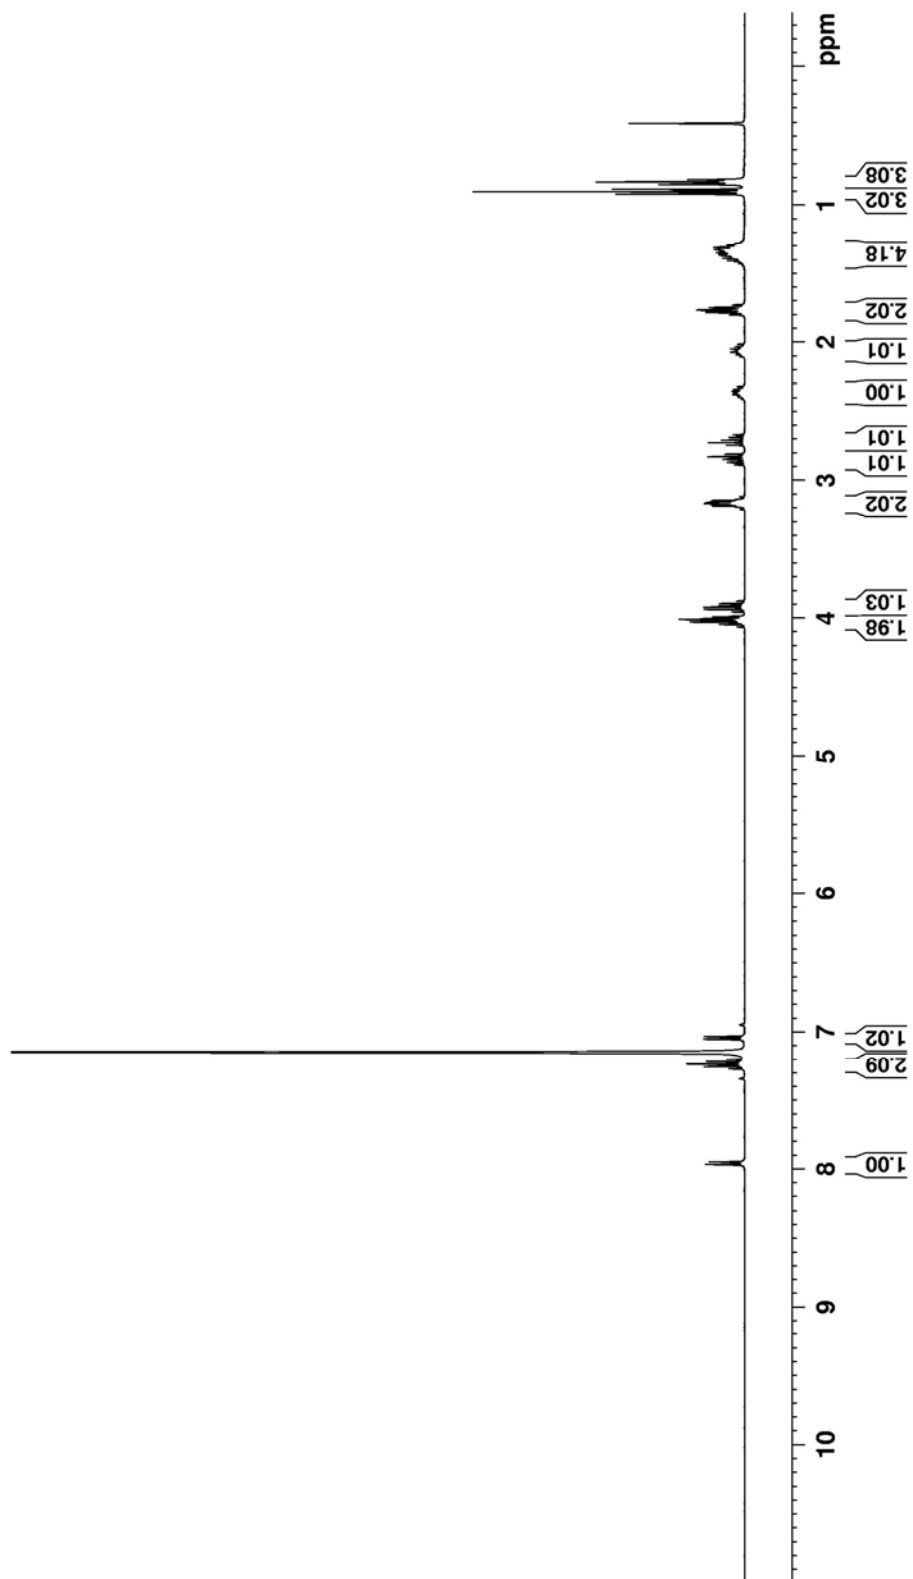

<sup>13</sup>C NMR spectrum of 16 (100 MHz, C<sub>6</sub>D<sub>6</sub>)

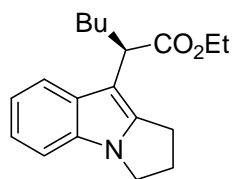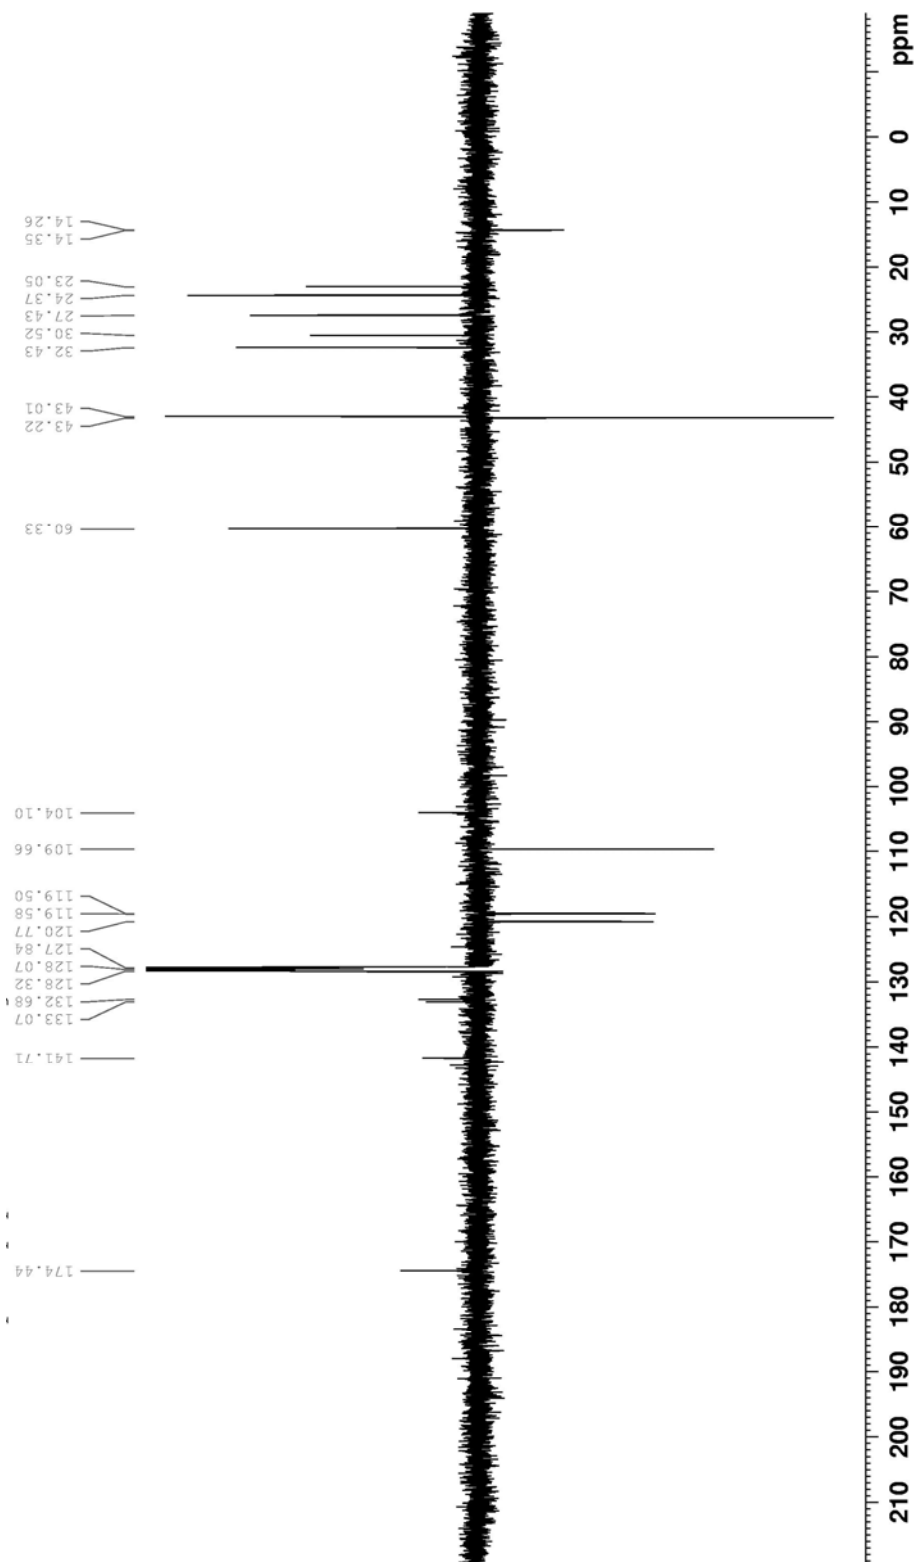

HPLC resolution of racemic **16** (Chiracel OD column, 99:1 hexanes:isopropanol, 1 mL/min, 275 nm)

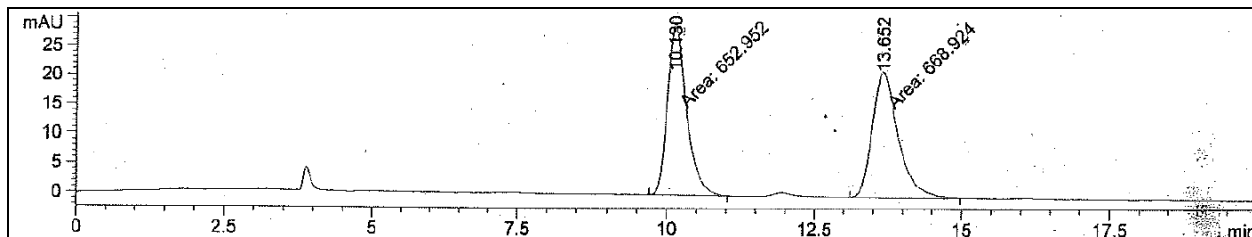

Enantiomeric excess of **16** (Chiracel OD column, 99:1 hexanes:isopropanol, 1 mL/min, 275 nm)

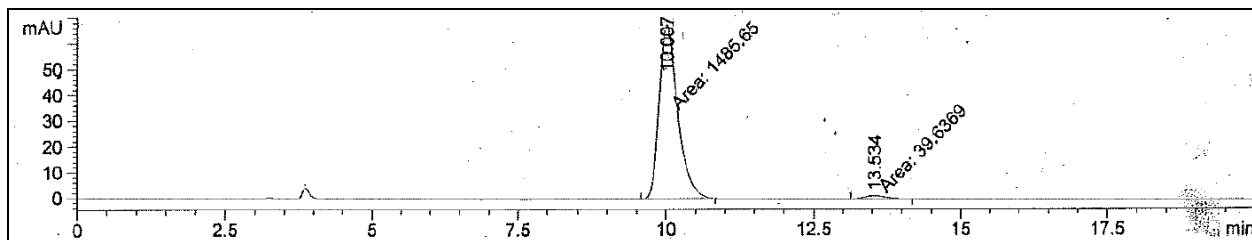

Signal 3: DAD1 C, Sig=275,4 Ref=450,80

| Peak #   | RetTime [min] | Type | Width [min] | Area [mAU*s] | Height [mAU] | Area %  |
|----------|---------------|------|-------------|--------------|--------------|---------|
| 1        | 10.007        | MM   | 0.3649      | 1485.65308   | 67.86433     | 97.4014 |
| 2        | 13.534        | MM   | 0.4672      | 39.63686     | 1.41397      | 2.5986  |
| Totals : |               |      |             | 1525.28994   | 69.27830     |         |

**<sup>1</sup>H NMR of 17 (400 MHz, C<sub>6</sub>D<sub>6</sub>)**

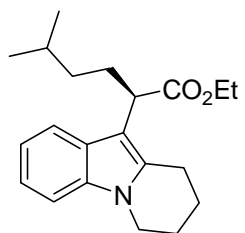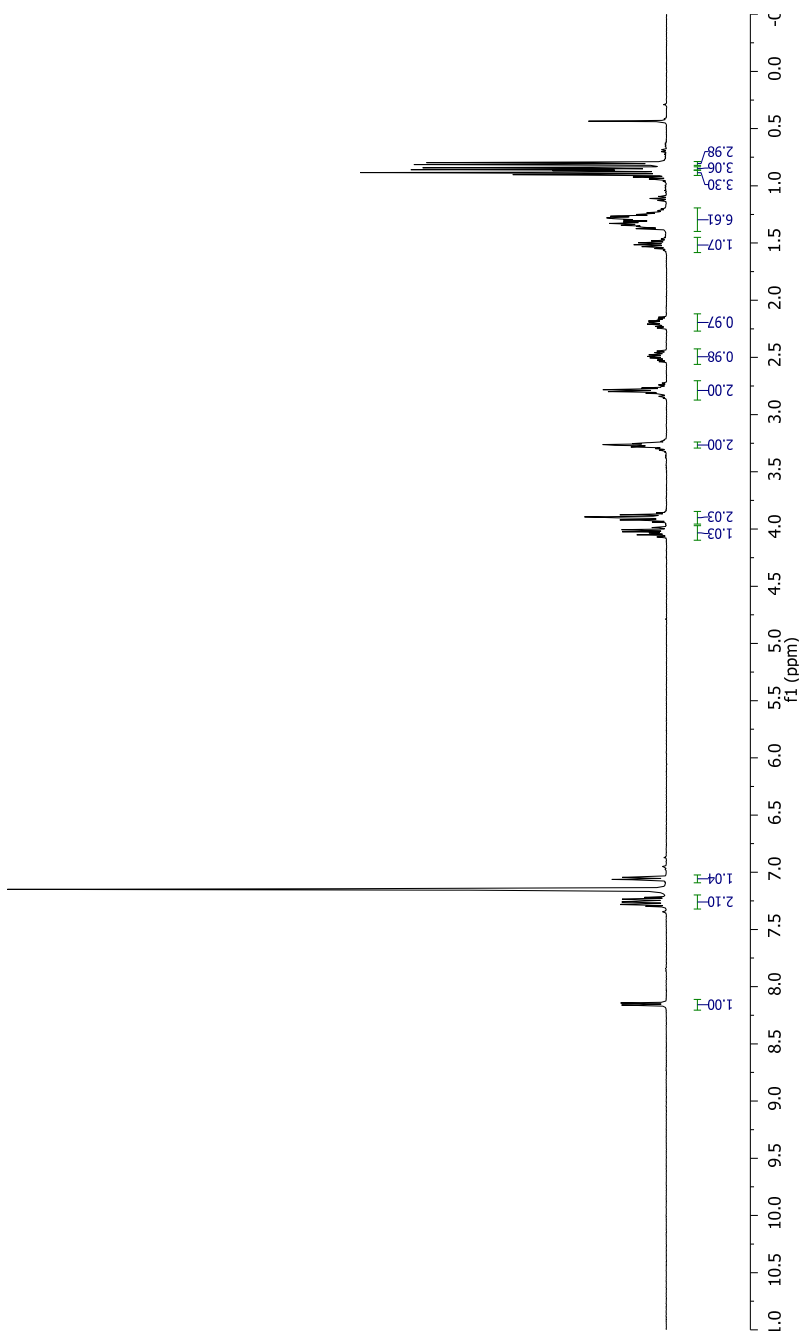

<sup>13</sup>C NMR spectrum of 17 (100 MHz, C<sub>6</sub>D<sub>6</sub>)

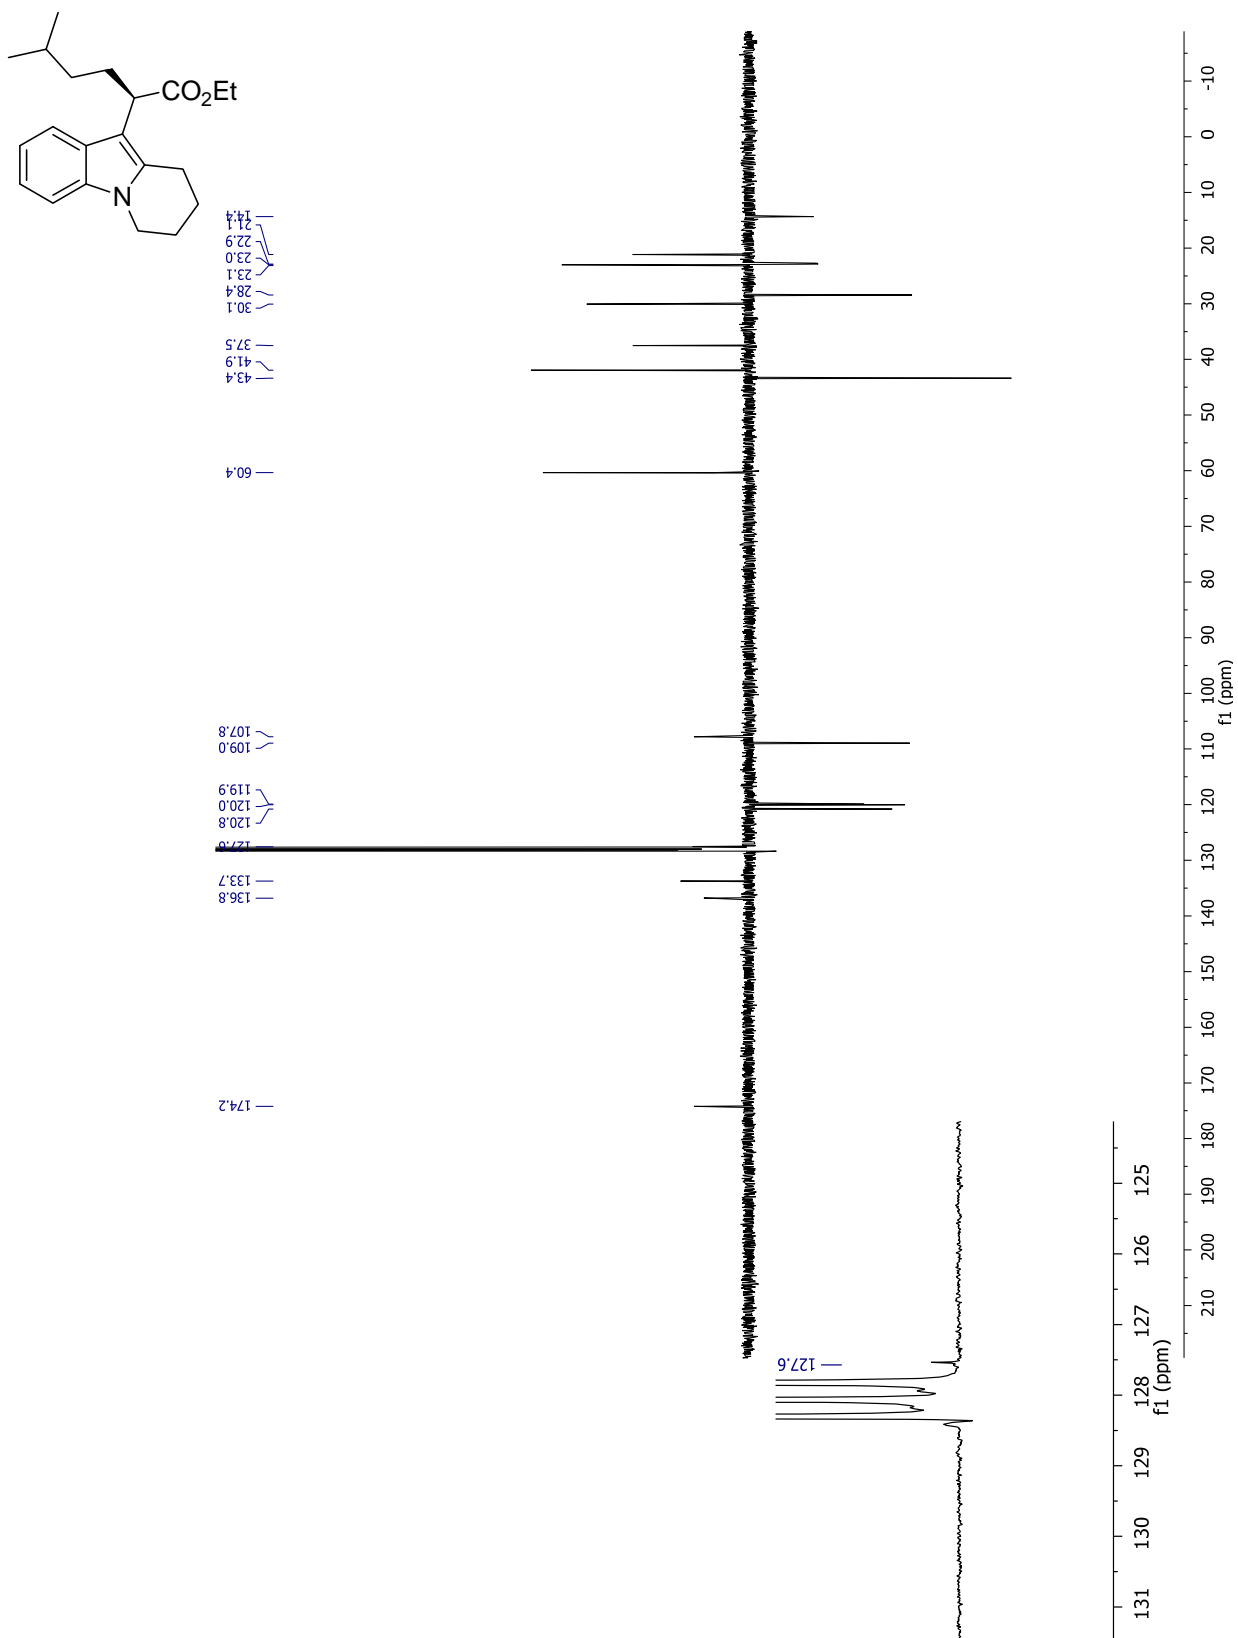

HPLC resolution of racemic **17** (Chiracel OD column, 99:1 hexanes:isopropanol, 1 mL/min, 220 nm)

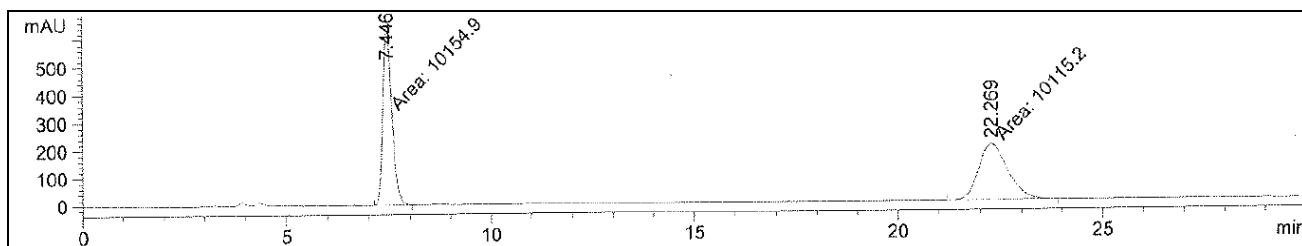

Enantiomeric excess of **17** (Chiracel OD column, 99:1 hexanes:isopropanol, 1 mL/min, 220 nm)

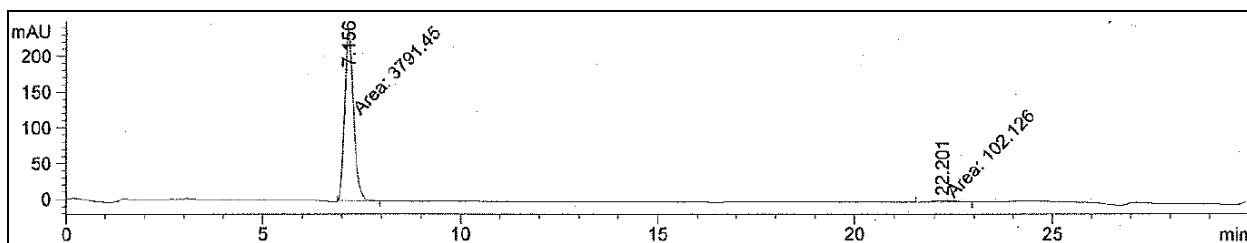

| Peak #   | RetTime [min] | Type | Width [min] | Area [mAU*s] | Height [mAU] | Area %  |
|----------|---------------|------|-------------|--------------|--------------|---------|
| 1        | 7.156         | MM   | 0.2638      | 3791.44629   | 239.56104    | 97.3771 |
| 2        | 22.201        | MM   | 0.7685      | 102.12646    | 2.21475      | 2.6229  |
| Totals : |               |      |             | 3893.57275   | 241.77578    |         |

**<sup>1</sup>H NMR of G (400 MHz, C<sub>6</sub>D<sub>6</sub>)**

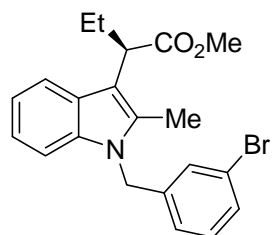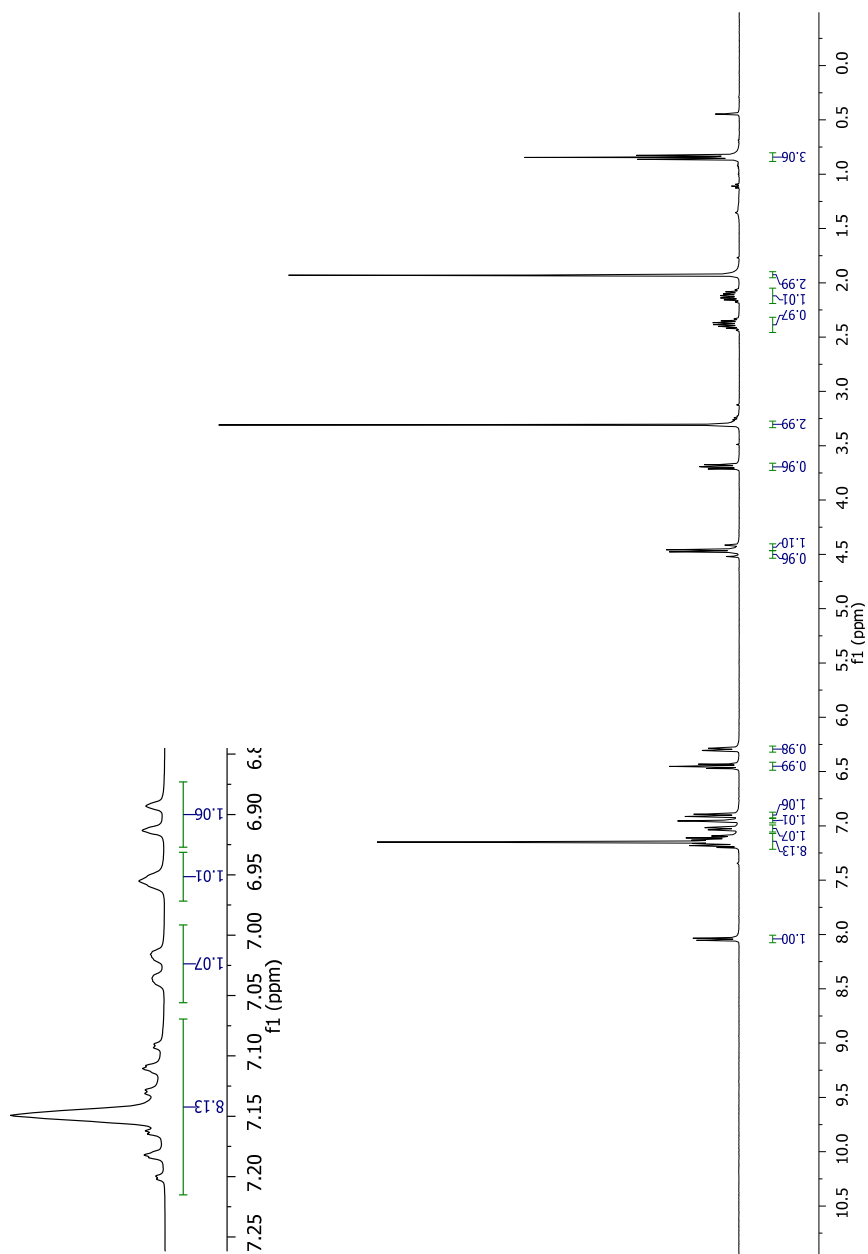

<sup>13</sup>C NMR spectrum of G (100 MHz, C<sub>6</sub>D<sub>6</sub>)

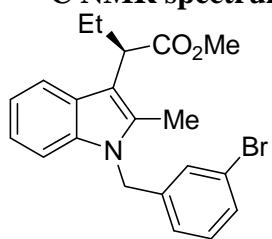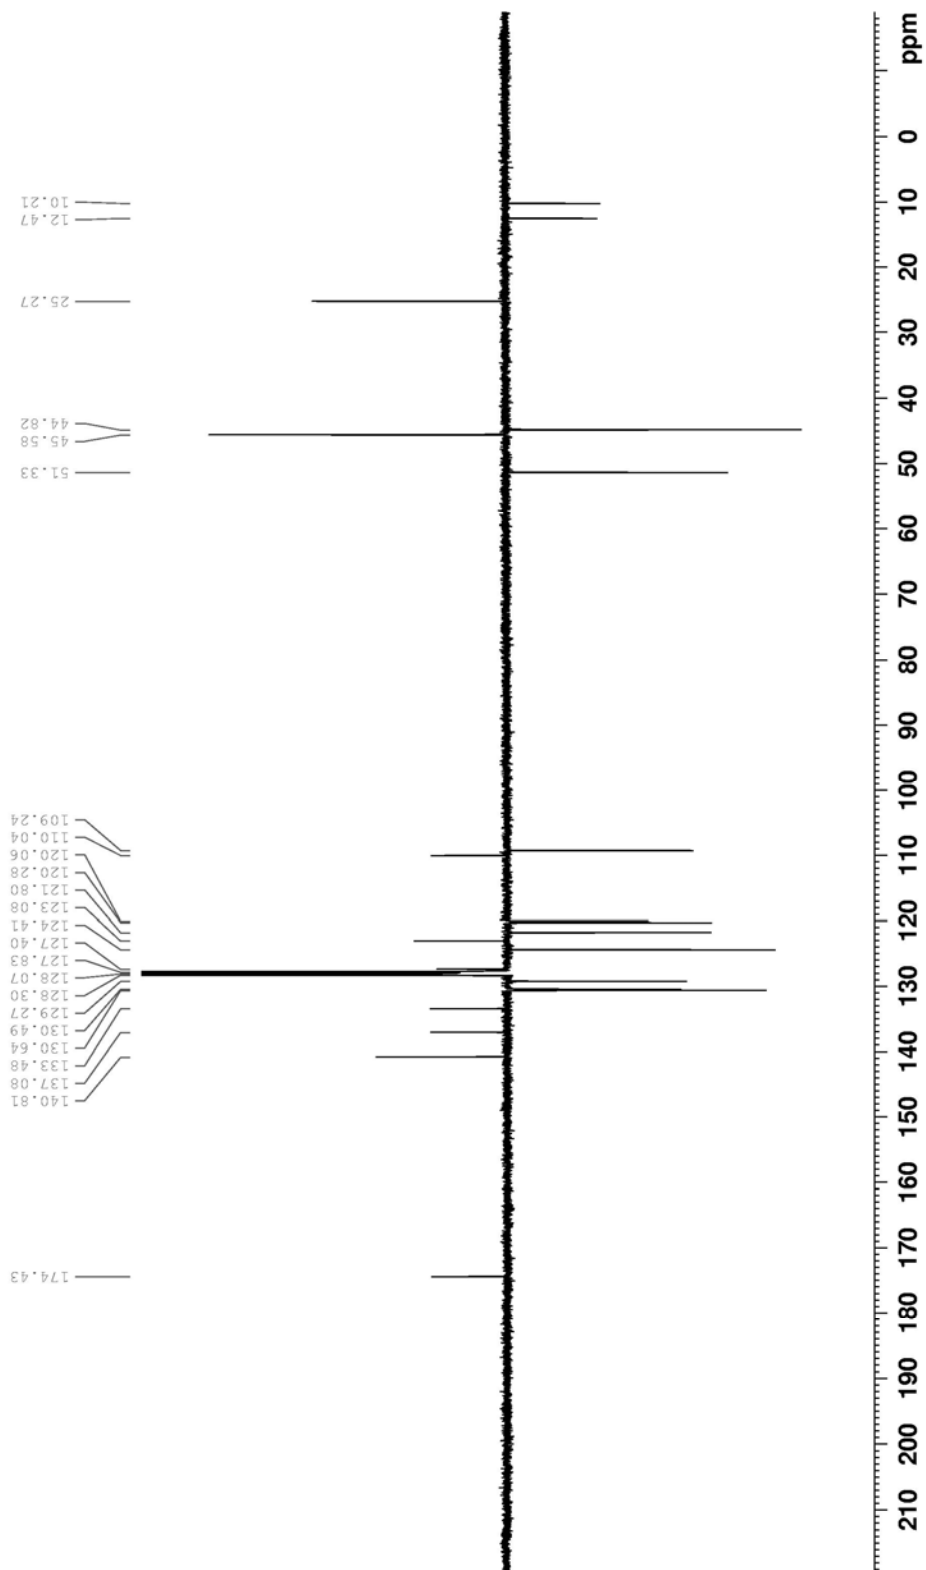



HPLC resolution of racemic **G** (Chiracel OD column, 99:1 hexanes:isopropanol – 97.5:2.5 hexanes isopropanol over 30 min, 1 mL/min, 220 nm)

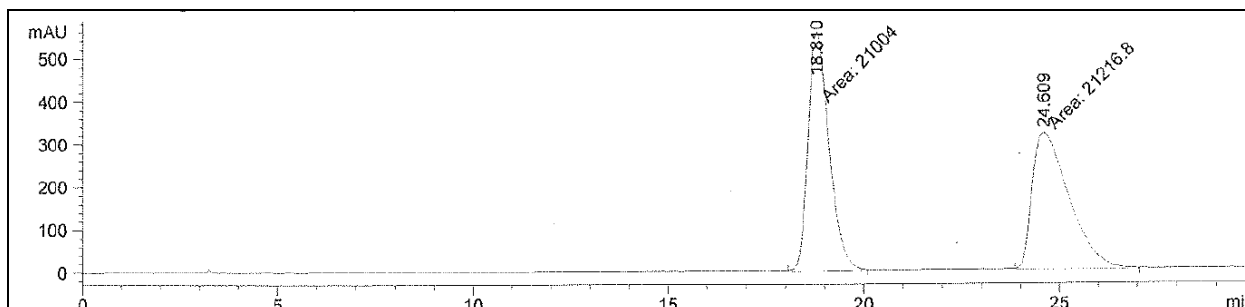

Enantiomeric excess of **G** (Chiracel OD column, 99:1 hexanes:isopropanol – 97.5:2.5 hexanes isopropanol over 30 min, 1 mL/min, 220 nm)

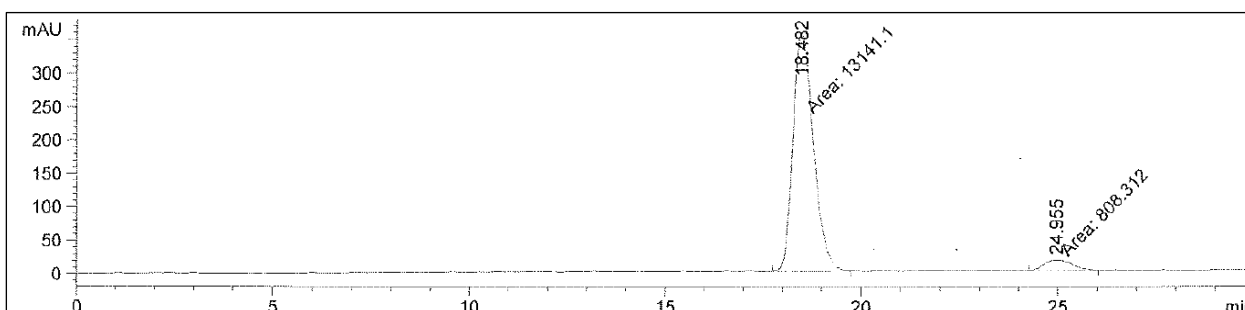

Signal 2: DAD1 B, Sig=220,4 Ref=450,80

| Peak #   | RetTime [min] | Type | Width [min] | Area [mAU*s] | Height [mAU] | Area %  |
|----------|---------------|------|-------------|--------------|--------------|---------|
| 1        | 18.482        | MM   | 0.6136      | 1.31411e4    | 356.95868    | 94.2054 |
| 2        | 24.955        | MM   | 0.8283      | 808.31226    | 16.26467     | 5.7946  |
| Totals : |               |      |             | 1.39495e4    | 373.22335    |         |

## Computational Details

Cartesian coordinates and total energies of the optimized structures:

Full g09 reference:

Gaussian 09, Revision A.02,

M. J. Frisch, G. W. Trucks, H. B. Schlegel, G. E. Scuseria,

M. A. Robb, J. R. Cheeseman, G. Scalmani, V. Barone, B. Mennucci,

G. A. Petersson, H. Nakatsuji, M. Caricato, X. Li, H. P. Hratchian,

A. F. Izmaylov, J. Bloino, G. Zheng, J. L. Sonnenberg, M. Hada,

M. Ehara, K. Toyota, R. Fukuda, J. Hasegawa, M. Ishida, T. Nakajima,

Y. Honda, O. Kitao, H. Nakai, T. Vreven, J. A. Montgomery, Jr.,

J. E. Peralta, F. Ogliaro, M. Bearpark, J. J. Heyd, E. Brothers,

K. N. Kudin, V. N. Staroverov, R. Kobayashi, J. Normand,

K. Raghavachari, A. Rendell, J. C. Burant, S. S. Iyengar, J. Tomasi,

M. Cossi, N. Rega, J. M. Millam, M. Klene, J. E. Knox, J. B. Cross,

V. Bakken, C. Adamo, J. Jaramillo, R. Gomperts, R. E. Stratmann,

O. Yazyev, A. J. Austin, R. Cammi, C. Pomelli, J. W. Ochterski,

R. L. Martin, K. Morokuma, V. G. Zakrzewski, G. A. Voth,

P. Salvador, J. J. Dannenberg, S. Dapprich, A. D. Daniels,

O. Farkas, J. B. Foresman, J. V. Ortiz, J. Cioslowski,

and D. J. Fox, Gaussian, Inc., Wallingford CT, 2009.

Cartesian coordinates of the optimized pre-reaction complex (B3LYP/gen [lanl2dz&6-311+G(d,p)])

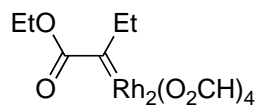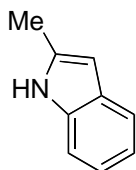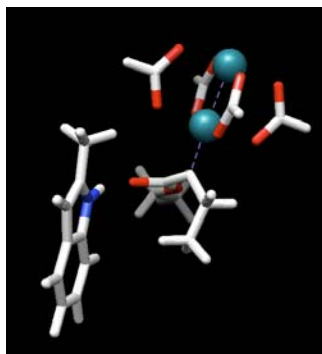

Charge = 0 Multiplicity = 1

E+ZPVE= -1764.074547 a.u.

O 1.847172,1.465463,-1.056003  
C 0.394803,1.023919,0.717757  
C 1.033916,1.915944,-0.272513  
O 0.621732,3.171333,-0.204607  
C 1.109676,4.092146,-1.231751  
C 0.980736,0.892099,2.056104  
C 2.398595,1.405776,2.322548  
Rh -1.312758,0.110556,0.265426  
C 0.467766,5.4369,-0.971484  
O -1.894659,1.600685,-1.075055  
C -3.039257,1.51399,-1.618778  
O -3.911794,0.629533,-1.459428  
Rh -3.51144,-0.967288,-0.171183  
O -4.261138,0.136123,1.438955  
C -3.485244,0.893674,2.062651  
O -2.251171,1.107585,1.843292  
H 0.835411,3.681417,-2.204578  
H 2.198475,4.130962,-1.165987  
H 0.232038,1.464958,2.646234  
H 0.822765,-0.133267,2.411581  
H 2.627918,1.315785,3.386279

H 2.508944,2.456796,2.045162  
H 3.139754,0.824033,1.77201  
H -0.620178,5.366095,-1.024588  
H 0.805316,6.151371,-1.726823  
H 0.74522,5.82184,0.012033  
H -3.283393,2.327187,-2.3163  
H -3.907522,1.451776,2.909374  
C 5.106635,-0.448159,-0.336061  
C 5.640666,0.804813,-0.026629  
C 6.885209,0.842088,0.592304  
C 7.583317,-0.342678,0.893139  
C 7.05164,-1.5868,0.580369  
C 5.795801,-1.657557,-0.042649  
N 3.913581,-0.791071,-0.939791  
C 3.821743,-2.169636,-1.034507  
C 4.955519,-2.728902,-0.498499  
C 2.63427,-2.815853,-1.668766  
H 5.107985,1.717456,-0.270348  
H 7.328376,1.799716,0.842052  
H 8.553321,-0.278547,1.373533  
H 7.60064,-2.492959,0.813785  
H 3.181321,-0.139073,-1.19128  
H 5.164596,-3.786548,-0.443849  
H 2.672939,-3.896434,-1.523932  
H 2.605057,-2.620487,-2.746841  
H 1.698409,-2.440437,-1.244609  
O -0.9089,-1.476854,1.556106  
C -1.786657,-2.386025,1.698287  
O -2.910488,-2.467893,1.152932  
H -1.509716,-3.193912,2.389027

O -0.58966,-1.008324,-1.339032

C -1.383869,-1.774489,-1.967038

O -2.600214,-1.980582,-1.747818

H -0.932466,-2.321332,-2.805971

Cartesian coordinates of the optimized transition state (**D**) for the reaction between 2-methylindole and  $\text{Et}(\text{EtO}_2\text{C})\text{C}=\text{Rh}_2(\text{O}_2\text{CH})_4$  shown in Fig. 1(b)

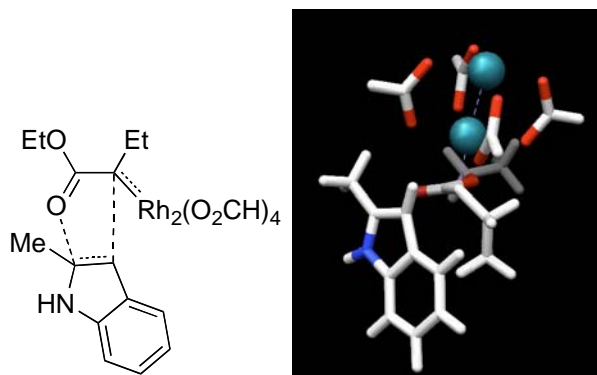

$E+\text{ZPVE}=-1764.060456$  a.u. Im. Freq, $\nu_i=141.6i$   $\text{cm}^{-1}$

|    |                                           |
|----|-------------------------------------------|
| O  | -2.7871287772,2.0465441828,0.7079838337   |
| C  | -1.4507278179,0.3645431501,-0.4738207676  |
| C  | -2.1648596072,1.6669272194,-0.2562805657  |
| O  | -1.9624020064,2.4190195645,-1.3565717636  |
| C  | -2.3837166849,3.8058474178,-1.2837707111  |
| C  | -1.9158084687,-0.4366599175,-1.640123864  |
| C  | -3.3909224768,-0.3843732866,-2.0575762985 |
| Rh | 0.6167813627,0.3961521369,-0.170738224    |
| C  | -2.028024499,4.457367882,-2.6038818179    |
| O  | 0.7000662369,2.4714910566,0.0824335824    |
| C  | 1.8344029077,3.0216322915,0.2151823551    |
| O  | 2.969692188,2.4876822723,0.2078585504     |
| Rh | 3.1114281097,0.41736582,-0.0389025433     |
| O  | 3.1361560153,0.6645006859,-2.110590325    |
| C  | 2.0407943202,0.7005422113,-2.7176900809   |
| O  | 0.870846014,0.6140492835,-2.2349909571    |
| H  | -1.8690699282,4.2733892991,-0.442154138   |
| H  | -3.457779758,3.8343553739,-1.0863271493   |
| H  | -1.2963293725,-0.0074346494,-2.4475859342 |
| H  | -1.5512237908,-1.4617173349,-1.5489804319 |

H -3.5374440446,-0.9891371314,-2.9563225073  
H -3.7001558718,0.636479556,-2.2912211518  
H -4.0498695453,-0.7781596413,-1.2839044575  
H -0.9530262356,4.4042639376,-2.7866338205  
H -2.3245943136,5.5097541596,-2.5845088795  
H -2.5450568378,3.9713850461,-3.4344398042  
H 1.8098459612,4.1120886816,0.3550649487  
H 2.0860304555,0.8221416022,-3.8091748102  
C -4.3217627138,-1.7578808924,1.3085636402  
C -5.4781102727,-2.4480339828,0.9650259857  
C -5.3345737015,-3.5559555888,0.1302465252  
C -4.0718820618,-3.9535888042,-0.3337944569  
C -2.9228961696,-3.2422160196,0.0037708553  
C -3.0432797359,-2.1149509576,0.8219985927  
N -4.1390407188,-0.6656478626,2.1564333772  
C -2.8238550778,-0.3243248163,2.2253361978  
C -2.0996010959,-1.1487551876,1.3496087545  
C -2.3423040112,0.6749693247,3.2169715565  
H -6.4518772676,-2.1522664611,1.3392016146  
H -6.2121155466,-4.1252492147,-0.1531574146  
H -3.9917158224,-4.8314662818,-0.9646245022  
H -1.9507680588,-3.5578490993,-0.356389415  
H -4.8783268631,-0.1554060573,2.6146958523  
H -1.0361875085,-1.2885318756,1.4210567814  
H -1.3384806542,1.0017179181,2.9595666082  
H -2.3144988892,0.2134936262,4.2118674059  
H -2.9989030836,1.5454695894,3.2547367078  
O 0.7393913767,-1.6788145727,-0.3800991245  
C 1.8906991395,-2.2164924242,-0.3949475886  
O 3.0089122491,-1.6629027284,-0.2901072706

H 1.892995276,-3.3093321166,-0.5154432905  
O 0.649082132,0.1828974267,1.9160683154  
C 1.7661524593,0.1236885945,2.5177437638  
O 2.9162688399,0.1764163095,2.0265515209  
H 1.703223291,0.0115896789,3.6097697776



Another transition state (D\*), which does not possess oxocarbenium character for the reaction between 2-methylindole and  $\text{Et}(\text{EtO}_2\text{C})\text{C}=\text{Rh}_2(\text{O}_2\text{CH})_4$ :

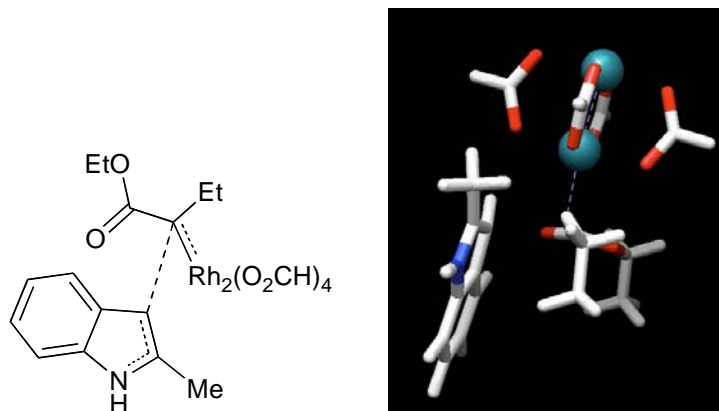

E+ZPVE= -1764.057585 a.u. Im. Freq, $\nu_i$ =128.7i  $\text{cm}^{-1}$

C 2.8386494867,3.083775627,3.0901562796  
 C 1.9968734608,3.8211310199,3.9378090645  
 O 2.0379347154,0.2893013806,0.0339617807  
 N -0.8224956905,1.3958255282,3.9199835821  
 C -0.7733695089,0.2197453933,3.2333265418  
 C 0.3447601779,2.1301094085,3.724114905  
 C 1.1578388145,1.3816842952,2.8420979381  
 C -0.3917108392,0.2346318728,0.1460218273  
 C 0.9562111993,0.5665588183,-0.4220975615  
 O 0.7664699752,1.1456505114,-1.629611622  
 C 1.9263801766,1.2710664924,-2.4952540797  
 C -1.456151137,1.2730146145,0.141217131  
 C -1.1085277281,2.7394843325,0.4226533182  
 Rh -0.9837797637,-1.6890251291,-0.3958592384  
 C 2.5925105431,2.6263679011,-2.3286360304  
 C 0.412653591,0.1808601741,2.4873503997  
 C 0.7304935606,3.3497985871,4.271102167  
 C 2.4350103124,1.8714103517,2.5392159923  
 H 1.5236959404,1.1431802369,-3.5005087454

H 2.613580001,0.4553529017,-2.2721743192  
H -1.8217707613,1.1805674825,-0.8981352323  
H -2.2991765654,0.9322544549,0.7472920647  
H -2.0023005128,3.3566607155,0.2948280767  
H -0.347773271,3.1076079217,-0.2670785417  
H -0.7430326896,2.883377879,1.4389478523  
H 1.8869220417,3.4369253048,-2.5265835589  
H 3.4207156481,2.7156992748,-3.0380814176  
H 2.9925285209,2.7441694137,-1.3200530635  
H 0.8281749957,-0.728550978,2.0846425264  
O 0.8112430993,-2.0649398297,-1.3939516445  
C 0.9564356177,-3.1576262034,-2.0184508443  
O 0.1380733726,-4.1003050137,-2.1433451262  
H 1.9306535186,-3.2857804565,-2.5110400379  
Rh -1.7402084731,-3.9106201265,-1.2544289377  
O -2.434872506,-2.9138315774,-2.9523909946  
C -2.3045425571,-1.668911625,-3.0102794747  
O -1.7769593687,-0.8920262314,-2.1577823723  
H -2.6935874057,-1.1741637239,-3.9113889037  
O -2.8861321519,-1.5128550935,0.4752410947  
C -3.7212555307,-2.4552147585,0.3107969229  
O -3.566203323,-3.5346207726,-0.304454146  
H -4.7050267138,-2.2940477737,0.7754712514  
O -0.2676269683,-2.7232549665,1.2771986387  
C -0.4113587609,-3.9840289662,1.3323353132  
O -0.9732000578,-4.7375611611,0.5056413622  
H 0.0100680658,-4.4629592938,2.2277518345  
H 3.0864928569,1.3146402118,1.8805952633  
H 3.8261894125,3.4685748094,2.8620270975  
H 2.3400838705,4.7640494794,4.3474446893

H 0.0816710745,3.9049997838,4.9394884567  
C -1.8608948547,-0.784184481,3.3852333969  
H -2.6749103309,-0.5986185009,2.6791611175  
H -1.4786379194,-1.7796127304,3.1698244787  
H -2.2661462235,-0.7637930971,4.400995106  
H -1.586467917,1.6717981313,4.5174828516

Cartesian coordinates of optimized structure of ylide (**E**) for the reaction between 2-methylindole and  $\text{Et}(\text{EtO}_2\text{C})\text{C}=\text{Rh}_2(\text{O}_2\text{CH})_4$  shown in Fig. 1(c)

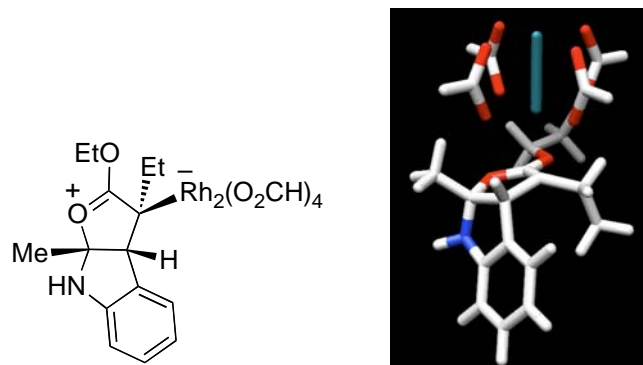

$E+ZPVE = -1764.100099$  a.u.

O -1.9632097101,1.6134372422,1.2279263099  
 C -1.482849425,0.2719964541,-0.6008297544  
 C -1.4924157701,1.5341690406,-0.0024886249  
 O -1.0968778011,2.6410459868,-0.5787589628  
 C -0.9730451155,3.8545592593,0.2220846426  
 C -1.5521085366,0.1358093554,-2.1155292285  
 C -2.7806854422,0.7970264409,-2.7687284543  
 Rh 0.8564960226,-0.1281889394,-0.1402207235  
 C -0.4569323801,4.9406785924,-0.6960707531  
 O 1.100316766,1.323895947,1.3552696845  
 C 2.2416471535,1.4553431488,1.8903851328  
 O 3.2943955556,0.8205512644,1.640913868  
 Rh 3.2545520951,-0.6528178686,0.1618719362  
 O 3.6583952804,0.7933205846,-1.2829284731  
 C 2.6923874824,1.3935066942,-1.8182498215  
 O 1.4569741662,1.2556505735,-1.5831691908  
 H -0.285441329,3.6426484632,1.0412460677  
 H -1.9547388723,4.0963845807,0.6339949694

H -0.6517600224,0.5736496337,-2.5488870859  
H -1.5149548394,-0.9255079039,-2.3677830432  
H -2.760467435,0.631148209,-3.850346852  
H -2.777766407,1.8771960452,-2.6015821164  
H -3.7201223055,0.3945113165,-2.3868065214  
H 0.5137401423,4.6671319627,-1.11331448  
H -0.3430285202,5.8692692668,-0.1304576084  
H -1.1516971979,5.1224540514,-1.5187301001  
H 2.312080326,2.2245243416,2.6729901597  
H 2.9477682958,2.1342045645,-2.5890737677  
C -4.6133165636,-0.4308918364,0.7254508345  
C -5.9738510652,-0.6768949075,0.5709876513  
C -6.3661198681,-1.6152466072,-0.3878222067  
C -5.4228617054,-2.2892207849,-1.1629492187  
C -4.0578182661,-2.0271124089,-0.9942656974  
C -3.6571784522,-1.0855446767,-0.0588944566  
N -3.9959734591,0.4434821246,1.6321568973  
C -2.5674179909,0.2904322664,1.598920063  
C -2.2708582104,-0.6371837401,0.3640325406  
C -1.9614240258,-0.0810777178,2.9370033716  
H -6.7102243525,-0.1613897408,1.177553418  
H -7.4214488359,-1.8243081442,-0.5228958134  
H -5.7462423112,-3.021521835,-1.8930887885  
H -3.3236009033,-2.5615360258,-1.5868006617  
H -4.4308452015,0.6065062151,2.5284505088  
H -1.6690493049,-1.4952636859,0.664770089  
H -0.8761327238,-0.1151630107,2.8680868908  
H -2.3271824034,-1.0647500011,3.2408752299  
H -2.247617982,0.6537567759,3.6953869544  
O 0.8337765655,-1.6406724676,-1.5842397479

C 1.9091990346,-2.2534051936,-1.8448902743  
O 3.0451367757,-2.086813151,-1.331577859  
H 1.8361182047,-3.0301354029,-2.6189792283  
O 0.4851330478,-1.5870973298,1.3261732336  
C 1.4650553912,-2.2140302226,1.829608045  
O 2.6869770373,-2.0680577058,1.5844755529  
H 1.206180392,-2.9789920933,2.5752664633

Calculations on the stepwise conversion of **E** to **F**. These computations suggest that an intramolecular 1,2-hydride shift for the conversion of **E** to **F** is not plausible ( $\Delta E(\text{ZPE})^\ddagger = 30.2$  kcal/mol) at  $-78$  °C.

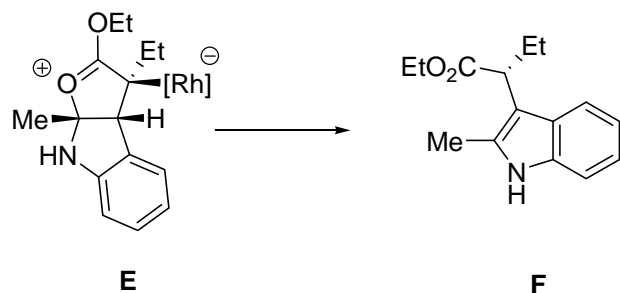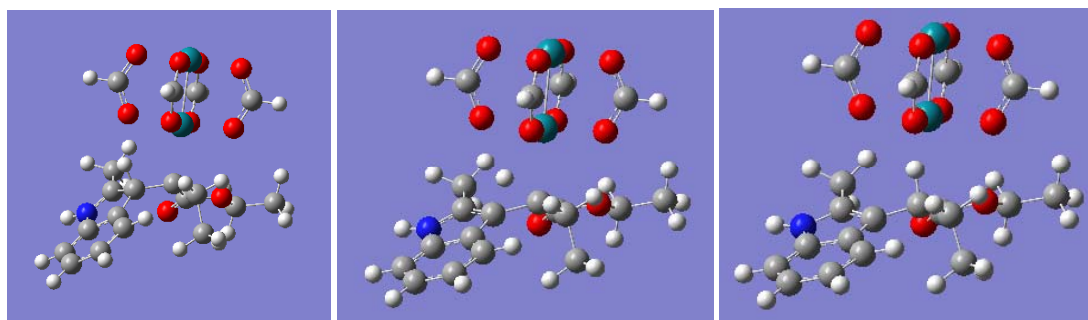

IRCreverse (Reactant)

TS

IRCforward (ending point)

Reaction barrier (kcal/mol):

$$\Delta E^\ddagger = 34.3; \Delta(E+\text{ZPVE})^\ddagger = 30.2; \Delta H^\ddagger = 30.7; \Delta G^\ddagger = 29.1$$

This reactant complex is 25.7 kcal/mol lower in energy than isolated carbene, indole and Rh-catalyst. The TS itself is higher in energy by 8.7 kcal/mol with respect to isolated reactants

### Reactant

File: 1SModIndProd\_Gen.log

E=-1764.5149405 a.u.

Zero-point correction= 0.414842 (Hartree/Particle)

Thermal correction to Energy= 0.447697

Thermal correction to Enthalpy= 0.448641

Thermal correction to Gibbs Free Energy= 0.352047

Sum of electronic and zero-point Energies= -1764.100099

Sum of electronic and thermal Energies= -1764.067243  
Sum of electronic and thermal Enthalpies= -1764.066299  
Sum of electronic and thermal Free Energies= -1764.162894  
O,0,-1.9632097101,1.6134372422,1.2279263099  
C,0,-1.482849425,0.2719964541,-0.6008297544  
C,0,-1.4924157701,1.5341690406,-0.0024886249  
O,0,-1.0968778011,2.6410459868,-0.5787589628  
C,0,-0.9730451155,3.8545592593,0.2220846426  
C,0,-1.5521085366,0.1358093554,-2.1155292285  
C,0,-2.7806854422,0.7970264409,-2.7687284543  
Rh,0,0.8564960226,-0.1281889394,-0.1402207235  
C,0,-0.4569323801,4.9406785924,-0.6960707531  
O,0,1.100316766,1.323895947,1.3552696845  
C,0,2.2416471535,1.4553431488,1.8903851328  
O,0,3.2943955556,0.8205512644,1.640913868  
Rh,0,3.2545520951,-0.6528178686,0.1618719362  
O,0,3.6583952804,0.7933205846,-1.2829284731  
C,0,2.6923874824,1.3935066942,-1.8182498215  
O,0,1.4569741662,1.2556505735,-1.5831691908  
H,0,-0.285441329,3.6426484632,1.0412460677  
H,0,-1.9547388723,4.0963845807,0.6339949694  
H,0,-0.6517600224,0.5736496337,-2.5488870859  
H,0,-1.5149548394,-0.9255079039,-2.3677830432  
H,0,-2.760467435,0.631148209,-3.850346852  
H,0,-2.777766407,1.8771960452,-2.6015821164  
H,0,-3.7201223055,0.3945113165,-2.3868065214  
H,0,0.5137401423,4.6671319627,-1.11331448  
H,0,-0.3430285202,5.8692692668,-0.1304576084



H,0,-1.1516971979,5.1224540514,-1.5187301001  
H,0,2.312080326,2.2245243416,2.6729901597  
H,0,2.9477682958,2.1342045645,-2.5890737677  
C,0,-4.6133165636,-0.4308918364,0.7254508345  
C,0,-5.9738510652,-0.6768949075,0.5709876513  
C,0,-6.3661198681,-1.6152466072,-0.3878222067  
C,0,-5.4228617054,-2.2892207849,-1.1629492187  
C,0,-4.0578182661,-2.0271124089,-0.9942656974  
C,0,-3.6571784522,-1.0855446767,-0.0588944566  
N,0,-3.9959734591,0.4434821246,1.6321568973  
C,0,-2.5674179909,0.2904322664,1.598920063  
C,0,-2.2708582104,-0.6371837401,0.3640325406  
C,0,-1.9614240258,-0.0810777178,2.9370033716  
H,0,-6.7102243525,-0.1613897408,1.177553418  
H,0,-7.4214488359,-1.8243081442,-0.5228958134  
H,0,-5.7462423112,-3.021521835,-1.8930887885  
H,0,-3.3236009033,-2.5615360258,-1.5868006617  
H,0,-4.4308452015,0.6065062151,2.5284505088  
H,0,-1.6690493049,-1.4952636859,0.664770089  
H,0,-0.8761327238,-0.1151630107,2.8680868908  
H,0,-2.3271824034,-1.0647500011,3.2408752299  
H,0,-2.247617982,0.6537567759,3.6953869544  
O,0,0.8337765655,-1.6406724676,-1.5842397479  
C,0,1.9091990346,-2.2534051936,-1.8448902743  
O,0,3.0451367757,-2.086813151,-1.331577859  
H,0,1.8361182047,-3.0301354029,-2.6189792283  
O,0,0.4851330478,-1.5870973298,1.3261732336  
C,0,1.4650553912,-2.2140302226,1.829608045

O,0,2.6869770373,-2.0680577058,1.5844755529

H,0,1.206180392,-2.9789920933,2.5752664633

**TS** E= -1764.4602321 a.u. Im. Freq=1261.3346i cm<sup>-1</sup>

File: 1SIndHmigTS\_Gen.log

Zero-point correction= 0.408258 (Hartree/Particle)

Thermal correction to Energy= 0.441852

Thermal correction to Enthalpy= 0.442797

Thermal correction to Gibbs Free Energy= 0.343763

Sum of electronic and zero-point Energies= -1764.051974

Sum of electronic and thermal Energies= -1764.018380

Sum of electronic and thermal Enthalpies= -1764.017435

Sum of electronic and thermal Free Energies= -1764.116469

O,0,-1.7846672064,2.643169457,1.5131562955

C,0,-1.4304563345,1.0598197515,-0.2810432747

C,0,-1.2286722063,2.3353403898,0.4779471498

O,0,-0.3798261584,3.1594797054,-0.162270857

C,0,-0.0956159933,4.4180989228,0.4894797645

C,0,-1.5259909467,1.2368442917,-1.7955527957

C,0,-2.6623393769,2.1731814838,-2.2457707315

Rh,0,0.7335208399,-0.0928675238,-0.0914125142

C,0,0.861500341,5.1875614438,-0.3980430772

O,0,1.4018616291,1.1089595942,1.4845935991

C,0,2.5784742875,0.9327601006,1.9205283866

O,0,3.4365000954,0.1013108387,1.5337320046

Rh,0,2.9455873645,-1.2062629824,-0.0211532062

O,0,3.6119786109,0.1941157766,-1.4026393527

C,0,2.7969376137,1.0593297372,-1.8125820222

O,0,1.5863280196,1.2130898343,-1.4840155128  
H,0,0.3352053298,4.2086079793,1.4711800733  
H,0,-1.033869654,4.9568965609,0.6435731401  
H,0,-0.5787013731,1.6479697387,-2.1404890616  
H,0,-1.6087557162,0.257351703,-2.2667594626  
H,0,-2.7172081194,2.1970419945,-3.3385877729  
H,0,-2.4778498418,3.1950348116,-1.9058138176  
H,0,-3.6399724046,1.8671812222,-1.8680524671  
H,0,1.791067735,4.6334241903,-0.5421105793  
H,0,1.0997551959,6.1488410649,0.0657261555  
H,0,0.4192061488,5.3802120098,-1.378197818  
H,0,2.8805907521,1.5955026649,2.7438568158  
H,0,3.1814604008,1.7766015236,-2.5512638186  
C,0,-4.4105440424,-1.1240058693,0.7586256561  
C,0,-5.5591945009,-1.8826962384,0.5528218078  
C,0,-5.9504675804,-2.1030601898,-0.7610281994  
C,0,-5.199368907,-1.5777481185,-1.8221447507  
C,0,-4.0532520319,-0.822508706,-1.5992083318  
C,0,-3.6375428536,-0.5709879348,-0.2839342327  
N,0,-3.7956279607,-0.7909180904,1.9592032144  
C,0,-2.6671191805,-0.0714350321,1.7617288056  
C,0,-2.5040217943,0.1306430805,0.3588621215  
C,0,-1.8189678523,0.2781796887,2.9345995498  
H,0,-6.1224476229,-2.2888382605,1.3855029894  
H,0,-6.8384111314,-2.6889909004,-0.9666309062  
H,0,-5.5160697021,-1.7658882522,-2.8413825361  
H,0,-3.4988962646,-0.4479441365,-2.4456324632  
H,0,-4.0863333402,-1.1268557878,2.8648991723

H,0,-1.354792508,-0.3053647719,0.1706774161  
H,0,-0.7904292227,0.4657706329,2.6400778303  
H,0,-1.8330531718,-0.5420499147,3.6588968773  
H,0,-2.1917364348,1.1888737261,3.4086761529  
O,0,0.2375303832,-1.4025404535,-1.6436174597  
C,0,1.102544086,-2.2473710068,-2.022380967  
O,0,2.2661017224,-2.4197931437,-1.5830196829  
H,0,0.7870128765,-2.9099821961,-2.8404264596  
O,0,0.1064258675,-1.5460394568,1.298935267  
C,0,0.9347993463,-2.4263148106,1.6843968083  
O,0,2.1367279446,-2.5544168975,1.3574977478  
H,0,0.5395898439,-3.1634012447,2.3978943298

Cartesian coordinates of the optimized transition state for the reaction between 2-methylindole and  $\text{Et}(\text{EtO}_2\text{C})\text{C}=\text{Rh}_2$   $\text{Rh}_2(\text{S-NTTL})_4$  shown in Fig. 2(b)

In this case atoms C, O, N, H were treated at smaller basis set, 6-31G(d).

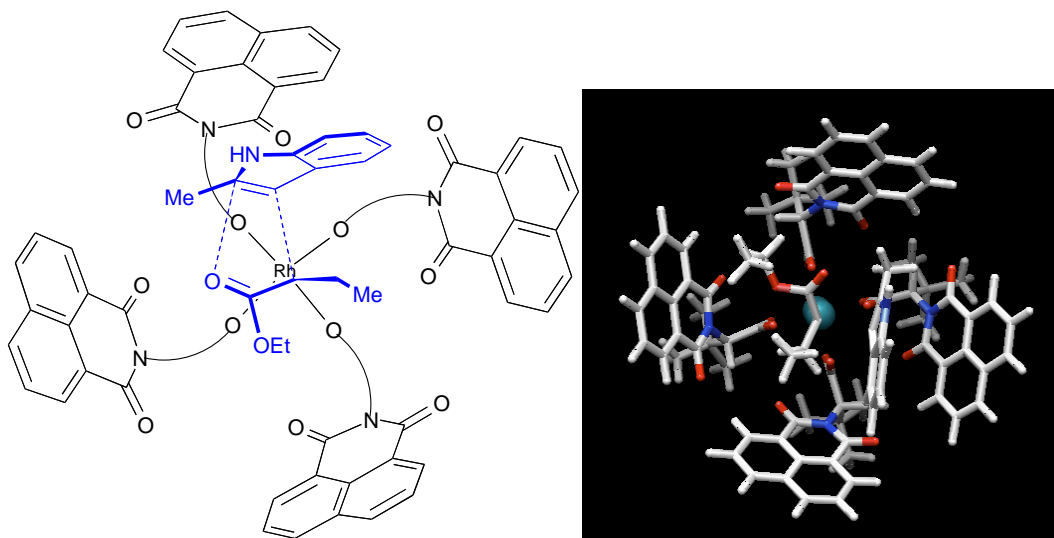

E+ZPVE -5210.852522 a.u. Im. Freq,  $\nu_i=150.6i \text{ cm}^{-1}$

Rh -0.1751738743,0.1429509477,-0.5694891752  
 Rh -0.3242714622,0.3219545075,-3.0328448264  
 C -0.6960398836,2.8296687312,-1.5918199282  
 C -1.0170158719,4.3278704277,-1.4048357954  
 C -1.2004019622,5.2165599287,-2.684941436  
 C 0.0147754747,5.2314671366,-3.6329121637  
 C -1.4958654052,6.6666479716,-2.2402317056  
 C -2.44232953,4.698022408,-3.4466283755  
 C -0.7096283667,5.5328965576,0.7260354044  
 C 0.1919172218,6.1694906045,1.7186686959  
 C -0.3531718779,6.885066271,2.7710622175  
 C 0.4848693936,7.5005128965,3.7243362872  
 C 1.8574557541,7.3897383074,3.6237995775  
 C 2.4516642185,6.6576580682,2.5626459468  
 C 1.5971878436,6.045962304,1.59516023  
 C 2.1570250352,5.3042616521,0.5258969805

C 3.5306432465,5.1576741786,0.4272864828  
C 4.3803844849,5.7584842137,1.3811220465  
C 3.8557238242,6.4966376596,2.4225186921  
C 1.2758094664,4.677174173,-0.4916219979  
C 2.347684996,0.7265494322,-1.9733802895  
C 3.8449824511,1.0944490793,-2.0172523421  
C 4.5220208288,1.2541189679,-3.4267316651  
C 4.4203169748,0.0068443693,-4.3268475729  
C 6.0170424551,1.5910429739,-3.2265384249  
C 3.8668958627,2.4599396998,-4.1406936479  
C 5.4191587388,0.8861351274,-0.1286413387  
C 6.210856128,0.0302491128,0.7887954186  
C 7.1092036853,0.618993896,1.6635542515  
C 7.8596074953,-0.174465216,2.555478632  
C 7.6971232543,-1.5458400836,2.5762403139  
C 6.7808961574,-2.1831546663,1.6998350463  
C 6.0385212248,-1.3754827458,0.7857885687  
C 5.1208686189,-1.9816301774,-0.1074274283  
C 4.9212630477,-3.3518224252,-0.0749292133  
C 5.643846718,-4.1530535967,0.8348925202  
C 6.5600590652,-3.5861109436,1.6966235325  
C 4.3713886638,-1.1543700451,-1.0828419318  
C 0.2781438937,-2.3512203055,-2.0288541291  
C 0.7186354262,-3.8263999206,-2.1153483258  
C 0.6549362344,-4.5451297719,-3.5110088072  
C 1.6894884242,-3.8688852815,-4.4411484574  
C 1.0850737199,-6.0177441561,-3.3281164818  
C -0.7313798793,-4.5190723306,-4.1838695084  
C -1.2776237689,-4.44806012,-0.7667764917  
C -1.8560751369,-5.1745011908,0.3896884513

C -3.2085567459,-5.0572690948,0.6640378747  
C -3.7757079336,-5.7664180042,1.7452354166  
C -2.9964781189,-6.585243088,2.5366213945  
C -1.6032650964,-6.716625585,2.2931653468  
C -1.0319322521,-5.9890811579,1.2050126326  
C 0.3599966862,-6.0714438085,0.9571156986  
C 1.1633915135,-6.8675914711,1.7568998788  
C 0.6024823313,-7.6039377945,2.8212847549  
C -0.7511489968,-7.5283294319,3.0861771212  
C 0.9735639502,-5.2927319175,-0.1477105161  
C -2.8202698709,-0.3855872208,-1.755236228  
C -4.2354707099,-0.9923387299,-1.6758305459  
C -5.0762815646,-1.1050396187,-2.9978516585  
C -4.3549788091,-2.1042788837,-3.9326576095  
C -5.2909573224,0.2269703097,-3.7436957905  
C -6.4580932713,-1.7042849831,-2.6520675863  
C -5.028967875,0.9966517064,-0.4153066091  
C -5.8354656697,1.5577743817,0.6982899745  
C -6.018288823,2.927327183,0.7871495693  
C -6.7754792498,3.4773039508,1.844029707  
C -7.3375040139,2.6586307967,2.8031188591  
C -7.170418558,1.2497036698,2.7438602751  
C -6.4098952568,0.6996675507,1.6669141581  
C -6.2292206095,-0.7020954796,1.5736196969  
C -6.7813110646,-1.5368865408,2.5297113368  
C -7.5285126368,-1.0008746151,3.5998319655  
C -7.7217675084,0.3620157405,3.7050145419  
C -5.463946033,-1.2899895358,0.4443103606  
N -0.1065088464,4.9063232956,-0.3807819376  
N 4.5992763428,0.2356197217,-1.0663454712

N 0.1048720595,-4.5867190658,-0.9952207448  
N -4.969575663,-0.4039509672,-0.5266106002  
O -0.5445354791,2.1927166179,-0.4969699779  
O -0.6951560059,2.3458446248,-2.7562667296  
O -1.9286617194,5.5701412361,0.8520964213  
O 1.7230959662,3.995837263,-1.4052324436  
O 1.8633640562,0.5626223628,-0.8012803344  
O 1.7073263728,0.7050762562,-3.0556619881  
O 5.4837591427,2.1116964697,-0.077470353  
O 3.5814452928,-1.64129181,-1.8810382587  
O 0.2527172929,-1.8748385689,-0.8438666091  
O 0.072704112,-1.7205651593,-3.1000669301  
O -1.9602066561,-3.7542636031,-1.5083349158  
O 2.1894075814,-5.2793247587,-0.3195938663  
O -2.2181275104,-0.3047483539,-0.6332984637  
O -2.3352311631,-0.1242435053,-2.8881616858  
O -4.4524605382,1.7119372582,-1.2216215181  
O -5.2950107337,-2.5018041991,0.3524985214  
H -1.987082704,4.3270340374,-0.9006115435  
H -0.2322080497,5.8270772449,-4.520996633  
H 0.2838171613,4.2239639698,-3.9537166178  
H 0.8932013602,5.6844994187,-3.1640650238  
H -1.7163012588,7.2792593094,-3.1221012154  
H -0.6376442657,7.1220265247,-1.7328362717  
H -2.3572704009,6.7194413411,-1.5658984779  
H -2.6596268624,5.3656549127,-4.2890566236  
H -3.3280405358,4.6791948853,-2.7990355942  
H -2.284169696,3.6910718026,-3.8356598768  
H -1.4328474613,6.961820403,2.8426559261  
H 0.0426888401,8.062868202,4.5415582634



H 2.5023090336,7.8618721097,4.3611516437  
H 3.9449471054,4.5657283076,-0.3809103938  
H 5.4544744519,5.6297250392,1.2881624416  
H 4.5128312533,6.9601192027,3.154616002  
H 3.880578843,2.0829277322,-1.5525562021  
H 4.9522919117,-0.8489695294,-3.901251968  
H 4.8754386545,0.2316638627,-5.2999519345  
H 3.3820583357,-0.2864527118,-4.4890826324  
H 6.5670796372,0.7631686179,-2.764670151  
H 6.1561624212,2.4811336898,-2.604714782  
H 6.4765285428,1.7818516069,-4.2032268198  
H 2.8237710628,2.2622183121,-4.3905863802  
H 4.4119020855,2.6734623101,-5.0681820464  
H 3.9008815255,3.3610332981,-3.5163431624  
H 7.2201121948,1.6979897008,1.6454356487  
H 8.5650743634,0.3005290206,3.2310088009  
H 8.269721803,-2.1559962554,3.2706219331  
H 4.1945583687,-3.8033542545,-0.7399191444  
H 5.4662509319,-5.2239494712,0.8494465417  
H 7.1188242915,-4.2065315929,2.3931699096  
H 1.7778272083,-3.7886337731,-1.8489027401  
H 1.749076806,-4.4238471003,-5.3852322768  
H 2.6893711854,-3.8653251169,-3.9902906274  
H 1.4144268036,-2.8368659584,-4.6631279207  
H 1.1260350139,-6.5072986619,-4.3080375854  
H 0.3731400438,-6.5795358137,-2.7125413915  
H 2.0743830981,-6.0996609218,-2.8660068342  
H -0.6545674033,-4.982568414,-5.1757416251  
H -1.0976561073,-3.4984996878,-4.3066384075  
H -1.4749426605,-5.0800888438,-3.6108282399

H -3.82333148,-4.4045808095,0.0550615956  
H -4.8371883197,-5.6590499913,1.9468043275  
H -3.4385018406,-7.1348904915,3.3642428124  
H 2.2264630404,-6.9105401249,1.5455341204  
H 1.2429891173,-8.231158118,3.434480763  
H -1.1809994898,-8.0905891567,3.9116545632  
H -4.0438784793,-2.0201251503,-1.3571581794  
H -4.9767478179,-2.2906716872,-4.8166712848  
H -4.181995342,-3.0648621739,-3.4329800137  
H -3.39075929,-1.7167363838,-4.265221511  
H -5.8273458955,0.0280423313,-4.680392489  
H -4.3413932886,0.7081171862,-3.9837925499  
H -5.890862846,0.9319841881,-3.1613439493  
H -7.0189551908,-1.8813450468,-3.5770096857  
H -7.0561860467,-1.0255808824,-2.0330832348  
H -6.3680145484,-2.6586427901,-2.1224159639  
H -5.5655359504,3.563876029,0.0341873612  
H -6.9109397722,4.553344063,1.8991432592  
H -7.9170384944,3.084833165,3.6184074432  
H -6.6297774121,-2.6066116084,2.4343951042  
H -7.9554993929,-1.669541681,4.3415327674  
H -8.3007513633,0.7730845295,4.5284248313  
O -0.0252509009,1.8624203232,2.9823641219  
C -0.2883039032,-0.0848954828,1.5014098387  
C -0.7039024223,1.1261696125,2.2917357724  
O -2.027860463,1.3109943792,2.0930021069  
C -2.5979107978,2.5403091428,2.6115206482  
C -0.9029111842,-1.3735345555,1.9615893881  
C -1.2814538988,-1.5431685002,3.4402773752  
C -3.103432436,2.3544614284,4.0342393613

H -3.4095478292,2.7720721495,1.9214903887  
H -1.8479196252,3.3291575285,2.553825211  
H -1.820107886,-1.4148320603,1.3472007192  
H -0.3002775172,-2.2114865158,1.5991396  
H -2.0208565453,-0.7954364632,3.7439648541  
H -0.4139132981,-1.4609824446,4.0997026329  
H -1.7258175407,-2.5331955366,3.5936689953  
H -3.8377443695,1.5434840888,4.086890287  
H -3.5885179133,3.2765013644,4.3764621666  
H -2.2759296933,2.1280292088,4.7131894399  
C 2.3841635507,-0.8876654979,4.3247481988  
C 2.4639202329,-1.5494237558,5.5474110675  
C 2.2844403531,-2.9346074662,5.5367820066  
C 2.0467508074,-3.6253475632,4.3364118537  
C 1.9563456141,-2.9490869652,3.1195975383  
C 2.1007744154,-1.5559347123,3.1072057733  
N 2.5750701131,0.4562862489,4.0110928592  
C 2.4015514313,0.6705001079,2.6760081838  
C 2.0392123761,-0.5439149098,2.0699079493  
C 2.6956355806,1.9970326961,2.066732122  
H 2.6704114159,-1.0164081007,6.4718386624  
H 2.3429886016,-3.4856884728,6.4713488185  
H 1.9298990519,-4.7054459176,4.3557955773  
H 1.7915540217,-3.4945196602,2.1954512907  
H 2.6808448851,1.200491418,4.6855995278  
H 2.1064161596,-0.7204881203,1.0084453514  
H 2.2021790603,2.084057358,1.099422082  
H 3.7746985012,2.1096031779,1.9017804126  
H 2.3568274731,2.8115162832,2.7120913193

**Complete ref 1f:**

(1) (f) Black, W. C.; Bayly, C.; Belley, M.; Chan, C. C.; Charleson, S.; Denis, D.; Gauthier, J. Y.; Gordon, R.; Guay, D.; Kargman, S.; Lau, C. K.; Leblanc, Y.; Mancini, J.; Ouellet, M.; Percival, D.; Roy, P.; Skorey, K.; Tagari, P.; Vickers, P.; Wong, E.; Xu, L.; Prasit, P. *Biorg. Med. Chem. Lett.* **1996**, *6*, 725.
